# Supplementary material for: Sequence variability of Chrysanthemum stunt viroid in different chrysanthemum cultivars
Source: PeerJ. 2017 Jan 26;5:e2933. doi: 10.7717/peerj.2933 (PMC5274516; doi:10.7717/peerj.2933)
Supplement: Supplemental Information 1 [file peerj-05-2933-s001.xlsx]

## Sheet: Table S1
Table S1. Name and detailed genome sequence of each clone derived from 12 different chrysanthemum plant.
1. Borami	1	>5-1	AAAGAAATGAGGCGAAGAAGTCCTTCAGGGATCCCCGGGGAAACCTGGAGGAAGTCCGACGAGATCGCGGCTGGGGCTTAGGACCCCACTCCTGCGAGACAGGAGTAATCCTAAACAGGGTTTTCACCCTTCCTTTAGTTCCCTTCCTCTCCTGGAGAGGTCTTCTGCCCTAGCCCGGTCTTCGAAGCTTCCTTTGGCTACTACCCGGTGGAAACAACTGAAGCTTCAACGCCTTTTTTTCCTATCTTCTTTAGCACCGGGCTAGGGAGTAAGCCCGTGGAACCTTAGTTTTGTTCCCTCGGGACTTACTTGTGGTTCCTGTGGTGCACTCCTGACCCTGCTGCTTTGAAAGAA	354
	2	>5-2	AAAGAAATGAGGCGAAGAAGTCCTTCAGGGATCCCCGGGGAAACCTGGAGGAAGTCCGACGAGATCGCGGCTGGGGCTTAGGACCCCACTCCTGCGAGACAGGGGTAATCCTAAACAGGGTTTTCACCCTTCCTTTAGTTTCCTTCCTCTCCTGGAGAGGTCTTCTGCCCTAGCCCGGTCTTCGAAGCTTCCTTTGGCTACTACCCGGTGGAAACAACTGAAGCTTCAACGCCTTTTTTTCCAATCTTCTTTAGCACCGGGCTAGGGAGTAAGCCCGTGGAACCTTAGTTTTGTTCCCTCGGGACTTACTTGTGGTTCCTGTGGTGCACTCCTGACCCTGCTGCTTTGAAAGAA	354
	3	>5-3	AAAGAAATGAGGCGAAGAAGTCCTTCAGGGATCCCCGGGGAAACCTGGAGGAAGTCCGACGAGATCGCGGCTGGGGCTTAGGACCCCACTCCTGCGAGACAGGAGTAATCCTAAACAGGGTTTTCACCCTTCCTTTAGTTTCCTTCCTCTCCTGGAGAGGTCTTCTGCCCTAGCCCGGTCTTCGAAGCTTCCTTTGGCTACTACCCGGTGGAAACAACTGAAGCTTCAACGCCTTTTTTTCCTATCTTCTTTAGCACCGGGCTAGGGAGTAAGCCCGTGGAACCTTAGTTTTGTTCCCTCGGGACTTACTTGTGGTTCCTGTGGTGCACTCCTGACCCTGCTGCTTTGAAAGAA	354
	4	>5-5	AAAGAAATGAGGCGAAGAAGTCCTTCAGGGATCCCCGGGGAAACCTGGAGGAAGTCCGACGAGATCGCGGCTGGGGCTTAGGACCCCACTCCTGCGAGACAGGAGTAATCCTAAACAGGGTTTTCACCCTTCCTTTAGTTTCCTTCCTCTCCTGGAGAGGTCCTCTGCCCTAGCCCGGTCTTCGAAGCTTCCTTTGACTACTACCCGGTGGAAACAACTGAAGCTTCAACGCCTTTTTTTCCAATCTTCTTTAGCACCGGGCTAGGGAGTAAGCCCGTGGAACCTTAGTTTTGTTCCCTCGGGACTTACTTGTGGTTCCTGTGGTGCACTCCTGACCCTGCTGCTTTGAAAGAA	354
	5	>5-6	AAAGAAATGAGGCGAAGAAGTCCTTCAGGGATCCCCGGGGAAACCTGGAGGAAGTCCGACGAGATCGCGGCTGGGGCTTAGGACCCCACTCCTGCGAGACAGGAGTAATCCTAAACAGGGCTTTCACCCTTCCTTTAGTTTCCTTCCTCTCCTGGAGAGGTCTTCTGCCCTAGCCCAGTCTTCGAAGCTTCCTTTGGCTACTACCCGGTGGAAACAACTGAAGCTTCAACGCCTTTTTTTCCAATCTTCTTTAGCACCGGGCTAGGGAGTAAGCCCGTGGAACCTTAGTTTTGTTCCCTCGGGACTTACTTGTGGTTCCTGTGGTGCACTCCTGACCCTGCTGCTTTGAAAGAA	354
	6	>5-8	AAAGAAATGAGGCGAAGAAGTCCTTCAGGGATCCCCGGGGAAACCTGGAGGAAGTCCGACGAGATCGCGGCTGGGGCTTAGGACCCCACTCCTGCGAGACAGGAGTAATCCTAAACAGGGTTTTCACCCTTCCTTTAGTTTCCTTCCTCTCCTGGAGAGGTCTTCTGCCCTAGCCCGGTCTTCGAAGCTTCCTTTGGCTACTACCCGGTGGAAACAACTGAAGCTTCAACGCCTTTTTTTCCAATCTTCTTTAGCACCGGGCTAGGGAGTAAGCCCGTGGAACCTTAGTTTTGTTCCCTCGGGACTTACTTGTGGTTCCTGTGGTGCACTCCTGACCCTGCTGCTTTGAAAGAA	354
	7	>5-9	AAAGAAATGAGGCGAAGAAGTCCTTCAGGGATCCCCGGGGAAACCTGGAGGAAGTCCGACGAGATCGCGGCTGGGGCTTAGGACCCCACTCCTGCGAGACAGGAGTAATCCTAAACAGGGTTTTCACCCTTCCTTTAGTTTCCTTCCTCTCCTGGAGAGGTCTTCTGCCCTAGCCCGGTCTTCGAAGCTTCCTTTGGCTACTACCCGGTGGAAACAACTGAAGCTTCAACGCCTTTTTTTCCTATCTTCTTTAGCACCGGGCTAGGGAGTAAGCCCGTGGAACCTTAGTTTTGTTCCCTCGGGACTTACTTGTGGTTCCTGTGGTGCACTCCTGACCCTGCTGCTTTGAAAGAA	354
	8	>5-10	AAAGAAATGAGGCGAAGAAGTCCTTCAGGGATCCCCGGGGAAACCTGGAGGAAGTCCGACGAGATCGCGGCTGGGGCTTAGGACCCCACTCCTGCGAGACAGGAGTAATCCTAAACAGGGCTTTCACCCTTCCTTTAGTTTCCTTCCTCTCCTGGAGAGGTCTTCTGCCCTAGCCCGGTCTTCGAAGCTTCCTTTGGCTACTACCCGGTGGAAACAACTGAAGCTTCAACGCCTTTTTTTCCAATCTTCTTTAGCACCGGGCTAGGGAGTAAGCCCGTGGAACCTTAGTTTTGTTCCCTCGGGACTTACTTGTGGTTCCTGTGGTGCACTCCTGACCCTGCTGCTTTGAAAGAA	354
	9	>5-11	AAAGAAATGAGGCGAAGAAGTCCTTCAGGGATCCCCGGGGAAACCTGGAGGAAGTCCGACGAGATCGCGGCTGGGGCTTAGGACCCCACTCCTGCGAGACAGGAGTAATCCTAAACAGGGTTTTCACCCTTCCTTTAGTTTCCTTCCTCTCCTGGAGAGGTCTTCTGCCCTAGCCCGGTCTTCGAAGCTTCCTTTGGCTACTACCCGGTGGAAACAACTGAAGCTTCAACGCCTTTTTTTCCAATCTTCTTTAGCACCGGGCTAGGGAGTAAGCCCGTGGAACCTTAGTTTTGTTCCCTCGGGACTTACTTGTGGTTCCTGTGGTGCACTCCTGACCCTGCTGCTTTGAAAGAA	354
	10	>5-12	AAAGAAATGAGGCGAAGAAGTCCTTCAGGGATCCCCGGGGAAACCTGGAGGAAGTCCGACGAGATCGCGGCTGGGGCTTAGGACCCCACTCCTGCGAGACAGGAGTAATCCTAAACAGGGTTTTCACCCTTCCTTTAGTTTCCTTCCTCTCCTGGAGAGGTCTTCTGCCCTAGCCCGGTCTTCGAAGCCTCCTTTGGCTACTACCCGGTGGAAACAACTGAAGCTTCAACGCCTTTTTTTCCTATCTTCTTTAGCACCGGGCTAGGGAGTAAGCCCGTGGAACCTTAGTTTTGTTCCCTCGGGACTTACTTGTGGTTCCTGTGGTGCACTCCTGACCCTGCTGCTTTGAAAGAA	354
	11	>5-13	AAAGAAATGAGGCGAAGAAGTCCTTCAGGGATCCCCGGGGAAACCTGGAGGAAGTCCGACGAGATCGCGGCTGGGGCTTAGGACCCCACTCCTGCGAGACAGGAGTAATCCTAAACAGGGTTTTCACCCTTCCTTTAGTTTCCTTCCTCTCCTGGAGAGGTCTTCTGCCCTAGCCCGGTCTTCGAAGCTTCCTTTGGCTACTACCCGGTGGAAACAACTGAAGCTTCAACGCCTTTTTTTCCTATCTTCTTTAGCACCGGGCTAGGGAGTAAGCCCGTGGAACCTTAGTTTTGTTCCCTCGGGACTTACTTGTGGTTCCTGTGGTGCACTTCTGACCCTGCTGCTTTGAAAGAA	354
	12	>5-14	AAAGAAATGAGGCGAAGAAGTCCTTCAGGGATCCCCGGGGAAACCTGGAGGAAGTCCGACGAGATCGCGGCTGGGGCTTAGGACCCCACTCCTGCGAGACGGGAGTAATCCTAAACAGGGTTTTCACCCTTCCTTTAGTTTCCTTCCTCTCCTGGAGAGGTCTTCTGCCCTAGCCCGGTCTTCGAAGCTTCCTTTGGCTATTACCCGGTGGAAACAACTGAAGCTTCAACGCCTTTTTTTCCTATCTTCTTTAGCACCGGGCTAGGGAGTAAGCCCGTGGAACCTTAGTTTTGTTCCCTCGGGACTTACTTGTGGTTCCTGTGGTGCACTCCTGACCCTGCTGCTTTGAAAGAA	354
	13	>5-15	AAAGAAATGAGGCGAAGAAGTCCTTCAGGGATCCCCGGGGAAACCTGGAGGAAGTCCGACGAGATCGCGGCTGGGGCTTAGGACCCCACTCCTGCGAGACAGGAGTAATCCTAAACAGGGTTTTCACCCTTCCTTTAGTTTCCTTCCTCTCCTGGAGAGGTCTTCTGCCCTAGCCCGGTCTTCGAAGCTTCCTTTGGCTACTACCCGGTGGAAACAACTGAAGCTTCAACGCCTTTTTTTCCTATCTTCTTTAGCACCGGGCTAGGGAGTAAGCCCGTGGAACCTTAGTTTTGTTCCCTCGGGACTTACTTGTGGTTCCTGTGGTGCACTCCTGACCCTGCTGCTTTGAAAGAA	354
	14	>5-16	AAAGAAATGAGGCGAAGAAGTCCTTCAGGGATCCCCGGGGAAACCTGGAGGAAGTCCGACGAGATCGCGGCTGGGGCTTAGGACCCCACTCCTGCGAGACAGGAGTAATCCTAAACAGGGCTTTCACCCTTCCTTTAGTTTCCTTCCTCTCCTGGAGAGGTCTTCTGCCCTAGCCCGGTCTTCGAAGCTTCCTTTGGCTACTACCCGGTGGAAACAACTGAAGCTTCAACGCCTTTTTTTCCAATCTTCTTTAGCACCGGGCTAGGGAGTAAGCCCGTGGAACCTTAGTTTTGTTCCCTCGGGACTTACTTGTGGTTCCTGTGGTGCACTCCTGACCCTGCTGCTTTGAAAGAA	354
	15	>5-18	AAAGAAATGAGGCGAAGAAGTCCTTCAGGGATCCCCGGGGAAACCTGGAGGAAGTCCGACGAGATCGCGGCTGGGGCTTAGGACCCCACTCCTGCGAGACAGGAGTAATCCTAAACAGGGTTTTCACCCTTCCTTTAGTTTCCTTCCTCTCCTGGAGAGGTCTTCTGCCCTAGCCCGGTCTTCGAAGCTTCCTTTGGCTACTACCCGGTGGAAACAACTGAAGCTTCAACGCCTTTTTTTCCTATCTTCTTTAGCACCGGGCTAGGGAGTAAGCCCGTGGAACCTTAGTTTTGTTCCCTCGGGACTTACTTGTGGTTCCTGTGGTGCACTCCTGACCCTGCTGCTTTGAAAGAA	354
	16	>5-20	AAAGAAATGAGGCGAAGAAGTCCTTCAGGGATCCCCGGGGAAACCTGGAGGAAGTCCGACGAGATCGCGGCTGGGGCTTAGGACCCCACTCCTGCGAGACAGGAGTAATCCTAAACAGGGCTTTCACCCTTCCTTTAGTTTCCTTCCTCTCCTGGAGAGGTCTTCTGCCCTAGCCCGGTCTTCGAAGCTTCCTTTGGCTACTACCCGGTGGAAACAACTGAAGCTTCAACGCCTTTTTTTCCAATCTTCTTTAGCACCGGGCTAGGGAGTAAGCCCGTGGAACCTTAGTTTTGTTCCCTCGGGACTTACTTGTGGTTCCTGTGGTGCACTCCTGACCCTGCTGCTTTGAAAGAA	354
	17	>5-21	AAAGAAATGAGGCGAAGAAGTCCTTCAGGGATCCCCGGGGAAACCTGGAGGAAGTCCGACGAGATCGCGGCTGGGGCTTAGGACCCCACTCCTGCGAGACAGGAGTAATCCTAAACAGGGTTTTCACCCTTCCTTTAGTTTCCTTCCTCTCCTGGAGAGGTCTTCTGCCCTAGCCCGGTCTTCGAAGCTTCCTTTGGCTATTACCCGGTGGAAACAACTGAAGCTTCAACGCCTTTTTTTCCTATCTTCTTTAGCACCGGGCTAGGGAGTAAGCCCGTGGAACCTTAGTTTTGTTCCCTCGGGACTTACTTGTGGTTCCTGTGGTGCACTCCTGACCCTGCTGCTTTGAAAGAA	354
	18	>5-22	AAAGAAATGAGGCGAAGAAGTCCTTCAGGGATCCCCGGGGAAACCTGGAGGAAGTCCGACGAGATCGCGGCTGGGGCTTAGGACCCCACTCCTGCGAGACAGGAGTAATCCTAAACAGGGCTTTCACCCTTCCTTTAGTTTCCTTCCTCTCCTGGAGAGGTCTTCTGCCCTAGCCCGGTCTTCGAAGCTTCCTTTGGCTACTACCCGGTGGAAACAACTGAAGCTTCAACGCCTTTTTTTCCAATCTTCTTTAGCACCGGGCTAGGGAGTAAGCCCGTGGAACCTTAGTTTTGTTCCCTCGGGACTTACTTGTGGTTCCTGTGGTGCACTCCTGACCCTGCTGCTTTGAAAGAA	354
	19	>5-24	AAAGAAATGAGGCGAAGAAGTCCTTCAGGGATCCCCGGGGAAACCTGGAGGAAGTCCGACGAGATCGCGGCTGGGGCTTAGGACCCCACTCCTGCGAGACAGGAGTAATCCTAAACAGGGTTTTCACCCTTCCTTTAGTTTCCTTCCTCTCCTGGAGAGGTCTTCTGCCCTAGCCCGGTCTTCGAAGCTTCCTTTGGCTACTACCCGGTGGAAACAACTGAAGCTTCAACGCCTTTTTTTCCTATCTTCTTTAGCACCGGGCTAGGGAGTAAGCCCGTGGAACCTTAGTTTTGTTCCCTCGGGACTTACTTGTGGTTCCTGTGGTGCACTCCTGACCCTGCTGCTTTGAAAGAA	354
	20	>5-26	AAAGAAATGAGGCGAAGAAGTCCTTCAGGGATCCCCGGGGAAACCTGGAGGAAGTCCGACGAGATCGCGGCTGGGGCTTAGGACCCCACTCCTGCGAGACAGGAGTAATCCTAAACAGGGTTTTCGCCCTTCCTTTAGTTTCCTTCCTCTCCTGGAGAGGTCTTCTGCCCTAGCCCGGTCTTCGAAGCTTCCTTTGGCTACTACCCGGTGGAAACAACTGAAGCTTCAACGCCTTTTTTTCCTATCTTCTTTAGCACCGGGCTAGGGAGTAAGCCCGTGGAACCTTAGTTTTGTTCCCTCGGGACTTACTTGTGGTTCCTGTGGTGCACTCCTGACCCTGCTGCTTTGAAAGAA	354
2. Ford	1	>1-1	AAAGAAATGAGGCGAAGAAGTCCTTCAGGGATCCCCGGGGAAACCTGGAGGAAGTCCGACGAGATCGCGGCTGGGGCTTAGGACCCCACTCCTGCGAGACAGGAGTAATCCTAAACAGGGCTTTCACCCTTCCTTTAGTTTCCTTCCTCTCCTGGAGAGGTCTTCTGCCCTAGCCCGGTCCTCGAAGCTTCCTTTGGCTACTACCCGGTGGAAACAACTGAAGCTTCAACGCCTTTTTTTCCAATCTTCTTTAGCACCGGGCTAGGGAGTAAGCCCGTGGAACCTTAGTTTTGTTCCCTCGGGACTTACTTGTGGTTCCTGTGGTGCACTCCTGACCCTGCTGCTTTGAAAGAA	354
	2	>1-2	AAAGAAATGAGGCGAAGAAGTCCTTCAGGGATCCCCGGGGAAACCTGGAGGAAGTCCGACGAGATCGCGGCTGGGGCTTAGGACCCCACTCCTGCGAGACAGGAGTAATCCTAAACAGGGTTTTCACCCTTCCTTTAGTTTCCTTCCTCTCCTGGAGAGGTCTTCTGCCCTAGCCCGGTCTTCGAAGCTTCCTTTGGCTACTACCCGGTGGAAACAACTGAAGCTTCAACGCCTTTTTTTCCAATCTTCTTTAGCACCGGGCTAGGGAGTAAGCCCGTGGAACCTTAGTTTTGTTCCCTCGGGACTTACTTGTGGTTCCTGTGGTGCACTCCTGACCCTGCTGCTTTGAAAGAA	354
	3	>1-3	AAAGAAATGAGGCGAAGAAGTCCTTCAGGGATCCCCGGGGAAACCTGGAGGAAGTCCGACGAGATCGCGGCTGGGGCTTAGGACCCCACTCCTGCGAGACAGGAGTAATCCTAAACAGGGTTTTCACCCTTCCTTTAGTTTCCTTCCTCTCCTGGAGAGGTCTTCTGCCCTAGCCCGGTCTTCGAAGCTTCCTTTGGCTACTACCCGGTGGAGACAACTGAAGCTTCAACGCCTTTTTTTCCAATCTTCTCTAGCACCGGGCTAGGGAGTAAGCCCGTGGAACCTTAGTTTTGTTCCCTCGGGACTTACTTGTGGTTCCTGTGGTGCACTCCTGACCCTGCTGCTTTGAAAGAA	354
	4	>1-4	AAAGAAATGAGGCGAAGAAGTCCTTCAGGGATCCCCGGGGAAACCTGGAGGAAGTCCGACGAGATCGCGGCTGGGGCTTAGGACCCCACTCCTGCGAGACAGGAGTAATCCTAAACAGGGCTTTCACCCTTCCTTTAGTTTCCTTCCTCTCCTGGAGAGGTCTTCTGCCCTAGCCCGGTCTTCGAAGCTTCCTTTGGCTACTACCCGGTGGAAACAACTGAAGCTTCAACGCCTTTTTTTCCAATCTTCTTTAGCACCGGGCTAGGGAGTAAGCCCGTGGAACCTTAGTTTTGTTCCCTCGGGACTTACTTGTGGTTCCTGTGGTGCACTCCTGACCCTGCTGCTTTGAAAGAA	354
	5	>1-9	AAaGAAATGAGGCGAAGAAGTCCTTCAGGGATCCCCGGGGAAACCTGAAGGAAGTCCGACGAGATCGTGGCTGGGGCTTAGGACCCCACTCCTGCGAGACAGGAGTAATCCTAAACAGGGTTTTCACCCTTCCTTTAATTTCCTTCCTCTCCTGGAGAGGTCTTCTGCCCTAGCCCGGTCTTCGAAGCTTCCTTTGGCTACTACCCGGTGGAAACAACTGAAGCTTCAACGCCTTTTTTTCCAATCTTCTTTAGGACCGGGCCAAGGAGTAAGCCCGTGGAACCTTAGTTTTGTTCCCTCGGGACTTACTTGTGGTTCCTGTGGTGCACTCCTGACCCTGCTGCTTTGAAAGAA	354
	6	>1-10	AAAGAAATGAGGCGAAGAAGTCCTTCAGGGATCCCCGGGGAAACCTGGAGGAAGTCCGACGAGATCGCGGCTGGGGCTTAGGACCCCACTCCTGCGAGACAGGAGTAATCCTAAACAGGGTTTTCACCCTTCCTTTAGTTTCCTTCCTCTCCTGGAGAGGTCTTCTGCCCTAGCCCGGTCTTCGAAGCTTCCTTTGGCTACTACCCGGTGGAAACAACTGAAGCTTCAACGCCTTTTTTTCCTATCTTCTTTAGCACCGGGCTAGGGAGTAAGCCCGTGGAACCTTAGTTTTGTTCCCTCGGGACTTACTTGTGGTTCCTGTGGTGCACTCCTGACCCTGCTGCTTTGAAAGAA	354
	7	>1-13	AAAGAAATGAGGCGAAGAAGTCCTTCAGGGATCCCCGGGGAAACCTGGAGGAAGTCCGACGAGATCGCGGCTGGGGCTTAGGACCCCACTCCTGCGAGACAGGGGTAATCCTAAACAGGGTTTTCACCCTTCCTTTAGTTTCCTTCCTCTCCTGGAGAGGTCTTCTGCCCTAGCCCGGTCTTCGAAGCTTCCTTTGGCTACTACCCGGTGGAAACAACTGAAGCTTCAACGCCTTTTTTTCCAATCTTCTTTAGCACCGGGCTAGGGAGTAAGCCCGTGGAACCTTAGTTTTGTTCCCTCGGGACTTACTTGTGGTTCCTGTGGTGCACTCCTGACCCTGCTGCTTTGAAAGAA	354
	8	>1-14	AAAGAAATGAGGCGAAGAAGTCCTTCAGGGATCCCCGGGGAAACCTGGAGGAAGTCCGACGAGATCGCGGCTGGGGCTTAGGACCCCACTCCTGCGAGACAGGAGTAATCCTAAACAGGGTTTTCACCCTTCCTTTAGTTTCCTTCCTCTCCTGGAGAGGTCTTCTGCCCTAGCCCGGTCTTCGAAGCTTCCTTTGGCTACTACCCGGTGGAAACAACTGAAGCTTCAACGCCTTTTTTTCCAATCTTCTTTAGCACCGGGCTAGGGAGTAAGCCCGTGGAACCTTAGTTTTGTTCCCTCGGGACTTACTTGTGGTTCCTGTGGTGCACTCCTGACCCTGCTGCTTTGAAAGAA	354
	9	>1-16	AAAGAAATGAGGCGAAGAAGTCCTTCAGGGATCCCCGGGGAAACCTGGAGGAAGTCCGACGAGATCGCGGCTGGGGCTTAGGACCCCACTCCTGCGAGACAGGAGTAATCCTAAACAGGGCTTTCACCCTTCCTTTAGTTTCCTTCCTCTCCTGGAGAGGTCTTCTGCCCTAGCCCGGTCCTCGAAGCTTCCTTTGGCTACTACCCGGTGGAAACAACTGAAGCTTCAACGCCTTTTTTTCCAATCTTCTTTAGCACCGGGCTAGGGAGTAAGCCCGTGGAACCTTAGTTTTGTTCCCTCGGGACTTACTTGTGGTTCCTGTGGTGCACTCCTGACCCTGCTGCTTTGAAAGAA	354
	10	>1-17	AAAGAAATGAGGCGAAGAAGTCCTTCAGGGATCCCCGGGGAAACCTGGAGGAAGTCCGACGAGATCGCGGCTGGGGCTTAGGACCCCACTCCTGCGAGACAGGAGTAATCCTAAACAGGGTTTTCACCCTTCCTTTAGTTTCCTTCCTCTCCTGGAGAGGTCTTCTGCCCTAGCCCGGTCTTCGAAGCTTCCTTTGGCTACTACCCGGTGGAAACAACTGAAGCTTCAACGCCTTTTTTTCCAATCTTCTTTAGCACCGGGCTAGGGAGTAAGCCCGTGGAACCTTAGTTTTGTTCCCTCGGGACTTACTTGTGGTTCCTGTGGTGCACTCCTGACCCTGCTGCTTTGAAAGAA	354
	11	>1-18	AAAGAAATGAGGCGAAGAAGTCCTTCAGGGATCCCCGGGGAAACCTGGAGGAAGTCCGACGAGATCGCGGCTGGGGCTTAGGACCCCACTCCTGCGAGACAGGAGTAATCCTAAACAGGGTTTTCACCCTTCCTTTAGTTTCCTTCCTCTCCTGGAGAGGTCTTCTGCCCTAGCCCGGTCTTCGAAGCTTCCTTTGGCTACTACCCGGTGGAAACAACTGAAGCTTCAACGCCTTTTTTTCCAATCTTCTTTAGCACCGGGCTAGGGAGTAAGCCCGTGGAACCTTAGTTTTGTTCCCTCGGGACTTACTTGTGGTTCCTGTGGTGCACTCCTGACCCTGCTGCTTTGAAAGAA	354
	12	>1-19	AAAGAAATGAGGCGAAGAAGTCCTTCAGGGATCCCCGGGGAAACCTGGAGGAAGTCCGACGAGATCGCGGCTGGGGCTTAGGACCCCACTCCTGCGAGACAGGAGTAATCCTAAACAGGGTTTTCACCCTTCCTTTAGTTTCCTTCCTCTCCTGGAGAGGTCTTCTGCCCTAGCCCGGTCTTCGAAGCTTCCTTTGGCTACTACCCGGTGGAAACAACTGAAGCTTCAACGCCTTTTTTTCCAATCTTCTTTAGCACCGGGCTAGGGAGTAAGCCCGTGGAACCTTAGTTTTGTTCCCTCGGGACTTACTTGTGGTTCCTGTGGTGCACTCCTGACCCTGCTGCTTTGAAAGAA	354
	13	>1-24	AAAGAAATGAGGCGAAGAAGTCCTTCAGGGATCCCCGGGGAAACCTGGAGGAAGTCCGACGAGATCGCGGCTGGGGCTTAGGACCCCACTCCTGCGAGACAGGAGTAATCCTAAACAGGGTTTTCACCCTTCCCTTAGTTTCCTTCCTCTCCTGGAGAGGTCTTCTGCCCTAGCCCGGTCTTCGAAGCTTCCTTTGGCTACTACCCGGTGGAAACAACTGAAGCTTCAACGCCTTTTTTTCCAATCTTCTTTAGCACCGGGCTAGGGAGTAAGCCCGTGGAACCTTAGTTTTGTTCCCTCGGGACTTACTTGTGGTTCCTGTGGTGCACTCCTGACCCTGCTGCTTTGAAAGAA	354
	14	>1-25	AAAGAAATGAGGCGAAGAAGTCCTTCAGGGATCCCCGGGGAAACCTGGAGGAAGTCCGACGAGATCGCGGCTGGGGCTTAGGACCCCACTCCTGCGAGACAGGAGTAATCCTAAACAGGGTTTTCACCCTTCCTTTAGTTTCCTTCCTCTCCTGGAGAGGTCTTCTGCCCTAGCCCGGTCTTCGAAGCTTCCTTTGGCTACTACCCGGTGGAAACAACTGAAGCTTCAACGCCTTTTTTTCCAATCTTCTTTAGCACCGGGCTAGGGAGTAAGCCCGTGGAACCTTAGTTTTGTTCCCTCGGGACTTACTTGTGGTTCCTGTGGTGCACTCCTGACCCTGCTGCTTTGAAAGAA	354
	15	>1-26	AAAGAAATGAGGCGAAGAAGTCCTTCAGGGATCCCCAGGGAAACCTGGAGGAAGTCCGACGAGATCGCGGCTGGGGCTTAGGACCCCACTCCTGCGAGACAGGAGTAATCCTAAACAGGGTTTTCACCCTTCCTTTAGTTTCCTTCCTCTCCTGGAGAGGTCTTCTGCCCTAGCCCGGTCTTCGAAGCTTCCTTTGGCTACTACCCGGTGGAAACAACTGAAGCTTCAACGCCTTTTTTTCCAATCTTCTTTAGCACCGGGCTAGGGAGTAAGCCCGTGGAACCTTAGTTTTGTTCCCTCGGGACTTACTTGTGGTTCCTGTGGTGCACTCCTGACCCTGCTGCTTTGAAAGAA	354
	16	>1-27	AAAGAAATGAGGCGAAGAAGTCCTTCAGGGATCCCCGGGGAAACCTGGAGGAAGTCCGACGAGATCGCGGCTGGGGCTTAGGACCCCACTCCTGCGAGACAGGAGTAATCCTAAACAGGGTTTTCACCCTTCCTTTAGTTTCCTTCCTCTCCTGGAGAGGTCTTCTGCCCTAGCCCGGTCTTCGAAGCTTCCTTTGGCTACTACCCGGTGGAAACAACTGAAGCTTCAACGCCTTTTTTTCCAATCTTCTTTAGCACCGGGCTAGGGAGTAAGCCCGTGGAACCTTAGTTTTGTTCCCTCGGGACTTACTTGTGGTTCCTGTGGTGCACTCCTGACCCTGCTGCTTTGAAAGAA	354
	17	>1-28	AAAGAAATGAGGCGAAGAAGTCCTTCAGGGATCCCCGGGGAAACCTGGAGGAAGTCCGACGAGATCGCGGCTGGGGCTTAGGACCCCACTCCTGCGAGACAGGAGTAATCCTAAACAGGGTTTTCACCCTTCCTTTAGTTTCCTTCCTCTCCTGGAGAGGTCTTCTGCCCTAGCCCGGTCTTCGAAGCTTCCTTTGGCTACTACCCGGTGGAAACAACTGAAGCTTCAACGCCTTTTTTTCCAATCTTCTTTAGCACCGGGCTAGGGAGTAAGCCCGTGGAACCTTAGTTTTGTTCCCTCGGGACTTACTTGTGGTTCCTGTGGTGCACTCCTGACCCTGCTGCTTTGAAAGAA	354
	18	>1-29	AAAGAAATGAGGCGAAGAAGTCCTTCAGGGATCCCCGGGGAAACCTGGAGGAAGTCCGACGAGATCGCGGCTGGGGCTTAGGACCCCACTCCTGCGAGACAGGAGTAATCCTAAACAGGGTTTTCACCCTTCCTTTAGTTTCCTTCCTCTCCTGGAGAGGTCTTCTGCCCTAGCCCGGTCTTCGAAGCTTCCTTTGGCTACTACCCGGTGGAAACAACTGAAGCTTCAACGCCTTTTTTTCCAATCTTCTTTAGCACCGGGCTAGGGAGTAAGCCCGTGGAACCTTAGTTTTGTTCCCTCGGGACTTACTTGTGGTTCCTGTGGTGCACTCCTGACCCTGCTGCTTTGAAAGAA	354
	19	>1-31	AAAGAAATGAGGCGAAGAAGTCCTTCAGGGTTCCCCGGGGAAACCTGGAGGAAGTCCGACGAGATCGCGGCTGGGGCTTAGGACCCCACTCCTGCGAGACAGGAGTAATCCTAAACAGGGTTTTCACCCTTCCTTTAGTTTCCTTCCTCTCCTGGAGAGGTCTTCTGCCCTAGCCCGGTCTTCGAAGCTTCCTTTGGCTACTACCCGGTGGAAACAACTGAAGCTTCAACGCCTTTTTTTCCTATCTTCTTTAGCACCGGGCTAGGGAGTAAGCCCGTGGAACCTTAGTTTTGTTCCCTCGGGACTTACTTGTGGTTCCTGTGGTGCACTCCTGACCCTGCTGCTTTGAAAGAA	354
	20	>1-33	AAAGAAATGAGGCGAAGAAGTCCTTCAGGGATCCCCGGGGAAACCTGGAGGAAGTCCGACGAGATCGCGGCTGGGGCTTAGGACCCCACTCCTGCGAGACAGGAGTAATCCTAAACAGGGCTTTCACCCTTCCTTTAGTTTCCTTCCTCTCCTGGAGAGGTCTTCTGCCCTAGCCCGGTCTTCGAAGCTTCCTTTGGCTACTACCCGGTGGAAACAACTGAAGCTTCAACGCCTTTTTTTCCAATCTTCTTTAGCACCGGGCTAGGGAGTAAGCCCGTGGAACCTTAGTTTTGTTCCCTCGGGACTTACCTGTGGTTCCTGTGGTGCACTCCTGACCCTGCTGCTTTGAAAGAA	354
	21	>1-34	AAAGAAATGAGGCGAAGAAGTCCTTCAGGGATCCCCGGGGAAACCTGGAGGAAGTCCGACGAGATCGCGGCTGGGGCTTAGGACCCCACTCCTGCGAGACAGGGGTAATCCTAAACAGGGTTTTCACCCTTCCTTTAGTTTCCTTCCTCTCCTGGAGAGGTCTTCTGCCCTAGCCCGGTCTTCGAAGCTTCCTTTGGCTACTACCCGGTGGAAACAACTGAAGCTTCAACGCCTTTTTTTCCAATCTTCTTTAGCACCGGGCTAGGGAGTAAGCCCGTGGAACCTTAGTTTTGTTCCCTCGGGACTTACTTGTGGTTCCTGTGGTGCACTCCTGACCCTGCTGCTTTGAAAGAA	354
	22	>1-36	AAAGAAATGAGGCGAAGAAGTCCTTCAGGGATCCCCGGGGAAACCTGGAGGAAGTCCGACGAGATCGCGGCTGGGGCTTAGGACCCCACTCCTGCGAGACAGGAGTAATCCTAAACAGGGCTTTCACCCTTCCTTTAGTTTCCTTCCTCTCCTGGAGAGGTCTTCTGCCCTAGCCCGGTCTTCGAAGCTTCCTTTGGCTACTACCCGGTGGAAACAGCTGAAGCTTCAACGCCTTTTTTTCCAATCTTCTTTAGCACCGGGCTAGGGAGTAAGCCCGTGGAACCTTAGTTTTGTTCCCTCGGGACTTACTTGTGGTTCCTGTGGTGCACTCCTGACCCTGCTGCTTTGAAAGAA	354
3. Yes Song	1	>2-1	AAAGAAATGAGGCGAAGAAGTCCTTCAGGGATCCCCGGGGAAACCTGGAGGAAGTCCGACGAGATCGCGGCTGGGGCTTAGGACCCCACTCCTGCGAGACAGGAGTAATCCTAAACAGGGTTTTCACCCTTCCTTTAGTTTCCTTCCTCTCCTGGAGAGGTCTTCTGCCCTAGCCCGGTCTTCGAAGCTTCCTTTGGCTACTACCCGGTGGAAACAACTGAAGCTTCAACGCCTTTTTTTCCAATCTTCTTTAGCACCGGGCTAGGGAGTAAGCCCGTGGAACCTTAGTTTTGTTCCCTCGGGACTTACTTGTGGTTCCTGTGGTGCACTCCTGACCCTGCTGCTTTGAAAGAA	354
	2	>2-2	AAAGAAATGAGGCGAAGAAGTCCTTCAGGGATCCCCGGGGAAACCTGGAGGAAGTCCGACGAGATCGCGGCTGGGGCTTAGGACCCCACTCCTGCGAGACAGGAGTAATCCTAAACAGGGTTTTCACCCTTCCTTTAGTTTCCTTCCTCTCCTGGAGAGGTCTTCTGCCCTAGCCCGGTCTTCGAAGCTTCCTTTGGCTACTACCCGGTGGAAACAACTGAAGCTTCAACGCCTTTTTTTCCTATCTTCTTTAGCACCGGGCTAGGGAGTAAGCCCGTGGAACCTTAGTCTTGTTCCCTCGGGACTTACTTGTGGTTCCTGTGGTGCACTCCTGACCCTGCTGCTTTGAAAGAA	354
	3	>2-3	AAAGAAATGAGGCGAAGAAGTCCTTCAGGGATCCCCGGGGAAACCTGGAGGAAGTCCGACGAGATCGCGGCTGGGGCTTAGGACCCCACTCCTGCGAGACAGGAGTAATCCTAAACAGGGTTTTCACCCTTCCTTTAGTTTCCTTCCTCTCCTGGAGAGGTCTTCTGCCCTAGCCCGGTCTTCGAAGCTTCCTTTGGCTACTACCCGGTGGAAACAACTGAAGCTTCAACGCCTTTTTTTCCAATCTTCTTTAGCACCGGGCTAGGGAGTAAGCCCGTGGAACCTTAGTTTTGTTCCCTCGGGACTTACTTGTGGTTCCTGTGGTGCACTCCTGACCCTGCTGCTTTGAAAGAA	354
	4	>2-4	AAAGAAATGAGGCGAAGAAGTCCTTCAGGGATCCCCGGGGAAACCTGGAGGAAGTCCGACGAGATCGCGGCTGGGGCTTAGGACCCCACTCCTGCGAGACAGGAGTAATCCTAAACAGGGTTTTCACCCTTCCTTTAGTTTCCTTCCTCTCCTGGAGAGGTCTTCTGCCCTAGCCCGGTCTTCGAAGCTTCCTTTGGCTACTACCCGGTGGAAACAACTGAAGCTTCAACGCCTTTTTTTCCTATCTTCTTTAGCACCGGGCTAGGGAGTAAGCCCGTGGAACCTTAGTTTTGTTCCCTCGGGACTTACTTGTGGTTCCTGTGGTGCACTCCTGACCCTGCTGCTTTGAAAGAA	354
	5	>2-6	AAAGAAATGAGgCGAAGAAGTCCTTCAGGGATCCCCGGGGAAACCTGGAGGAAGTCCGACGAGATCGCGGCTGGGGCTTAGGACCCCACTCCTGCGAGACAGGAGTAATCCTAAACAGGGTTTTCACCCTTCCTTTAGTTTCCTTCCTCTCCTGGAGAGGTCTTCTGCCCTAGCCCGGTCTTCGAAGCTTCCTTTGGCTACTACCCGGTGGAAACAACTGAAGCTTCAACGCCTTTTTTTCCTATCTTCTTTAGCACCGGGCTAGGGAGTAAGCCCGTGGAACCTTAGTTTTGTTCCCTCGGGACTTACTTGTGGTTCCTGTGGTGCACTCCTGACCCTGCTGCTTTGAAAGAA-	355
	6	>2-7	AAAGAAATGAGGCGAAGAAGTCCTTCAGGGATCCCCGGGGAAACCTGGAGGAAGTCCGACGAGATCGCGGCTGGGGCTTAGGACCCCACTCCTGCGAGACAGGAGTAATCCTAAACAGGGTTTTCACCCTTCCTTTAGTTTCCTTCCTCTCCTGGAGAGGTCTTCTGCCCTAGCCCGGTCTTCGAAGCTTCCTTTGGCTACTACCCGGTGGAAACAACTGAAGCTTCAACGCCTTTTTTTCCTATCTTCTTTAGCACCGGGCTAGGGAGTAAGCCCGTGGAACCTTAGTTTTGTTCCCTCGGGACTTACTTGTGGTTCCTGTGGTGCACTCCTGACCCTGCTGCTTTGAAAGAA	354
	7	>2-9	AAAGAAATGAGGCGAAGAAGTCCTTCAGGGATCCCCGGGGAAACCTGGAGGAAGTCCGACGAGATCGCGGCTGGGGCTTAGGACCCCACTCCTGCGAGACAGGAGTAATCCTAAACAGGGTTTTCACCCTTCCTTTAGTTTCCTTCCTCTCCTGGAGAGGTCTTCTGCCCTAGCCCGGTCTTCGAAGCTTCCTTTGGCTACTACCCGGTGGAAACAACTGAAGCTTCAACGCCTTTTTTTCCAATCTTCTTTAGCACCGGGCTAGGGAGTAAGCCCGTGGAACCTTAGTTTTGTTCCCTCGGGACTTACTTGTGGTTCCTGTGGTGCACTCCTGACCCTGCTGCTTTGAAAGAA	354
	8	>2-11	AAAGAAATGAGGCGAAGAAGTCCTTCAGGGATCCCCGGGGAAACCTGGAGGAAGTCCGACGAGATCGCGGCTGGGGCTTAGGACCTCACTCCTGCGAGACAGGAGTAATCCTAAACAGGGTTTTCACCCTTCCTTTAGTTTCCTTCCTCTCCTGGAGAGGTCTTCTGCCCTAGCCCGGTCTTCGAAGCTTCCTTTGGCTACTACCCGGTGGAAACAACTGAAGCTTCAACGCCTTTTTTTCCTATCTTCTTTAGCACCGGGCTAGGGAGTAAGCCCGTGGAACCTTAGCTTTGTTCCCTCGGGACTTACTTGTGGTTCCTGTGGTGCACTCCTGACCCTGCTGCTTTGAAAGAA	354
	9	>2-12	AAAGAAATGAGGCGAAGAAGTCCTTCAGGGATCCCCGGGGAAACCTGGAGGAAGTCCGACGAGATCGCGGCTGGGGCTTAGGACCCCACTCCTGCGAGACAAGAGTAATCCTAAACAGGGTTTTCACCCTTCCTTTAGTTTCCTTCCTCTCCTGGAGAGGTCTTCTGCCCTAGCCCGGTCTTCGAAGCTTCCTTTGGCTACTACCCGGTGGAAACAACTGAAGCTTCAACGCCTTTTTTTCCAATCTTCTTTAGCACCGGGCTAGGGAGTAAGCCCGTGGAACCTTAGTTTTGTTCCCTCGGGACTTACTTGTGGTTCCTGTGGTGCACTCCTGACCCTGCTGCTTTGAAAGAA	354
	10	>2-15	AAAGAAATGAGGCGAAGAAGTCCTTCAGGGATCCCCGGGGAAACCTGGAGGAAGTCCGACGAGATCGCGGCTGGGGCTTAGGACCCCACTCCTGCGAGACAGGAGTAATCCTAAACAGGGTTTTCACCCTTCCTTTAGTTTCCTTCCTCTCCTGGAGAGGTCTTCTGCCCTAGCCCGGTCTTCGAAGCTTCCTTTGGCTACTACCCGGTGGAAACAACTGAAGCTTCAACGCCTTTTTTTCCAATCTTCTTTAGCACCGGGCTAGGGAGTAAGCCCGTGGAACCTTAGTTTTGTTCCCTCGGGACTTACTTGTGGTTCCTGTGGTGCACTCCTGACCCTGCTGCTTTGAAAGAA	354
	11	>2-17	AAAGAAATGAGGCGAAGAAGTCCTTCAGGGATCCCCGGGGAAACCTGGAGGAAGTCCGACGAGATCGCGGCTGGGGCTTAGGACCCCACTCCTGCGAGACAGGAGTAATCCTAAACAGGGTTTTCACCCTTCCTTTAGTTTCCTTCCTCTCCTGGAGAGGTCTTCTGCCCTAGCCCGGTCTTCGAAGCTTCCTTTGGCTACTACCCGGTGGAAACAACTGAAGCTTCAACGCCTTTTTTTCCAATCTTCTTTAGCACCGGGCTAGGGAGTAAGCCCGTGGAACCTTAGTTTTGTTCCCTCGGGACTTACTTGTGGTTCCTGTGGTGCACTCCTGACCCTGCTGCTTTGAAAGAA	354
	12	>2-18	AAAGAAATGAGGCGAAGAAGTCCTTCAGGGATCCCCGGGGAAACCTGGAGGAAGTCCGACGAGATCGCGGCTGGGGCTTAGGACCCCACTCCTGCGAGACAGGAGTAATCCTAAACAGGGTTTTCACCCTTCCTTTAGTTTCCTTCCTCTCCTGGAGAGGTCTTCTGCCCTAGCCCGGTCTTCGAAGCTTCCTTTGGCTACTACCCGGTGGAAACAACTGAAGCTTCAACGCCTTTTTTTCCAATCTTCTTTAGCACCGGGCTAGGGAGTAAGCCCGTGGAACCTTAGTTTTGTTCCCTCGGGACTTACTTGTGGTTCCTGTGGTGCACTCCTGACCCTGCTGCTTTGAAAGAA	354
	13	>2-19	AAAGAAATGAGGCGAAGAAGTCCTTCAGGGATCCCCGGGGAAACCTGGAGGAAGTCCGACGAGATCGCGGCTGGGGCTTAGGACCCCACTCCTGCGAGACAGGAGTAATCCTAAACAGGGTTTTCACCCTTCCTTTAGTTTCCTTCCTCTCCTGGAGAGGTCTTCTGCCCTAGCCCGGTCTTCGAAGCTTCCTTTGGCTACTACCCGGTGGAAACAACTGAAGCTTCAACGCCTTTTTTTCCAATCTTCTTTAGCACCGGGCTAGGGAGTAAGCCCGTGGAACCTTAGTTTTGTTCCCTCGGGACTTACTTGTGGTTCCTGTGGTGCACTCCTGACCCTGCTGCTTTGAAAGAA	354
	14	>2-20	AAAGAAATGAGGCGAAGAAGTCCTTCAGGGATCCCCGGGGAAACCTGGAGGAAGTCCGACGAGATCGCGGCTGGGGCTTAGGACCCCACTCCTGCGAGACAGGAGTAATCCTAAACAGGGTTCTCACCCTTCCTTTAGTTTCCTTCCTCTCCTGGGGAGGTCTTCTGCCCTAGCCCGGTCTTCGAAGCTTCCTTTGGCTACTACCCGGTGGAAACAACTGAAGCTTCAACGCCTTTTTTTCCAATCTTCTTTAGCACCGGGCTAGGGAGTAAGCCCGTGGAACCTTAGTTTTGTTCCCTCGGGACTTACTTGTGGTTCCTGTGGTGCACTCCTGACCCTGCTGCTTTGAAAGAA	354
	15	>2-22	AAAGAAATGAGGCGAAGAAGTCCTTCAGGGATCCCCGGGGAAACCTGGAGGAAGTCCGACGAGATCGCGGCTGGGGCTTAGGACCCCACTCCTGCGAGACAGGAGTAATCCTAAACAGGGTTTTCACCCTTCCTTTAGTTTCCTTCCTCTCCTGGAGAGGTCTTCTGCCCTAGCCCGGTCTTCGAAGCTTCCTTTGGCTACTACCCGGTGGAAACAACTGAAGCTTCAACGCCTTTTTTTCCAATCTTCTTTAGCACCGGGCTAGGGAGTAAGCCCGTGGAACCTTAGTTTTGTTCCCTCGGGACTTACTTGTGGTTCCTGTGGTGCACTCCTGACCCTGCTGCTTTGAAAGAA	354
	16	>2-23	AAAGAAATGAGGCGAAGAAGTCCTTCAGGGATCCCCGGGGAAACCTGGAGGAAGTCCGACGAGATCGCGGCTGGGGCTTAGGACCCCACTCCTGCGAGACAGGAGTAATCCTAAACAGGGTTTTCACCCTTCCTTTAGTTTCCTTCCTCTCCTGGAGAGGTCTTCTGCCCTAGCCCGGTCTTCGAAGCTTCCTTTGGCTATTACCCGGTGGAAACAACTGAAGCTTCAACGCCTTTTTTTCCTATCTTCTTTAGCACCGGGCTAGGGAGTAAGCCCGTGGAACCTTAGTTTTGTTCCCTCGGGACTTACTTGTGGTTCCTGTGGTGCACTCCTGACCCTGCTGCTTTGAAAGAA	354
	17	>2-24	AAAGAAATGAGGCGAAGAAGTCCTTCAGGGATCCCCGGGGAAACCTGGAGGAAGTCCGACGAGATCGCGGCTGGGGCTTAGGACCCCACTCCTGCGAGACAGGAGTAATCCTAAACAGGGTTTTCACCCTTCCTTTAGTTTCCTTCCTCTCCTGGAGAGGTCTTCTGCCCTAGCCCGGTCTTCGAAGCTTCCTTTGGCTACTACCCGGTGGAAACAACTGAAGCTTCAACGCCTTTTTTTCCAATCTTCTTTAGCACCGGGCTAGGGAGTAAGCCCGTGGAACCTTAGTTTTGTTCCCTCGGGACTTACTTGTGGTTCCTGTGGTGCACTCCTGACCCTGCTGCTTTGAAAGaa--	356
	18	>2-25	AAAGAAATGAGGCGAAGAAGTCCTTCAGGGATCCCCGGGGAAACCTGGAGGAAGTCCGACGAGATCGCGGCTGGGGCTTAGGACCCCACTCCTGCGAGACAGGAGTAATCCTAAACAGGGTTTTCACCCTTCCTTTAGTTTCCTTCCTCTCCTGGAGAGGTCTTCTGCCCTAGCCCGGTCTTCGAAGCTTCCTTTGGCTACTACCCGGTGGAAACAACTGAAGCTTCAACGCCTTTTTTTCCTATCTTCTTTAGCACCGGGCTAGGGAGTAAGCCCGTGGAACCTTAGTTTTGTTCCCTCGGGACTTACTTGTGGTTCCTGTGGTGCACTCCTGACCCTGCTGCTTTGaAAGAA	354
	19	>2-26	AAAGAAATGAGGCGAAGAAGTCCTTCAGGGATCCCCGGGGAAACCTGGAGGAAGTCCGACGAGATCGCGGTTGGGGCTTAGGACCCCACTCCTGCGAGACAGGAGTAATCCTAAACAGGGTTTTCACCCTTCCTTTAGTTTCCTTCCTCTCCTGGAGAGGTCTTCTGCCCTAGCCCGGTCTTCGAAGCTTCCTTTGGCTACTACCCGGTGGAAACAACTGAAGCTTCAACGCCTTTTTTTCCAATCTTCTTTAGCACCGGGCTAGGGAGTAAGCCCGTGGAACCTTAGTTTTGTTCCCTCGGGACTTACTTGTGGTTCCTGTGGTGCACTCCTGACCCTGCTGCTTTGAAAGAA	354
	20	>2-27	AAAGAAATGAGGCGAAGAAGTCCTTCAGGGATCCCCGGGGAAACCTGGAGGAAGTCCGACGAGATCGCGGCTGGGGCTTAGGACCCCACTCCTGCGAGACAGGAGTAATCCTAAACAGGGTTTTCACCCTTCCTTTAGTTTCCTTCCTCTCCTGGAGAGGTCTTCTGCCCTAGCCCGGTCTTCGAAGCTTCCTTTGGCTACTACCCGGTGGAAACAACTGAAGCTTCAACGCCTTTTTTTCCAATCTTCTTTAGCACCGGGCTAGGGAGTAAGCCCGTGGAACCTTAGTTTTGTTCCCTCGGGACTTACTTGTGGTTCCTGTGGTGCACTCCTGACCCTGCTGCTTTGAAAGAA	354
	21	>2-30	AAAGAAATGAGGCGAAGAAGTCCTTCAGGGATCCCCGGGGAAACCTGGAGGAAGTCCGACGAGATCGCGGCTGGGGCTTAGGACCCCACTCCTGCGAGACAGGAGTAATCCTAAACAGGGTTTTCACCCTTCCTTTAGTTTCCTTCCTCTCCTGGAGAGGTCTTCTGCCCTAGCCCGGTCTTCGAAGCTTCCTTTGGCTACTACCCGGTGGAAACAACTGAAGCTTCAACGCCTTTTTTTCCAATCTTCTTTAGCACCGGGCTAGGGAGTAAGCCCGTGGAACCTTAGTTTTGTTCCCTCGGGACTTACTTGTGGTTCCTGTGGTGCACTCCTGACCCTGCTGCTTTGAAAGAA	354
	22	>2-31	AAAGAAATGAGGCGAAGAAGTCCTTCAGGGATCCCCGGGGAAACCTGGAGGAAGTCCGACGAGATCGCGGCTGGGGCTTAGGACCCCACTCCTGCGAGACAGGAGTAATCCTAAACAGGGTTTTCACCCTTCCTTTAGTTTCCTTCCTCTCCTGGAGAGGTCTTCTGCCCTAGCCCGGTCTTCGAAGCTTCCTTTGGCTACTACCCGGTGGAAACAACTGAAGCTTCAACGCCTTTTTTTCCTATCTTCTTTAGCACCGGGCTAGGGAGTAAGCCCGTGGAACCTTAGTTTTGTTCCCTCGGGACTTACTTGTGGTTCCTGTGGTGCACTCCTGACCCTGCTGCTTTGAAAGAA	354
4. Yellow Cap	1	>3-1	AAAGAAATGAGGCGAAGAAGTCCTTCAGGGATCCCCGGGGAAACCTGGAGGAAGTCCGACGAGATCGCGGCTGGGGCTTAGGACCCCACTCCTGCGAGACAGGGGTAATCCTAAACAGGGTTTTCACCCTTCCTTTAGTTTCCTTCCTCTCCTGGAGAGGTCTTCTGCCCTAGCCCGGTCTTCGAAGCTTCCTTTGGCTACTACCCGGTGGAAACAACTGAAGCTTCAACGCCTTTTTTTCCAATCTTCTTTAGCACCGGGCTAGGGAGTAAGCCCGTGGAACCTTAGTTTTGTTCCCTCGGGACTTACTTGTGGTTCCTGTGGTGCACTCCTGACCCTGCTGCTTTGAAAGAA	354
	2	>3-2	AAAGAAATGAGGCGAAGAAGTCCTTCAGGGATCCCCGGGGAAACCTGGAGGAAGTCCGACGAGATCGCGGCTGGGGCTTAGGACCCCACTCCTGCGAGACAGGAGTAATCCTAAACAGGGTTTTCACCCTTCCTTTAGTTTCCTTCCTCTCCTGGAGAGGTCTTCTGCCCTAGCCCGGTCTTCGAAGCTTCCTTTGGCTACTACCCGGTGGAAACAACTGAAGCTTCAACGCCTTTTTTTCCAATCTTCTCTAGCACCGGGCTAGGGAGTAAGCCCGTGGAACCTTAGTTTTGTTCCCTCGGGACTTACTTGTGGTTCCTGTGGTGCACTCCTGACCCTGCTGCTTTGAAAGAA	354
	3	>3-3	AAAGAAATGAGGCGAAGAAGTCCTTCAGGGATCCCCGGGGAAACCCGGAGGAAGTCCGACGAGATCGCGGCTGGGGCTTAGGACCCCACTCCTGCGAGACAGGAGTAATCCTAAACAGGGTTTTCACCCTTCCTTTAGTTTCCTTCCTCTCCTGGAGAGGTCTTCTGCCCTAGCCCGGTCTTCGAAGCTTCCTTTGGCTACTACCCGGTGGAAACAACTGAAGCTTCAACGCCTTTTTTTCCTATCTTCTTTAGCACCGGGCTAGGGAGTAAGCCCGTGGAACCTTAGTTTTGTTCCCTCGGGACTTACTTGTGGTTCCTGTGGTGCACTCCTGACCCTGCTGCTTTGAAAGAA	354
	4	>3-4	AAAGAAATGAGGCGAAGAAGTCCTTCAGGGATCCCCGGGGAAACCTGGAGGAAGTCCGACGAGATCGCGGCTGGGGCTTAGGACCCCACTCCTGCGAGACAGGAGTAATCCTAAACAGGGTTTTCACCCTTCCTTTAGTTTCCTTCCTCTCCTGGAGAGGTCTTCTGCCCTAGCCCGGTCTTCGGAGCTTCCTTTGGCTACTACCCGGTGGAAACAACTGAAGCTTCAACGCCTTTTTTTCCTATCTTCTTTAGCACCGGGCTAGGGAGTAAGCCCGTGGAACCTTAGTTTTGTTCCCTCGGGACTTACTTGTGGTTCCTGTGGTGCACTCCTGACCCTGCTGCTTTGAAAGAA	354
	5	>3-5	AAAGAAATGAGGCGAAGAAGTCCTTCAGGGATCCCCGGGGAAACCTGGAGGAAGTCCGACGAGATCGCGGCTGGGGCTTAGGACCCCACTCCTGCGAGACGGGAGTAATCCTAAACAGGGTTTTCACCCTTCCTTTAGTTTCCTTCCTCTCCTGGAGAGGTCTTCTGCCCTAGCCCGGTCTTCGAAGCTTCCTTTGGCTATTACCCGGTGGAAACAACTGAAGCTTCAACGCCTTTTTTTCCTATCTTCTTTAGCACCGGGCTAGGGAGTAAGCCCGTGGAACCTTAGTTTTGTTCCCTCGGGACTTACTTGTGGTTCCTGTGGTGCACTCCTGACCCTGCTGCTTTGAAAGAA	354
	6	>3-6	AAAGAAATGAGGCGAAGAAGTCCTTCAGGGATCCCCGGGGAAACCTGGAGGAAGTCCGACGAGATCGCGGCTGGGGCTTAGGATCCCACTCCTGCGAGACAGGAGTAATCCTAAACAGGGTTTTCACCCTTCCTTTAGTTTCCTTCCTCTCCTGGAGAGGTCTTCTGCCCTAGCCCGGTCTTCGAAGCTTCCTTTGGCTATTACCCGGTGGAAACAACTGAAGCTTCAACGCCTTTTTTTCCTATCTTCTTTAGCACCGGGCTAGGGAGTAAGCCCGTGGAACCTTAGTTTTGTTCCCTCGGGACTTACTTGTGGTTCCTGTGGTGCACTCCTGACCCTGCTGCTTTGAAAGAA	354
	7	>3-7	AAAGAAATGAGGCGAAGAAGTCCTTCAGGGTTCCCCGGGGAAACCTGGAGGAAGTCCGACGAGATCGCGGCTGGGGCTTAGGACCCCACTCCTGCGAGACAGGAGTAATCCTAAACAGGGTTTTCACCCTTCCTTTAGTTTCCTTCCTCTCCTGGAGAGGTCTTCTGCCCTAGCCCGGTCTTCGAAGCTTCCTTTGGCTACTACCCGGTGGAAACAACTGAAGCTTCAACGCCTTTTTTTCCAATCTTCTTTAGCACCGGGCTAGGGAGTAAGCCCGTGGAACCTTAGTTTTGTTCCCTCGGGACTTACTTGTGGTTCCTGTGGTGCACTCCTGACCCTGCTGCTTTGAAAGAA	354
	8	>3-8	AAAGAAATGAGGCGAAGAAGTCCTTCAGGGATCCCCGGGGAAACCCGGAGGAAGTCCGACGAGATCGCGGCTGGGGCTTAGGACCCCACTCCTGCGAGACAGGAGTAATCCTAAACAGGGTTTTCACCCTTCCTTTAGTTTCCTTCCTCTCCTGGAGAGGTCTTCTGCCCTAGCCCGGTCTTCGAAGCTTCCTTTGGCTACTACCCGGTGGAAACAACTGAAGCTTCAACGCCTTTTTTTCCTATCTTCTTTAGCACCGGGCTAGGGAGTAAGCCCGTGGAACCTTAGTTTTGTTCCCTCGGGACTTACTTGTGGTTCCTGTGGTGCACTCCTGACCCTGCTGCTTTGAAAGAA	354
	9	>3-9	AAAGAAATGAGGCGAAGAAGTCCTTCAGGGATCCCCGGGGAAACCTGGAGGAAGTCCGACGAGATCGCGGCTGGGGCTTAGGACCCCACTCCTGCGAGACAGGAGTAATCCTAAACAGGGTTTTCACCCTTCCTTTAGTTTCCTTCCTCTCCTGGAGAGGTCTTCTGCCCTAGCCCGGTCTTCGAAGCTTCCTTTGGCTACTACCCGGTGGAAACAACTGAAGCTTCAACGCCTTTTTTTCCAATCTTCTTTAGCACCGGGCTAGGGAGTAAGCCCGTGGAACCTTAGTTTTGTTCCCTCGGGACTTACTTGTGGTTCCTGTGGTGCACTCCTGACCCTGCTGCTTTGAAAGAA	354
	10	>3-12	AAAGAAATGAGGCGAAGAAGTCCTTCAGGGATCCCCGGGGAAACCTGGAGGAAGTCCGACGAGATCGCGGCTGGGGCTTAGGACCCCACTCCTGCGAGACAGGAGTAATCCTAAACAGGGTTTTCACCCTTCCTTTAGTTTCCTTCCTCTCCTGGAGAGGTCTTCTGCCCTAGCCCGGTCTTCGAAGCTTCCTTTGGCTACTACCCGGTGGAAACAACTGAAGCTTCAACGCCTTTTTTTCCTATCTTCTTTAGCACCGGGCTAGGGAGTAAGCCCGTGGAACCTTAGTTTTGTTCCCTCGGGACTTACTTGTGGTTCCTGTGGTGCACTTCTGACCCTGCTGCTTTGAAAGAA	354
	11	>3-15	AAAGAAATGAGGCGAAGAAGTCCTTCAGGGATCCCCGGGGAAACCTGGAGGAAGTCCGACGAGATCGCGGCTGGGGCTTAGGACCCCACTCCTGCGAGACAGGAGTAATCCTAAACAGGGTTTTCACCCTTCCTTTAGTTTCCTTCCTCTCCTGGAGAGGTCTTCTGCCCTAGCCCGGTCTTCGAAGCTTCCTTTGGCTACTACCCGGTGGAAACAACTGAAGCTTCAACGCCTTTTTTTCCTATCTTCTTTAGCACCGGGCTAGGGAGTAAGCCCGTGGAACCTTAGTTTTGTTCCCTCGGGACTTACTTGTGGTTCCTGTGGTGCACTCCTGACCCTGCTGCTTTGAAAGAA	354
	12	>3-16	AAAGAAATGAGGCGAAGAAGTCCTTCAGGGATCCCCGGGGAAACCTGGAGGAAGTCCGACGAGATCGCGGCTGGGGCTTAGGACCCCACTCCTGCGAGACAGGAGTAATCCTAAACAGGGTTTTCACCCTTCCTTTAGTTTCCTTCCTCTCCTGGAGAGGTCTTCTGCCCTAGCCCGGTCTTCGAAGCTTCCTTTGGCTACTACCCGGTGGAAACAACTGAAGCTTCAACGCCTTTTTTTCCTATCTTCTTTAGCACCGGGCTAGGGAGTAAGCCCGTGGAACCTTAGTTTTGTTCCCTCGGGACTTACTTGTGGTTCCTGTGGTGCACTCCTGACCCTGCTGCTTTGAAAGAA	354
	13	>3-17	AAAGAAATGAGGCGAAGAAGTCCTTCAGGGATCCCCGGGGAAACCCGGAGGAAGTCCGACGAGATCGCGGCTGGGGCTTAGGACCCCACTCCTGCGAGACAGGAGTAATCCTAAACAGGGTTTTCACCCTTCCTTTAGTTTCCTTCCTCTCCTGGAGAGGTCTTCTGCCCTAGCCCGGTCTTCGAAGCTTCCTTTGGCTACTACCCGGTGGAAACAACTGAAGCTTCAACGCCTTTTTTTCCTATCTTCTTTAGCACCGGGCTAGGGAGTAAGCCCGTGGAACCTTAGTTTTGTTCCCTCGGGACTTACTTGTGGTTCCTGTGGTGCACTCCTGACCCTGCTGCTTTGAAAGAA	354
	14	>3-18	AAAGAAATGAGGCGAAGAAGTCCTTCAGGGATCCCCGGGGAAACCTGGAGGAAGTCCGACGAGATCGCGGCTGGGGCTTAGGACCCCACTCCTGCGAGACAGGGGTAATCCTAAACAGGGTTTTCACCCTTCCTTTAGTTTCCTTCCTCTCCTGGAGAGGTCTTCTGCCCTAGCCCGGTCTTCGAAGCTTCCTTTGGCTACTACCCGGTGGAAACAACTGAAGCTTCAACGCCTTTTTTTCCAATCTTCTTTAGCACCGGGCTAGGGAGTAAGCCCGTGGAACCTTAGTTTTGTTCCCTCGGGACTTACTTGTGGTTCCTGTGGTGCACTCCTGACCCTGCTGCTTTGAAAGAA	354
	15	>3-19	AAaGAAATGAGGCGAAGAAGTCCTTCAGGGATCCCCGGGGAAACCTGGAGGAAGTCCGACGAGATCGCGGCTGGGGCTTAGGACCCCACTCCTGCGAGACAGGAGTAATCCTAAACAGGGTTTTCACCCTTCCTTTAGTTTCCTTCCTCTCCTGGAGAGGTCTTCTGCCCTAGCCCGGTCTTCGAAGCTTCCTTTGGCTACTACCCGGTGGAAACAACTGAAGCTTCAACGCCTTTTTTTCCTATCTTCTTTAGCACCGGGCTAGGGAGTAAGCCCGTGGAACCTTAGTTTTGTTCCCTCGGGACTTACTTGTGGTTCCTGTGGTGCACTCCTGACCCTGCTGCTTTGAAAGAA	354
	16	>3-20	AAAGAAATGAGGCGAAGAAGTCCTTCAGGGATCCCCGGGGAAACCTGGAGGAAGTCCGACGAGATCGCGGCTGGGGCTTAGGACCCCACTCCTGCGAGACAGGAGTAATCCTAAACAGGGTTTTCACCCTTCCTTTAGTTTCCTTCCTCTCCTGGAGAGGTCTTCTGCCCTAGCCCGGTCTTCGAAGCTTCCTTTGGCTATTACCCGGTGGAAACAACTGAAGCTTCAGCGCCTTTTTTTCCTATCTTCTTTAGCACCGGGCTAGGGAGTAAGCCCGTGGAACCTTAGTTTTGTTCCCTCGGGACTTACTTGTGGTTCCTGTGGTGCACTCCTGACCCTGCTGCTTTGAAAGAA	354
	17	>3-21	AAaGAAATGAGGCGAAGAAGTCCTTCAGGGATCCCCGGGGAAACCTGGAGGAAGTCCGACGAGATCGCGGCTGGGGCTTAGGACCCCACTCCTGCGAGACAGGAGTAATCCTAAACAGGGTTTTCACCCTTCCTTTAGTTTCCTTCCTCTCCTGGAGAGGTCTTCTGCCCTAGCCCGGTCTTCGAAGCTTCCTTTGGCTACTACCCGGTGGAAACAACTGAAGCTTCAACGCCTTTTTTTCCAATCTTCTTTAGCACCAGGCTAGGGAGTAAGCCCGTGGAACCTTAGTTTTGTTCCCTCGGGACTTACTTGTGGTTCCTGTGGTGCACCCCTGACCCTGCTGCTTTGAAAGAA	354
	18	>3-22	AAAGAAATGAGGCGAAGAAGTCCTTCAGGGATCCCCGGGGAAACCCGGAGGAAGTCCGACGAGATCGCGGCTGGGGCTTAGGACCCCACTCCTGCGAGACAGGAGTAATCCTAAACAGGGTTTTCACCCTTCCTTTAGTTTCCTTCCTCTCCTGGAGAGGTCTTCTGCCCTAGCCCGGTCTTCGAAGCTTCCTTTGGCTACTACCCGGTGGAAACAACTGAAGCTTCAACGCCTTTTTTTCCTATCTTCTTTAGCACCGGGCTAGGGAGTAAGCCCGTGGAACCTTAGTTTTGTTCCCTCGGGACTTACTTGTGGTTCCTGTGGTGCACTCCTGACCCTGCTGCTTTGAAAGAA	354
	19	>3-25	AAAGAAATGAGGCGAAGAAGTCCTTCAGGGATCCCCGGGGAAACCTGGAGGAAGTCCGACGAGATCGCGGCTGGGGCTTAGGACCCCACTCCTGCGAGACAGGAGTAATCCTAAACAGGGTTTTCACCCTTCCTTTAGTTTCCTTCCTCTCCTGGAGAGGTCTTCTGCCCTAGCCCGGTCTTCGAAGCTTCCTTTGGCTACTACCCGGTGGAAACAACTGAAGCTTCAACGCCTTTTTTTCCAATCTTCTTTAGCACCGGGCTAGGGAGTAAGCCCGTGGAACCTTAGTTTTGTTCCCTCGGGACTTACTTGTGGTTCCTGTGGTGCACTCCTGACCCTGCTGCTTTGAAAGAA	354
	20	>3-26	AAAGAAATGAGGCGAAGAAGTCCTTCAGGGATCCCCGGGGAAACCTGGAGGAAGTCCGACGAGATCGCGGCTGGGGCTTAGGACCCCACTCCTGCGAGACAGGGGTAATCCTAAACAGGGTTTTCACCCCTCCTTTAGTTTCCTTCCTCTCCTGGAGAGGTCTTCTGCCCTAGCCCGGTCTTCGAAGCTTCCTTTGGCTACTACCCGGTGGAAACAACTGAAGCTTCAACGCCTTTTTTTCCAATCTTCTTTAGCACCGGGCTAGGGAGTAAGCCCGTGGAACCTTAGTTTTGTTCCCTCGGGACTTACTTGTGGTTCCTGTGGTGCACTCCTGACCCTGCTGCTTTGAAAGAA	354
	21	>3-27	AAAGAAATGAGGCGAAGAAGTCCTTCAGGGATCCCCGGGGAAACCTGGAGGAAGTCCGACGAGATCGCGGCTGGGGCTTAGGACCCCACTCCTGCGAGACAGGAGTAATCCTAAACAGGGTTTTCACCCTTCCTTTAGTTTCCTTCCTCTCCTGGAGAGGTCTTCTGCCCTAGCCCGGTCTTCGAAGCTTCCTTTGGCTACTACCCGGTGGAAACAACTGAAGCTTCAACGCCTTTTTTTCCTATCTTCTTTAGCACCGGGCTAGGGAGTAAGCCCGTGGAACCTTAGTTTTGTTCCCTCGGGACTTACTTGTGGTTCCTGTGGTGCACTCCTGACCCTGCTGCTTTGAAAGAA	354
	22	>3-28	AAAGAAATGAGGCGAAGAAGTCCTTCAGGGATCCCCGGGGAAACCCGGAGGAAGTCCGACGAGATCGCGGCTGGGGCTTAGGACCCCACTCCTGCGAGACAGGAGTAATCCTAAACAGGGTTTTCACCCTTCCTTTAGTTTCCTTCCTCTCCTGGAGAGGTCTTCTGCCCTAGCCCGGTCTTCGAAGCTTCCTTTGGCTACTACCCGGTGGAAACAACTGAAGCTTCAACGCCTTTTTTTCCTATCTTCTTTAGCACCGGGCTAGGGAGTAAGCCCGTGGAACCTTAGTTTTGTTCCCTCGGGACTTACTTGTGGTTCCTGTGGTGCACTCCTGACCCTGCTGCTTTGAAAGAA	354
	23	>3-29	AAAGAAATGAGGCGAAGAAGTCCTTCAGGGATCCCCGGGGAAACCTGGAGGAAGTCCGACGAGATCGCGGCTGGGGCTTAGGACCCCACTCCTGCGAGACAGGAGTAATCCTAAACAGGGTTTTCACCCTTCCTTTAGTTTCCTTCCTCTCCTGGAGAGGTCTTCTGCCCTAGCCCGGTCTTCGAAGCTTCCTTTGGCTATTACCCGGTGGAAACAACTGAAGCTTCAACGCCTTTTTTTCCTATCTTCTTTAGCACCGGGCTAGGGAGTAAGCCCGTGGAACCTTAGTTTTGTTCCCTCGGGACTTACTTGTGGTTCCTGTGGTGCACTCCTGACCCTGCTGCTTTGAAAGAA	354
5. Shinma_China	1	>4-1	AAAGAAATGAGGCGAAGAAGTCCTTCAGGGATCCCCGGGGAAACCTGGAGGAAGTCCGACGAGATCGCGGCTGGGGCTTAGGACCCCACTCCTGCGAGACAGGAGTAATCCTAAACAGGGTTTTCACCCTTCCTTTAGTTTCCTTCCTCTCCTGGAGAGGTCTTCTGCCCTAGCCCGGTCTTCGAAGCTTCCTTTGGCTACTACCCGGTGGAAACAACTGAAGCTTCAACGCCTTTTTTTCCAATCTTCTTTAGCACCGGGCCAGGGAGTAAGCCCGTGGAACCTTAGTTTTGTTCCCTCGGGACTTACTTGTGGTTCCTGTGGTGCACTCCTGACCCTGCTGCTTTGAAAGAA	354
	2	>4-2	AAAGAAATGAGGCGAAGAAGTCCTTCAGGGATCCCCGGGGAAACCTGGAGGAAGTCCGACGAGATCGCGGCTGGGGCTTAGGACCCCACTCCTGCGAGACAGGAGTAATCCTAAACAGGGTTTTCACCCTTCCTTTAGTTTCCTTCCTCTCCTGGAGAGGTCTTCTGCCCTAGCCCGGTCTTCGAAGCTTCCTTTGGCTACTACCCGGTGGAAACAACTGAAGCTTCAACGCCTTTTTTTCCAATCTTCTTTAGCACCGGGCTAGGGAGTAAGCCCGTGGAACCTTAGTTTTGTTCCCTCGGGACTTACTTGTGGTTCCTGTGGTGCACTCCTGACCCTGCTGCTTTGAAAGAA	354
	3	>4-3	AAAGAAATGAGGCGAAGAAGTCCTTCAGGGATCCCCGGGGAAACCTGGAGGAAGTCCGACGAGATCGCGGCTGGGGCTTAGGACCCCACTCCTGCGAGACAGGAGTAATCCTAAACAGGGTTTTCACCCTTCCTTTAGTTTCCTTCCTCTCCTGGAGAGGTCTTCTGCCCTAGCCCGGTCTTCGAAGCTTCCTTTGGCTACTACCCGGTGGAAACAACTGAAGCTTCAACGCCTTTTTTTCCAATCTTCTTTAGCACCGGGCTAGGGAGTAAGCCCGTGGAACCTTAGTTTTGTTCCCTCGGGACTTACTTGTGGTTCCTGTGGTGCACTCCTGACCCTGCTGCTTTGAAAGAA	354
	4	>4-4	AAAGAAATGAGGCGAAGAAGTCCTTCGGGGATCCCCGGGGAAACCTGGAGGAAGTCCGACGAGATCGCGGCTGGGGCTTAGGACCCCACTCCTGCGAGACAGGAGTAATCCTAAACAGGGTTTTCACCCTTCCTTTAGTTTCCTTCCTCTCCTGGAGAGGTCTTCTGCCCTAGCCCGGTCTTCGAAGCTTCCTTTGGCTACTACCCGGTGGAAACAACTGAAGCTTCAACGCCTTTTTTTCCAATCTTCTTTAGCACCGGGCTAGGGAGTAAGCCCGTGGAACCTTAGTTTTGTTCCCTCGGGACTTACTTGTGGTTCCTGTGGTGCACTCCTGACCCTGCTGCTTTGAAAGAA	354
	5	>4-6	AAAGAAATGAGGCGAAGAAGTCCTTCAGGGATCCCCGGGGAAACCTGGAGGAAGTCCGACGAGATCGCGGCTGGGGCTTAGGACCCCACTCCTGCGAGACAGGAGTAATCCTAAACAGGGTTTTCACCCTTCCTTTAGTTTCCTTCCTCTCCTGGAGAGGTCTTCTGCCCTAGCCCGGTCTTCGAAGCTTCCTTTGGCTACTACCCGGTGGAAACAACTGAAGCTTCAACGCCTTTTTTTCCGATCTTCTTTAGCACCGGGCTAGGGAGTAAGCCCGTGGAACCTTAGTTTTGTTCCCTCGGGACTTACTTGTGGTTCCTGTGGTGCACTCCTGACCCTGCTGCTTTGAAAGAA	354
	6	>4-7	AAAGAAATGAGGCGAAGAAGTCCTTCAGGGATCCCCGGGGAAACCTGGAGGAAGTCCGACGAGATCGCGGCTGGGGCTTAGGACCCCACTCCTGCGAGACAGGAGTAATCCTAAACAGGGTTTTCACCCTTCCTTTAGTTTCCTTCCTCTCCTGGAGAGGTCTTCTGCCCTAGCCCGGTCTTCGAAGCTTCCTTTGGCTACTACCCGGTGGAAACAACTGAAGCTTCAACGCCTTTTTTTCCAATCTTCTTTAGCACCGGGCTAGGGAGTAAGCCCGTGGAACCTTAGTTTTGTTCCCTCGGGACTTACTTGTGGTTCCTGTGGTGCACTCCTGACCCTGCTGCTTTGAAAGAA	354
	7	>4-8	AAAGAAATGAGGCGAAGAAGTCCTTCAGGGATCCCCGGGGAAACCTGGAGGAAGTCCGACGAGATCGCGGCTGGGGCTTAGGACCCCACTCCTGCGAGACAGGAGTAATCCTAAACAGGGTTTTCACCCTTCCTTTAGTTTCCTTCCTCTCCTGGAGAGGTCTTCTGCCCTAGCCCGGTCTTCGAAGCTTCCTTTGGCTACTACCCGGTGGAAACAACCGAAGCTTCAGCGCCTTTTTTTCCAATCTTCTTTAGCACCGGGCTAGGGAGTAAGCCCGTGGAACCTTAGTTTTGTTCCCTCGGGACTTACTTGTGGTTCCTGTGGTGCACTCCTGACCCTGCTGCTTTGAAAGAA	354
	8	>4-10	AAAGAAATGAGGCGAAGAAGTCCTTCAGGGATCCCCGGGGAAACCTGGAGGAAGTCCGACGAGATCGCGGCTGGGGCTTAGGACCCCACTCCTGCGAGACAGGAGTAATCCTAAACAGGGTTTTCACCCTTCCTTTAGTTTCCTTCCTCTCCTGGAGAGGTCTTCTGCCCTAGCCCGGTCTTCGAAGCTTCCTTTGGCTACTACCCGGTGGAAACAACTGAGGCTTCAACGCCTTTTTTTCCAATCTTCTTTAGCACCGGGCTAGGGAGTAAGCCCGTGGAACCTTAGTTTTGTTCCCTCGGGACTTACTTGTGGTTCCTGTGGTGCACTCCTGACCCTGCTGCTTTGAAAGAA	354
	9	>4-11	AAAGAAATGAGGCGAAGAAGTCCTTCAGGGATCCCCGGGGAAACCTGGAGGAAGTCCGACGAGATCGCGGCTGGGGCTTAGGACCCCACTCCTGCGAGACAGGAGTAATCCTAAACAGGGTTTTCACCCTTCCTTTAGTTTCCTTCCTCTCCTGGAGAGGTCTTCTGCCCTAGCCCGGTCTTCGAAGCTTCCTTTGGCTACTACCCGGTGGAAACAACTGAAGCTTCAACGCCTTTTTTTCCAATCTTCTTTAGCACCGGGCTAGGGAGTAAGCCCGTGGAACCTTAGTTTTGTTCCCTCGGGACTTACTTGTGGTTCCTGTGGTGCACTCCTGACCCTGCTGCTTTGAAAGAA	354
	10	>4-12	AAAGAAATGAGGCGAAGAAGTCCTTCAGGGATCCCCGGGGAAACCTGGAGGAAGTCCGACGAGATCGCGGCTGGGGCTTAGGACCCCACTCCTGCGAGACAGGAGTAATCCTAAACAGGGTTTTCACCCTTCCTTTAGTTTCCTTCCTCTCCTGGAGAGGTCTTCTGCCCTAGCCCGGTCTTCGAAGCTTCCTTTGGCTACTACCCGGTGGAAACAACTGAAGCTTCAACGCCTTTTTTTCCAATCTTCTTTAGCACCGGGCTAGGGAGTAAGCCCGTGGAACCTTAGTTTTGTTCCCTCGGGACTTACTTGTGGTTCCTGTGGTGCACTCCTGACCCTGCTGCTTTGAAAGAA	354
	11	>4-14	AAAGAAATGAGGCGAAGAAGTCCTTCAGGGATCCCCGGGGAAACCTGGAGGAAGTCCGACGAGATCGCGGCTGGGGCTTAGGACCCCACTCCTGCGAGACAGGAGTAATCCTAAACAGGGTTTTCACCCTTCCTTTAGTTTCCTTCCTCTCCTGGAGAGGTCTTCTGCCCTAGCCCGGTCTTCGAAGCTTCCTTTGGCTACTACCCGGTGGAAACAACTGAAGCTTCAACGCCTTTTTTTCCAATCTTCTTTAGCACCGGGCTAGGGAGTAAGCCCGTGGAACCTTAGTTTTGTTCCCTCGGGACTTACTTGTGGTTCCTGTGGTGCACTCCTGACCCTGCTGCTTTGAAAGAA	354
	12	>4-15	AAAGAAATGAGGCGAAGAAGTCCTTCAGGGATCCCCGGGGAAACCTGGAGGAAGTCCGACGAGATCGCGGCTGGGGCTTAGGACCCCACTCCTGCGAGACAGGAGTAATCCTAAACAGGGTTTTCACCCTTCCTTTAGTTTCCTTCCTCTCCTGGAGAGGTCTTCTGCCCTAGCCCGGTCTTCGAAGCTTCCTTTGGCTACTACCCGGTGGAAACAACTGAAGCTTCAACGCCTTTTTTTCCAATCTTCTTTAGCACCGGGCTAGGGAGTAAGCCCGTGGAACCTTAGTTTTGTTCCCTCGGGACTTACTTGTGGTTCCTGTGGTGCACTCCTGACCCTGCTGCTTTGAAAGAA	354
	13	>4-16	AAAGAAATGAGGCGAAGAAGTCCTTCAGGGATCCCCGGGGAAACCTGGAGGAAGTCCGACGAGATCGCGGCTGGGGCTTAGGACCCCACTCCTGCGAGACAGGAGTAATCCTAAACAGGGTTTTCACCCTTCCTTTAGTTTCCTTCCTCTCCTGGAGAGGTCTTCTGCCCTAGCCCGGTCTTCGAAGCTTCCTTTGGCTACTACCCGGTGGAAACAACTGAAGCTTCAACGCCTTTTTTTCCAATCTTCTTTAGCACCGGGCTAGGGAGTAAGCCCGTGGAACCTTAGTTTTGTTCCCTCGGGACTTACTTGTGGTTCCTGTGGTGCACTCCTGACCCTGCTGCTTTGAAAGAA	354
	14	>4-17	AAAGAAATGAGGCGAAGAAGTCCTTCAGGGATCCCCGGGGAAACCTGGAGGAAGTCCGACGAGATCGCGGCTGGGGCTTAGGACCCCACTCCTGCGAGACAGGAGTAATCCTAAACAGGGTTTTCACCCTTCCTTTAGTTTCCTTCCTCTCCTGGAGAGGTCTTCTGCCCTAGCCCGGTCTTCGAAGCTTCCTTTGGCTACTACCCGGTGGAAACAACTGAAGCTTCAACGCCTTTTTTTCCAATCTTCTTTAGCACCGGGCTAGGGAGTAAGCCCGTGGAACCTTAGTTTTGTTCCCTCGGGACTTACTTGTGGTTCCTGTGGTGCACTCCTGACCCTGCTGCTTTGAAAGAA	354
	15	>4-18	AAAGAAATGAGGCGAAGAAGTCCTTCAGGGATCCCCGGGGAAACCTGGAGGAAGTCCGACGAGATCGCGGCTGGGGCTTAGGACCCCACTCCTGCGAGACAGGAGTAATCCTAAACAGGGTTTTCACCCTTCCTTTAGTTTCCTTCCTCTCCTGGAGAGGTCTTCTGCCCTAGCCCGGTCTTCGAAGCTTCCTCTGGCTACTACCCGGTGGAAACAACTGAAGCTTCAACGCCTTTTTTTCCAATCTTCTTTAGCACCGGGCTAGGGAGTAAGCCCGTGGAACCTTAGTTTTGTTCCCTCGGGACTTACTTGTGGTTCCTGTGGTGCACTCCTGACCCTGCTGCTTTGAAAGAA	354
	16	>4-19	AAAGAAATGAGGCGAAGAAGTCCTTCAGGGATCCCCGGGGAAACCTGGAGGAAGTCCGACGAGATCGCGGCTGGGGCTTAGGACCCCACTCCTGCGAGACAGGAGTAATCCTAAACAGGGTTTTCACCCTTCCTTTAGTTTCCTTCCTCTCCTGGAGAGGTCTTCTGCCCTAGCCCGGTCTTCGAAGCTTCCTTTGGCTACTACCCGGTGGAAACAACTGAAGCTTCAACGCCTTTTTTTCCAATCTTCTTTAGCACCGGGCTAGGGAGTAAGCCCGTGGAACCTTAGTTTTGTTCCCTCGGGACTTACTTGTGGTTCCTGTGGTGCACTCCTGACCCTGCTGCTTTGAAAGAA	354
	17	>4-20	AAAGAAATGAGGCGAAGAAGTCCTTCAGGGATCCCCGGGGAAACCTGGAGGAAGTCCGACGAGATCGCGGCTGGGGCTTAGGACCCCACTCCTGCGAGACAGGAGTAATCCTAAACAGGGTTTTCACCCTTCCTTTAGTTTCCTTCCTCTCCTGGAGAGGTCTTCTGCCCTAGCCCGGTCTTCGAAGCTTCCTTTGGCTACTACCCGGTGGAAACAACTGAAGCTTCAACGCCTTTTTTTCCAATCTTCTTTAGCACCGGGCTAGGGAGTAAGCCCGTGGAACCTTAGTTTTGTTCCCTCGGGACTTACTTGTGGTTCCTGTGGTGCACTCCTGACCCTGCTGCTTTGAAAGAA	354
	18	>4-21	AAAGAAATGAGGCGAAGAAGTCCTTCAGGGATCCCCGGGGAAACCTGGAGGAAGTCCGACGAGATCGCGGCTGGGGCTTAGGACCCCACTCCTGCGAGACAGGAGTAATCCTAAACAGGGTTTTCACCCTTCCTTTAGTTTCCTTCCTCTCCTGGAGAGGTCTTCTGCCCTAGCCCGGTCTTCGAAGCTTCCTTTGGCTACTACCCGGTGGAAACAACTGAAGCTTCAACGCCTTTTTTTCCAATCTTCTTTAGCACCGGGCTAGGGAGTAAGCCCGTGGAACCTTAGTTTTGTTCCCTCGGGACTTACTTGTGGTTCCTGTGGTGCACTCCTGACCCTGCTGCTTTGAAAGAA	354
	19	>4-23	AAaGAAaTGAGGCGAAGAAGTCCTTCAGGGATCCCCGGGGAAACCTGGAGGAAGTCCGACGAGATCGCGGCTGGGGCTTAGGACCCCACTCCTGCGAGACAGGAGTAATCCTAAACAGGGTTTTCACCCTTCCTTTAGTTTCCTTCCTCTCCTGGAGAGGTCTTCTGCCCTAGCCCGGTCTTCGAAGCTTCCTTTGGCTACTACCCGGTGGAAACAACTGAAGCTTCAACGCCTTTTTTTCCAATCTTCTTTAGCACCGGGCTAGGGAGTAAGCCCGTGGAACCTTAGTTTTGTTCCCTCGGGACTTACTTGTGGTTCCTGTGGTGCACTCCTGACCCTGCTGCTTTGAAAGAA	354
	20	>4-24	AAAGAAATGAGGCGAAGAAGTCCTTCAGGGATCCCCGGGGAAACCTGGAGGAAGTCCGACGAGATCGCGGCTGGGGCTTAGGACCCCACTCCTGCGAGACAGGAGTAATCCTAAACAGGGTTTTCACCCTTCCTTTAGTTTCCTTCCTCTCCTGGAGAGGTCTTCTGCCCTAGCCCGGTCTTCGAAGCTTCCTTTGGCTACTACCCGGTGGAAACAACTGAAGCTTCAACGCCTTTTTTTCCAATCTTCTTTAGCACCGGGCTAGGGAGTAAGCCCGTGGAACCTTAGTTTTGTTCCCTCGGGACTTACTTGTGGTTCCTGTGGTGCACTCCTGACCCTGCTGCTTTGAAAGAA	354
	21	>4-25	AAAGAAATGAGGCGAAGAAGTCCTTCAGGGATCCCCGGGGAAACCTGGAGGAAGTCCGACGAGATCGCGGCTGGGGCTTAGGACCCCACTCCTGCGAGACAGGAGTAATCCTAAACAGGGTTTTCACCCTTCCTTTAGTTTCCTTCCTCTCCTGGAGAGGTCTTCTGCCCTAGCCCGGTCTTCGAAGCTTCCTTTGGCTACTACCCGGTGGAAACAACTGAAGCTTCAACGCCTTTTTTTCCAATCTTCTTTAGCACCGGGCTAGGGAGTAAGCCCGTGGAACCTTAGTTTTGTTCCCTCGGGACTTACTTGTGGTTCCTGTGGTGCACTCCTGACCCTGCTGCTTTGAAAGAA	354
	22	>4-26	AAAGAAATGAGGCGAAGAAGTCCTTCAGGGATCCCCGGGGAAACCTGGAGGAAGTCCGACGAGATCGCGGCTGGGGCTTAGGACCCCACTCCTGCGAGACAGGAGTAACCCTAAACAGGGTTTTCACCCTTCCTTTAGTTTCCTTCCTCTCCTGGAGAGGTCTTCTGCCCTAGCCCGGTCTTCGAAGCTTCCTTTGGCTACTACCCGGTGGAAACAACTGAAGCTTCAACGCCTTTTTTTCCAATCTTCTTTAGCACCGGGCTAGGGAGTAAGCCCGTGGAACCTTAGTTTTGTTCCCTCGGGACTTACTTGTGGTTCCTGTGGTGCACTCCTGACCCTGCTGCTTTGAAAGAA	354
	23	>4-27	AAAGAAATGAGGCGAAGAAGTCCTTCAGGGATCCCCGGGGAAACCTGGAGGAAGTCCGACGAGATCGCGGCTGGGGCTTAGGACCCCACTCCTGCGAGACAGGAGTAATCCTAAACAGGGTTTTCACCCTTCCTTTAGTTTCCTTCCTCTCCTGGAGAGGTCTTCTGCCCTAGCCCGGTCTTCGAAGCTTCCTTTGGCTACTACCCGGTGGAAACAACTGAAGCTTCAACGCCTTTTTTTCCAATCTTCTTTAGCACCGGGCTAGGGAGTAAGCCCGTGGAACCTTAGTTTTGTTCCCTCGGGACTTACTTGTGGTTCCTGTGGTGCACTCCTGACCCTGCTGCTTTGAAAGAA	354
	24	>4-28	AAAGAAATGAGGCGAAGAAGTCCTTCAGGGATCCCCGGGGAAACCTGGAGGAAGTCCGACGAGATCGCGGCTGGGGCTTAGGACCCCACTCCTGCGAGACAGGAGTAATCCTAAACAGGGTTTTCACCCTTCCTTTAGTTTCCTTCCTCTCCTGGAGAGGTCTTCTGCCCTAGCCCGGTCTTCGAAGCTTCCTTTGGCTACTACCCGGTGGAAACAACTGAAGCTTCAACGCCTTTTTTTCCAATCTTCTTTAGCACCGGGCTAGGGAGTAAGCCCGTGGAACCTTAGTTTTGTTCCCTCGGGACTTACTTGTGGTTCCTGTGGTGCACTCCTGACCCTGCTGCTTTGAAAGAA	354
6. Diskclub	1	>6-2	AAAGAAATGAGGCGAAGAAGTCCTTCAGGGATCCCCGGGGAAACCTGGAGGAAGTCCGACGAGATCGCGGCTGGGGCTTAGGACCCCACTCCTGCGAGACGGGAGTAATCCTAAACAGGGTTTTCACCCTTCCTTTAGTTTCCTTCCTCTCCTGGAGAGGTCTTCTGCCCTAGCCCGGTCTTCGAAGCTTCCTTTGGCTATTACCCGGTGGAAACAACTGAAGCTTCAACGCCTTTTTTTCCTATCTTCTTTAGCACCGGGCTAGGGAGTAAGCCCGTGGAACCTTAGTTTTGTTCCCTCGGGACTTACTTGTGGTTCCTGTGGTGCACTCCTGACCCTGCTGCTTTGAAAGAA	354
	2	>6-4	AAAGAAATGAGGCGAAGAAGTCCTTCAGGGATCCCCGGGGAAACCTGGAGGAAGTCCGACGAGATCGCGGCTGGGGCTTAGGACCCCACTCCTGCGAGACAGGAGTAATCCTAAACAGGGTTTTCACCCTTCCTTTAGTTTCCTTCCCCTCCTGGAGAGGTCTTCTGCCCTAGCCCGGTCTTCGAAGCTTCCTTTGGCTACTACCCGGTGGAAACAACTGAAGCTTCAACGCCTTTTTTTCCAATCTTCTTTAGCACCGGGCTAGGGAGTAAGCCCGTGGAACCTTAGTTTTGTTCCCTCGGGACTTACTTGTGGTTCCTGTGGTGCACTCCTGACCCTGCTGCTTTGAAAGAA	354
	3	>6-9	AAAGAAATGAGGCGAAGAAGTCCTTCAGGGATCCCCGGGGAAACCTGGAGGAAGTCCGACGAGATCGCGGCTGGGGCTTAGGACCCCACTCCTGCGAGACAGGAGTAATCCTAAACAGGGTTTTCACCCTTCCTTTAGTTTCCTTCCTCTCCTGGAGAGGTCTTCTGCCCTAGCCCGGTCTTCGAAGCTTCCTTTGGCTACTACCCGGTGGAAACAACTGAAGCTTCAACGCCTTTTTTTCCTATCTTCTTTAGCACCGGGCTAGGGAGTAAGCCCGTGGAACCTTAGTTTTGTTCCCTCGGGACTTACTTGTGGTTCCTGTGGTGCACTCCTGACCCTGCTGCTTTGAAAGAA	354
	4	>6-10	AAAGAAATGAGGCGAAGAAGTCCTTCAGGGATCCCCGGGGAAACCTGGAGGAAGTCCGACGAGATCGCGGCTGGGGCTTAGGACCCCACTCCTGCGAGACAGGAGTAATCCTAAACAGGGTTTTCGCCCTTCCTTTAGTTTCCTTCCTCTCCTGGAGAGGTCTTCTGCCCTAGCCCGGTCTTCGAAGCTTCCTTTGGCTACTACCCGGTGGAAACAACTGAAGCTTCAACGCCTTTTTTTCCTATCTTCTTTAGCACCGGGCTAGGGAGTAAGCCCGTGGAACCTTAGTTTTGTTCCCTCGGGACTTACTTGTGGTTCCTGTGGTGCACTCCTGACCCTGCTGCTTTGAAAGAA	354
	5	>6-12	AAAGAAATGAGGCGAAGAAGTCCTTCAGGGATCCCCGGGGAAACCTGGAGGAAGTCCGACGAGATCGCGGCTGGGGCTTAGGACCCCACTCCTGCGAGACAGGAGTAATCCTAAACAGGGTTTTCACCCTTCCTTTAGTTTCCTTCCTCTCCTGGAGAGGTCTTCTGCCCTAGCCCGGTCTTCGAAGCTTCCTTTGGCTACTACCCGGTGGAAACAACTGAAGCTTCAACGCCTTTTTTTCCAATCTTCTTTAGCACCGGGCTAGGGAGTAAGCCCGTGGAACCTTAGTTTTGTTCCCTCGGGACTTACTTGTGGTTCCTGTGGTGCACTCCTGACCCTGCTGCTTTGAAAGAA	354
	6	>6-14	AAAGAAATGAGGCGAAGAAGTCCTTCAGGGATCCCCGGGGAAACCTGGAGGAAGTCCGACGAGATCGCGGCTGGGGCTTAGGACCCCACTCCTGCGAGACAGGAGTAATCCTAAACAGGGTTTTCACCCTTCCTTTAGTTTCCTTCCTCTCCTGGAGAGGTCTTCTGCCCTAGCCCGGTCTTCGAAGCTTCCTTTGGCTACTACCCGGTGGAAACAACTGAAGCTTCAACGCCTTTTTTTCCAATCTTCTTTAGCACCGGGCTAGGGAGTAAGCCCGTGGAACCTTAGTTTTGTTCCCTCGGGACTTACTTGTGGTTCCTGTGGTGCACTCCTGACCCTGCTGCTTTGAAAGAA	354
	7	>6-15	AAAGAAATGAGGCGAAGAAGTCCTTCAGGGATCCCCGGGGAAACCTGGAGGAAGTCCGACGAGATCGCGGCTGGGGCTTAGGACCCCACTCCTGCGAGACAGGAGTAATCCTAAACAGGGTTTTCACCCTTCTTTTAGTTTCCTTCCTCTCCTGGAGAGGTCTTCTGCCCTAGCCCGGTCTTCGAAGCTTCCTTTGGCTACTACCCGGTGGAAACAACTGAAGCTTCAACGCCTTTTTTTCCTATCTTCTTTAGCACCGGGCTAGGGAGTAAGCCCGTGGAACCTTAGTTTTGTTCCCTCGGGACTTACTTGTGGTTCCTGTGGTGCACTCCTGACCCTGCTGCTTTGAAAGAA	354
	8	>6-16	AAAGAAATGAGGCGAAGAAGTCCTTCAGGGATCCCCGGGGAAACCTGGAGGAAGTCCGACGAGATCGCGGCTGGGGCTTAGGACCCCACTCCTGCGAGACAGGAGTAATCCTAAACAGGGTTTTCACCCTTCCTTTAGTTTCCTTCCTCTCCTGGAGAGGTCTTCTGCCCTAGCCCGGTCTTCGAAGCTTCCTTTGGCTACTACCCGGTGGAAACAACTGGAGCTTCAACGCCTTTTTTTCCAATCTTCTTTAGCACCGGGCTAGGGAGTAAGCCCGTGGAACCTTAGTTTTGTTCCCTCGGGACTTACTTGTGGTTCCTGTGGTGCACTCCTGACCCTGCTGCTTTGAAAGAA	354
	9	>6-18	AAAGAAATGAGGCGAAGAAGTCCTTCAGGGATCCCCGGGGAAACCTGGAGGAAGTCCGACGAGATCGCGGCTGGGGCTTAGGACCCCACTCCTGCGAGACGGGAGTAATCCTAAACAGGGTTTTCACCCTTCCTTTAGTTTCCTTCCTCTCCTGGAGAGGTCTTCTGCCCTAGCCCGGTCTTCGAAGCTTCCTTTGGCTATTACCCGGTGGAAACAACTGAAGCTTCAACGCCTTTTTTTCCTATCTTCTTTAGCACCGGGCTAGGGGGTAAGCCCGTGGAACCTTAGTTTTGTTCCCTCGGGACTTACTTGTGGTTCCTGTGGTGCACTCCTGACCCTGCTGCTTTGAAAGAA	354
	10	>6-19	AAAGAAATGAGGCGAAGAAGTCCTTCAGGGATCCCCGGGGAAACCTGGAGGAAGTCCGACGAGATCGCGGCTGGGGCTTAGGACCCCACTCCTGCGAGACAGGAGTAATCCTAAACAGGGTTTTCACCCTTCCTTTAGTTTCCTTCCTCTCCTGGAGAGGTCTTCTGCCCTAGCCCGGTCTTCGAAGCTCCCTTTGGCTACTACCCGGTGGAAACAACTGAAGCTTCAACGCCTTTTTTTCCTATCTTCTTTAGCACCGGGCTAGGGAGTAAGCCCGTGGAACCTTAGTTTTGTTCCCTCGGGACTTACTTGTGGTTCCTGTGGTGCACTCCTGACCCTGCTGCTTTGAAAGAA	354
	11	>6-22	AAAGAAATGAGGCGAAGAAGTCCTTCAGGGATCCCCGGGGAAACCTGGAGGAAGTCCGACGAGATCGCGGCTGGGGCTTAGGACCCCACTCCTGCGAGACAGGAGTAATCCTAAACAGGGCTTTCACCCTTCCTTTAGTTTCCTTCCTCTCCTGGAGAGGTCTTCTGCCCTAGCCCGGTCTTCGAAGCTTCCTTTGGCTACTACCCGGTGGAAACAACTGAAGCTTCAACGCCCTTTTTTCCAATCTTCTTTAGCACCGGGCTAGGGAGTAAGCCCGTGGAACCTTAGTTTTGTTCCCTCGGGACTTACTTGTGGTTCCTGTGGTGCACTCCTGACCCTGCTGCTTTGAAAGAA	354
	12	>6-24	AAAGAAATGAGGCGAAGAAGTCCTTCAGGGATCCCCGGGGAAACCTGGAGGAAGTCCGACGAGATCGCGGCTGGGGCTTAGGACCCCACTCCCGCGAGACAGGAGTAATCCTAAACAGGGTTTTCACCCTTCCTTTAGTTTCCTTCCTCTCCTGGAGAGGTCTTCTGCCCTAGCCCGGTCTTCGAAGCTTCCTTTGGCTACTACCCGGTGGAAACAACTGAAGCTTCAACGCCTTTTTTTCCTATCTTCTTTAGCACCGGGCTAGGGAGTAAGCCCGTGGAACCTTAGTTTTGTTCCCTCGGGACTTACTTGTGGTTCCTGTGGTGCACTCCTGACCCTGCTGCTTTGAAAGAA	354
	13	>6-25	AAAGAAATGAGGCGAAGAAGTCCTTCAGGGATCCCCGGGGAAACCTGGAGGAAGTCCGACGAGATCGCGGCTGGGGCTTAGGACCCCACTCCTGCGAGACAGGAGTAATCCTAAACAGGGTTTTCACCCTTCCTTTAGTTTCCTTCCTCTCCTGGAGAGGTCTTCTGCCCTAGCCCGGTCTTCGAAGCTTCCTTTGGCTACTACCCGGTGGGAACAACTGAAGCTTCAACGCCTTTTTTTCCAATCTTCTTTAGCACCGGGCTAGGGAGTAAGCCCGTGGAACCTTAGTTTTGTTCCCTCGGGACTTACTTGTGGTTCCTGTGGTGCACTCCTGACCCTGCTGCTTTGAAAGAA	354
	14	>6-26	AAAGAAATGAGGCGAAGAAGTCCTTCAGGGATCCCCAGGGAAACCTGGAGGAAGTCCGACGAGATCGCGGCTGGGGCTTAGGACCCCACTCCTGCGAGACAGGAGTAATCCTAAACAGGGTTTTCACCCTTCCTTTAGTTTCCTTCCTCTCCTGGAGAGGTCTTCTGCCCTAGCCCGGTCTTCGAAGCTTCCTTTGGCTACTACCCGGTGGAAACAACTGAAGCTTCAACGCCTTTTTTTCCAATCTTCTTTAGCACCGGGCTAGGGAGTAAGCCCGTGGAACCTTAGTTTTGTTCCCTCGGGACTTACTTGTGGTTCCTGTGGTGCACTCCTGACCCTGCTGCTTTGAAAGAA	354
	15	>6-28	AAAGAAATGAGGCGAAGAAGTCCTTCAGGGATCCCCGGGGAAACCTGGAGGAAGTCCGACGAGATCGCGGCTGGGGCTTAGGACCCCACTCCTGCGAGACAGGGGTAATCCTAAACAGGGCTTTCACCCTTCCTTTAGTTTCCTTCCTCTCCTGGAGAGGTCTTCTGCCCTAGCCCGGTCTTCGAAGCTTCCTTTGGCTACTACCCGGTGGAAACAACTGAAGCTTCAACGCCTTTTTTTCCAATCTTCTTTAGCACCGGGCTAGGGAGTAAGCCCGTGGAACCTTAGTTTTGTTCCCTCGGGACTTACTTGTGGTTCCTGTGGTGCACTCCTGACCCTGCTGCTTTGAAAgAa	354
	16	>6-31	AAAGAAATGAGGCGAAGAAGTCCTTCAGGGATCCCCGGGGAAACCTGGAGGAAGTCCGACGAGATCGCGGCTGGGGCTTAGGGCCCCACTCCTGCGAGACAGGGGTAATCCTAAACAGGGTTTTCACCCTTCCTTTAGTTTCCTTCCTCTCCTGGAGAGGTCTTCTGCCCTAGCCCGGCCTTCGAAGCTTCCTTTGGCTACTACCCGGTGGAAACAACTGAAGCTTCAACGCCTTTTTTTCCAATCTTCTTTAGCACCGGGCTAGGGAGTAAGCCCGTGGAACCTTAGTTTTGTTCCCTCGGGACTTACTTGTGGTTCCTGTGGTGCACTCCTGACCCTGCTGCTTTGAAAGAA	354
	17	>6-33	AAAGAAATGAGGCGAAGAAGTCCTTCAGGGATCCCCGGGGAAACCTGGAGGAAGTCCGACGAGATCGCGGCTGGGGCTTAGGACCCCACTCCTGCGAGACAGGAGTAATCCTAAACAGGGTTTTCACCCTTCCTTTAGTTTCCTTCCTCTCCTGGAGAGGTCTTCTGCCCTAGCCCGGTCTTCGAAGCTTCCTTTGGCTACTACCCGGTGGAAACAACTGAAGCTTCAACGCCTTTTTTTCCAATCTTCTTTAGCACCGGGCTAGGGAGTAAGCCCGTGGAACCTTAGTTTTGTTCCCTCGGGACTTACTTGTGGTTCCTGTGGTGCACTCCTGACCCTGCTGCTTTGAAAGAA	354
	18	>6-34	AAAGAAATGAGGCGAAGAAGTCCTTCAGGGATCCCCGGGGAAACCTGGAGGAAGTCCGACGAGATCGCGGCTGGGGCTTAGGACCCCACTCCTGCGAGACAGGAGTAATCCTAAACAGGGTTTTCACCCTTCCTTTAGTTTCCTTCCTCTCCTGGAGAGGTCTTCCGCCCTAGCCCGGTCTTCGAAGCTTCCTTTGGCTACTACCCGGTGGAAACAACTGAAGCTTCAACGCCTTTTTTTCCTATCTTCTTTAGCACCGGGCTAGGGAGTAAGCCCGTGGAACCTTAGTTTTGTTCCCTCGGGACTTACTTGTGGTTCCTGTGGTGCACTCCTGACCCTGCTGCTTTGAAAGAA	354
	19	>6-36	AAAGAAATGAGGCGAAGAAGTCCTTCAGGGATCCCCGGGGAAACCTGGAGGAAGTCCGACGAGATCGCGGCTGGGGCTTAGGACCCCACTCCTGCGAGACAGGAGTAATCCTAAACAGGGTTTTCACCCTTCCTTTAGTTTCCTTCCTCTCCTGGAGAGGTCTTCTGCCCTAGCCCGGTCTTCGAAGCTTCCTTTGGCTACTACCCGGTGGAAACAACTGAAGCTTCAACGCCTTTTTTTCCAATCTTCTTTAGCACCGGGCTAGGGAGTAAGCCCGTGGAACCTTAGTTTTGTTCCCTCGGGACTTACTTGTGGTTCCTGTGGTGCACTCCTGACCCTGCTGCTTTGAAAGAA	354
	20	>6-37	AAAGAAATGAGGCGAAGAAGTCCTTCAGGGATCCCCGGGGAAACCTGGAGGAAGTCCGACGAGATCGCGGCTGGGGCTTAGGACCCCACTCCTGCGAGACAGGAGTAATCCTAAACAGGGTTTTCACCCTTCCTTTAGTTTCCTTCCTCTCCTGGAGAGGTCTTCTGCCCTAGCCCGGTCTTCGAAGCTTCCTTTGGCTACTACCCGGTGGAAACAACTGAAGCTTCAACGCCTTTTTTTCCAATCTTCTCTAGCACCGGGCTAGGGAGTAAGCCCGTGGAACCTTAGTTTTGTTCCCTCGGGACTTACTTGTGGTTCCTGTGGTGCACTCCTGACCCTGCTGCTTTGAAAGAA	354
	21	>6-38	AAAGAAATGAGGCGAAGAAGTCCTTCAGGGATCCCCGGGGAAACCTGGAGGAAGTCCGACGAGATCGCGGCTGGGGCTTAGGACCCCACTCCTGCGAGACAGGGGTAATCCTAAACAGGGTTTTCACCCTTCCTTTAGTTTCCTTCCTCTCCTGGAGAGGTCTTCTGCCCTAGCCCGGTCTTCGAAGCTTCCTTTGGCTACTACCCGGTGGAAACAACTGAAGCTTCAACGCCTTTTTTTCCAATCTTCTTTAGCACCGGGCTAGGGAGTAAGCCCGTGGAACCTTAGTTTTGTTCCCTCGGGACTTACTTGTGGTTCCTGTGGTGTACTCCTGACCCTGCTGCTTTGAAAGAA	354
	22	>6-39	AAAGAAATGAGGCGAAGAAGTCCTTCAGGGATCCCCGGGGAAACCTGGAGGAAGTCCGACGAGATCGCGGCTGGGGCTTAGGACCCCACTCCCGCGAGACAGGAGTAATCCTAAACAGGGTTTTCACCCTTCCTTTAGTTTCCTTCCTCTCCTGGAGAGGTCTTCTGCCCTAGCCCGGTCTTCGAAGCTTCCTTTGGCTACTACCCGGTGGAAACAACTGAAGCTTCAACGCCTTTTTTTCCTATCTTCTTTAGCACCGGGCTAGGGAGTAAGCCCGTGGAACCTTAGTTTTGTTCCCTCGGGACTTACTTGTGGTTCCTGTGGTGCACTCCTGACCCTGCTGCTTTGAAAGAA	354
	23	>6-40	AAAGAAATGAGGCGAAGAAGTCCTTCAGGGATCCCCGGGGAAACCTGGAGGAAGTCCGACGAGATCGCGGCTGGGGCTTAGGACCCCACTCCTGCGAGACAGGAGTAATCCTAAACAGGGTTTTCACCCTTCCTTTAGTTTCCTTCCTCTCCTGGAGAGGTCTTCTGCCCTAGCCCGGTCTTCGAAGCTTCCTTTGGCTACTACCCGGTGGAAACAACTGAAGCTTCAACGCCTTTTTTTCCAATCTTCTTTAGCACCGGGCTAGGGAGTAAGCCCGTGGAACCTTAGTTTTGTTCCCTCGGGACTTACTTGTGGTTCCTGTGGTGCACTCCTGACCCTGCTGCTTTGAAAGAA	354
	24	>6-42	AAAGAAATGAGGCGAAGAAGTCCTTCAGGGATCCCCGGGGAAACCTGGAGGAAGTCCGACGAGATCGCGGCTGGGGCTTAGGACCCCACTCCTGCGAGACAGGGGTAATCCTAAACAGGGTTTTCACCCTTCCTTTAGTTTCCTTCCTCTCCTGGAGAGGTCTTCTGCCCTAGCCCGGTCTTCGAAGCTTCCTTTGGCTACTACCCGGTGGAAACAACTGAAGCTTCAACGCCTTTTTTTCCAATCTTCTTTAGCACCGGGCTAGGGAGTAAGCCCGTGGAACCTTAGTTTTGTTCCCTCGGGAGTTACTTGTGGTTCCTGTGGTGCACTCCTGACCCTGCTGCTTTGAAAGAA	354
	25	>6-44	AAAGAAATGAGGCGAAGAAGTCCTTCAGGGATCCCCGGGGAAACCTGGAGGAAGTCCGACGAGATCGCGGCTGGGGCTTAGGACCCCACTCCTGCGAGACAGGAGTAATCCTAAACAGGGCTTTCACCCTTCCTTTAGTTTCCTTCCTCTCCTGGAGAGGTCTTCTGCCCTAGCCCGGTCTTCGAAGCTTCCTTTGGCTACTACCCGGTGGAAACAACTGAAGCTTCAACGCCTTTTTTTCCAATCTTCTTTAGCACCGGGCTAGGGAGTAAGCCCGTGGAACCTTAGTTTTGTTCCCTCGGGACTTACTTGTGGTTCCTGTGGTGCACTCCTGACCCTGCTGCTTTGAAAGAA	354
7. Vatican	1	>7-1	AAAGAAATGAGGCGAAGAAGTCCTTCAGGGATCCCCGGGGAAACCTGGAGGAAGTCCGACGAGATCGCGGCTGGGGCTTAGGACCCCACTCCTGCGAGACAGGAGTAATCCTAAACAGGGTTTTCACCCTTCCTTTAGTTTCCTTCCTCTCCTGGAGAGGTCTTCTGCCCTAGCCCGGTCTTCGAAGCTTCCTTTGGCTACTACCCGGTGGAAACAACTGAAGCTTCAACGCCTTTTTTTCCTATCTTCTTTAGCACCGGGCTAGGGAGTAAGCCCGTGGAACCTTAGTTTTGTTCCCTCGGGACTTACTTGTGGTTCCTGTGGTGCACTCCTGACCCTGCTGCTTTGAAAGAA	354
	2	>7-2	AAAGAAATGAGGCGAAGAAGTCCTTCAGGGATCCCCGGGGAAACCTGGAGGAAGTCCGACGAGATCGCGGCTGGGGCTTAGGACCCCACTCCTGCGAGACAGGAGTAATCCTAAACAGGGTTTTCACCCTTCCTTTAGTTTCCTTCCTCTCCTGGAGAGGTCTTCTGCCCTAGCCCGGTCTTCGAAGCTTCCTTTGGCTACTACCCGGTGGAAACAACTGAAGCTTCAACGCCTTTTTTTCCTATCTTCTTTAGCACCGGGCTAGGGAGTAAGCCCGTGGAACCTTAGTTTTGTTCCCTCGGGACTTACTTGTGGTTCCTGTGGTGCACTCCTGACCCTGCTGCTTTGAAAGAA	354
	3	>7-3	AAAGAAATGAGGCGAAGAAGTCCTTCAGGGATCCCCGGGGAAACCTGGAGGAAGTCCGACGAGATCGCGGCTGGGGCTTAGGACCCCACTCCTGCGAGACAGGAGTAATCCTAAACAGGGTTTTCACCCTTCCTTTAGTTTCCTTCCTCTCCTGGAGAGGTCTTCTGCCCTAGCCCGGTCTTCGAAGCTTCCTTTGGCTACTACCCGGTGGAAACAACTGAAGCTTCAACGCCTTTTTTTCCTATCTTCTTTAGCACCGGGCTAGGGAGTAAGCCCGTGGAACCTTAGTTTTGTTCCCTCGGGACTTACTTGTGGTTCCTGTGGTGCACTCCTGACCCTGCTGCTTTGAAAGAA	354
	4	>7-5	AAAGAAATGAGGCGAAGAAGTCCTTCAGGGATCCCCGGGGAAACCTGGAGGAAGTCCGACGAGATCGCGGCTGGGGCTTAGGACCCCACTCCTGCGAGACAGGAGTAATCCTAAACAGGGTTTTCACCCTTCCTTTAGTTTCCTTCCTCTCCTGGAGAGGTCTTCTGCCCTAGCCCGGTCTTCGAAGCTTCCTTTGGCTACTACCCGGTGGAAACAACTGAAGCTTCAACGCCTTTTTTTCCTATCTTCTTAAGCACCGGGCTAGGGAGTAAGCCCGTGGAACCTTAGTTTTGTTCCCTCGGGACTTACTTGTGGTTCCTGTGGTGCACTCCTGACCCTGCTGCTTTGAAAGAA	354
	5	>7-6	AAAGAAATGAGGCGAAGAAGTCCCTCAGGGATCCCCGGGGAAACCTGGAGGAAGTCCGACGAGATCGCGGCTGGGGCTTAGGACCCCACCCCTGCGAGACAGGAGTAATCCTAAACAGGGTTTTCACCCTTCCTTTAGTTTCCTTCCTCTCCTGGAGAGGTCTTCTGCCCTAGCCCGGTCTTCGAAGCTTCCTTTGGCTACTACCCGGTGGAAACAACTGAAGCTTCAACGCCTTTTTTTCCAATCTTCTTTAGCACCGGGCTAGGGAGTAAGCCCGTGGAACCTTAGTTTTGTTCCCTCGGGACTTACTTGTGGTTCCTGTGGTGCACTCCTGACCCTGCTGCTTTGAAAGAA	354
	6	>7-7	AAAGAAATGAGGCGAAGAAGTCCTTCAGGGATCCCCGGGGAAACCTGGAGGAAGTCCGACGAGATCGCGGCTGGGGCTTAGGACCCCACTCCTGCGAGACAGGAGTAATCCTAAACAGGGTTTTCACCCTTCCTTTAGTTTCCTTCCTCTCCTGGAGAGGTCTTCTGCCCTAGCCCGGTCTTCGAAGCTTCCTTTGGCTACTACCCGGTGGAAACAACTGAAGCTTCAACGCCTTTTTTTCCTATCTTCTTTAGCACCGGGCTAGGGAGTAAGCCCGTGGAACCTTAGTTTTGTTCCCTCGGGACTTACTTGTGGTTCCTGTGGTGCACTCCTGACCCTGCTGCTTTGAAAGAA	354
	7	>7-8	AAAGAAATGAGGCGAAGAAGTCCTTCAGGGATCCCCGGGGAAACCTGGAGGAAGTCCGACGAGATCGCGGCTGGGGCTTAGGACCCCACTCCTGCGAGACAGGAGTAATCCTAAACAGGGTTTTCACCCTTCCTTTAGTTTCCTTCCTCTCCTGGAGAGGTCTTCTGCCCTAGCCCGGTCTTCGAAGCTTCCTTTGGCTACTACCCGGTGGAAACAACTGAAGCTTCAACGCCTTTTTTTCCTATCTTCTTTAGCACCGGGCTAGGGAGTAAGCCCGTGGAACCTTAGTTTTGTTCCCTCGGGACTTACTTGTGGTTCCTGTGGTGCACTCCTGACCCTGCTGCTTTGAAAGAA	354
	8	>7-9	AAAGAAATGAGGCGAAGAAGTCCTTCAGGGATCCCCGGGGAAACCTGGAGGAAGTCCGACGAGATCGCGGCTGGGGCTTAGGACCCCACTCCTGCGAGACAGGAGTAATCCTAAACAGGGTTTTCACCCTTCCTTTAGTTTCCTTCCTCTCCTGGAGAGGTCTTCTGCCCTAGCCCGGTCTTCGAAGCTTCCTTTGGCTACTACCCGGTGGAAACAACTGAAGCTTCAACGCCTTTTTTTCCTATCTTCTTTAGCACCGGGCTAGGGAGTAAGCCCGTGGAACCTTAGTTTTGTTCCCTCGGGACTTACTTGTGGTTCCTGTGGTGCACTCCTGACCCTGCTGCTTTGAAAGAA	354
	9	>7-10	AAAGAAATGAGGCGAAGAAGTCCTTCAGGGATCCCCGGGGAAACCTGGAGGAAGTCCGACGAGATCGCGGCTGGGGCTTAGGACCCCACTCCTGCGAGACAGGAGTAATCCTAAACAGGGTTTTCACCCTTCCTTTAGTTTCCTTCCTCTCCTGGAGAGGTCTTCTGCCCTAGCCCGGTCTTCGAAGCTTCCTTTGGCTACTACCCGGTGGAAACAACTGAAGCTTCAACGCCTTTTTTTCCTATCTTCTTTAGCACCGGGCTAGGGAGTAAGCCCGTGGAACCTTAGTTTTGTTCCCTCGGGACTTACTTGTGGTTCCTGTGGTGCACTCCTGACCCTGCTGCTTTGAAAGAA	354
	10	>7-11	AAAGAAATGAGGCGAAGAAGTCCTTCAGGGATCCCCGGGGAAACCTGGAGGAAGTCCGACGAGATCGCGGCTGGGGCTTAGGACCCCACTCCTGCGAGACAGGAGTAATCCTAAACAGGGTTTTCACCCTTCCTTTAGTTTCCTTCCTCTCCTGGAGAGGTCTTCTGCCCTAGCCCGGTCTTCGAAGCTTCCTTTGGCTACTACCCGGTGGAAACAACTGAAGCTTCAACGCCTTTTTTTCCTATCTTCTTTAGCACCGGGCTAGGGAGTAAGCCCGTGGAACCTTAGTTTTGTTCCCTCGGGACTTACTTGTGGTTCCTGTGGTGCACTCCTGACCCTGCTGCTTTGAAAGAA	354
	11	>7-12	AAAGAAATGAGGCGAAGAAGTCCTTCAGGGATCCCCGGGGAAACCTGGAGGAAGTCCGACGAGATCGCGGCTGGGGCTTAGGACCCCACTCCTGCGAGACAGGAGTAATCCTAAACAGGGTTTTCACCCTTCCTTTAGTTTCCTTCCTCTCCTGGAGAGGTCTTCTGCCCTAGCCCGGTCTTCGAAGCTTCCTTTGGCTACTACCCGGTGGAAACAACTGAAGCTTCAACGCCTTTTTTTCCAATCTTCTCTAGCACCGGGCTAGGGAGTAAGCCCGTGGAACCTTAGTTTTGTTCCCTCGGGACTTACTTGTGGTTCCTGTGGTGCACTCCTGACCCTGCTGCTTTGAAAGAA	354
	12	>7-13	AAAGAAATGAGGCGAAGAAGTCCTTCAGGGATCCCCGGGGAAACCTGGAGGAAGTCCGACGAGATCGCGGCTGGGGCTTAGGACCCCACTCCTGCGAGACAGGAGTAATCCTAAACAGGGCTTTCACCCTTCCTTTAGTTTCCTTCCTCTCCTGGAGAGGTCTTCTGCCCTAGCCCGGTCTTCGAAGCTTCCTTTGGCTACTACCCGGTGGAAACAACTGAAGCTTCAACGCCTTTTTTTCCAATCTTCTTTAGCACCGGGCTAGGGAGTAAGCCCGTGGAACCTTAGTTTCGTTCCCTCGGGACTTACTTGTGGTTCCTGTGGTGCACTCCTGACCCTGCTGCTTTGAAAGaa	354
	13	>7-14	AAAGAAATGAGGCGAAGAAGTCCTTCAGGGATCCCCGGGGAAACCTGGAGGAAGTCCGACGAGATCGCGGCTGGGGCTTAGGACCCCACTCCTGCGAGACAGGGGTAATCCTAAACAGGGTTTTCACCCTTCCTTTAGTTTCCTTCCTCTCCTGGAGAGGTCTTCTGCCCTAGCCCGGTCTTCGAAGCTTCCTTTGGCTACTACCCGGTGGAAACAACTGAAGCTTCAACGCCTTTTTTTCCTATCTTCTTTAGCACCGGGCTAGGGAGTAAGCCCGTGGAACCTTAGTTTTGTTCCCTCGGGACTTACTTGTGGTTCCTGTGGTGCACTCCTGACCCTGCTGCTTTGAAAGAA	354
	14	>7-16	AAAGAAATGAGGCGAAGAAGTCCTTCAGGGATCCCCGGGGAAACCTGGAGGAAGTCCGACGAGATCGCGGCTGGGGCTTAGGACCCCACTCCTGCGAGACAGGAGTAATCCTAAACAGGGTTTTCACCCTTCCTTTAGTTTCCTTCCTCTCCTGGAGAGGTCTTCTGCCCTAGCCCGGTCTTCGAAGCTTCCTTTGGCTACTACCCGGTGGAAACAACTGAAGCTTCAACGCCTTTTTTTCCTATCTTCTTTAGCACCGGGCTAGGGAGTAAGCCCGTGGAACCTTAGTTTTGTTCCCTCGGGACTTACTTGTGGTTCCTGTGGTGCGCTCCTGACCCTGCTGCTTTGAAAGAa-	355
	15	>7-17	AAAGAAATGAGGCGAAGAAGTCCTTCAGGGATCCCCGGGGAAACCTGGAGGAAGTCCGACGAGATCGCGGCTGGGGCTTAGGACCCCACTCCTGCGAGACAGGAGTAATCCTAAACAGGGTTTTCACCCTTCCTTTAGTTTCCTTCCTCTCCTGGAGAGGTCTTCTGCCCTAGCCCGGTCTTCGAAGCTTCCTTTGGCTACTACCCGGTGGAAACAACTGAAGCTTCAACGCCTTTTTTTCCTATCTTCTTTAGCACCGGGCTAGGGAGTAAGCCCGTGGAACCTTAGTTTTGCTCCCTCGGGACTTACTTGTGGTTCCTGTGGTGCACTCCTGACCCTGCTGCTTTGAAAGAA	354
	16	>7-18	AAAGAAATGAGGCGAAGAAGTCCTTCAGGGATCCCCGGGGAAACCTGGAGGAAGTCCGACGAGATCGCGGCTGGGGCTTAGGACCCCACTCCTGCGAGACAGGAGTAATCCTAAACAGGGTTTTCACCCTTCCTTTAGTTTCCTTCCTCTCCTGGAGAGGTCTTCTGCCCTAGCCCGGTCTTCGAAGCTTCCTTTGGCTACTACCCGGTGGAAACAACTGAAGCTTCAACGCCTTTTTTTCCTATCTTCTTAAGCACCGGGCTAGGGAGTAAGCCCGTGGAACCTTAGTTTTGTTCCCTCGGGACTTACTTGTGGTTCCTGTGGTGCACTCCTGACCCTGCTGCTTTGAAAGAA	354
	17	>7-19	AAAGAAATGAGGCGAAGAAGTCCTTCAGGGATCCCCGGGGAAACCTGGAGGAAGTCCGACGAGATCGCGGCTGGGGCTTAGGACCCCACTCCTGCGAGACAGGAGTAATCCTAAACAGGGTTTTCACCCTTCCTTTAGTTTCCTTCCTCTCCTGGAGAGGTCTTCTGCCCTAGCCCGGTCTTCGAAGCTTCCTTTGGCTACTACCCGGTGGAAACAACTGAAGCTTCAACGCCTTTTTTTCCTATCTTCTTTAGCACCGGGCTAGGGAGTAAGCCCGTGGAACCTTAGTTTTGTTCCCTCGGGACTTACTTGTGGTTCCTGTGGTGCACTCCTGACCCTGCTGCTTTGAAAGAA	354
	18	>7-20	AAAgAAATGAGGCGAAGAAGTCCTTCAGGGATCCCCGGGGAAACCTGGAGGAAGTCCGACGAGATCGCGGCTGGGGCTTAGGACCCCACTCCTGCGAGACAGGAGTAATCCTAAACAGGGTTTTCACCCTTCCTTTAGTTTCCTTCCTCTCCTGGAGAGGTCTTCTGCCCTAGCCCGGTCTTCGAAGCTTCCCTTGGCTACTACCCGGTGGAAACAACTGAAGCTTCAACGCCTTTTTTTCCTATCTTCTTTAGCACCGGGCTAGGGAGTAAGCCCGTGGAACCTTAGTTTTGTTCCCTCGGGACTTACTTGTGGTTCCTGTGGTGCACTCCTGACCCTGCTGCTTTGAAAGAA	354
	19	>7-21	AAAGAAATGAGGCGAAGAAGTCCTTCAGGGATCCCCGGGGAAACCTGGAGGAAGTCCGACGAGATCGCGGCTGGGGCTTAGGACCCCACTCCTGCGAGACAGGAGTAATCCTAAACAGGGTTTTCACCCTTCCTTTAGTTTCCTTCCTCTCCTGGAGAGGTCTTCTGCCCTAGCCCGGTCTTCGAAGCTTCCTTTGGCTACTACCCGGTGGAAACAACTGAAGCTTCAACGCCTTTTTTTCCTATCTTCTTTAGCACCGGGCTAGGGAGTAAGCCCGTGGAACCTTAGTTTTGTTCCCTCGGGACTTACTTGTGGTTCCTGTGGTGCACTCCTGACCCTGCTGCTTTGAAAGAA	354
	20	>7-22	AAAGAAATGAGGCGAAGAAGTCCTTCAGGGATCCCCGGGGAAACCTGGAGGAAGTCCGACGAGATCGCGGCTGGGGCTTAGGACCCCACTCCTGCGAGACAGGAGTAATCCTAAACAGGGTTTTCACCCTTCCTTTAGTTTCCTTCCTCTCCTGGAGAGGTCTTCTGCCCTAGCCCGGTCCTCGAAGCTTCCTTTGGCTACTACCCGGTGGAAACAACTGAAGCTTCAACGCCTTTTTTTCCTATCTTCTTTAGCACCGGGCTAGGGAGTAAGCCCGTGGAACCTTAGTTTTGTTCCCTCGGGACTTACTTGTGGTTCCTGTGGTGCACTCCTGACCCTGCTGCTTTGAAAGAA	354
8. Froggy	1	>8-1	AAAGAAATGAGGCGAAGAAGTCCTTCAGGGATCCCCGGGGAAACCTGGAGGAAGTCCGACGAGATCGCGGCTGGGGCTTAGGACCCCACTCCTGCGAGACAGGAGTAATCCTAAACAGGGTTTTCACCCTTCCTTTAGTTTCCTTCCTCTCCTGGAGAGGTCTTCTGCCCTAGCCCGGTCTTCGAAGCTTCCTTTGGCTACTACCCGGTGGAAACAACTGAAGCTTCAACGCCTTTTTTTCCAATCTTCTTTAGCACCGGGCTAGGGAGTAAGCCCGTGGAACCTTAGTTTTGTTCCCTCGGGACTTACTTGTGGTTCCTGTGGTGCACTCCTGACCCTGCTGCTTTGAAAGAA	354
	2	>8-2	AAAGAAATGAGGCGAAGAAGTCCTTCAGGGATCCCCGGGGAAACCTGGAGGAAGTCCGACGAGATCGCGGCTGGGGCTTAGGACCCCACTCCTGCGAGACAGGAGTAATCCTAAACAGGGTTTTCACCCTTCCTTTAGTTTCCTTCCTCTCCTGGAGAGGTCTTCTGCCCTAGCCCGGTCTTCGAAGCTTCCTTTGGCTACTACCCGGTGGAAACAACTGAAGCTTCAACGCCTTTTTTTCCAATCTTCTTTAGCACCGGGCTAGGGAGTAAGCCCGTGGAACCTTAGTTTTGTTCCCTCGGGACTTACTTGTGGTTCCTGTGGTGCACTCCTGACCCTGCTGCTTTGAAAGAA	354
	3	>8-3	AAAGAAATGAGGCGAAGAAGTCCTTCAGGGATCCCCGGGGAAACCTGGAGGAAGTCCGACGAGATCGCGGCTGGGGCTTAGGACCCCACTCCTGCGAGACAGGAGTAATCCTAAACAGGGTTTTCACCCTTCCTTTAGTTTCCTTCCTCTCCTGGAGAGGTCTTCTGCCCTAGCCCGGTCTTCGAAGCTTCCTTTGGCTACTACCCGGTGGAAACAACTGAAGCTTCAACGCCTTTTTTTCCAATCTTCTTTAGCACCGGGCTAGGGAGTAAGCCCGTGGAACCTTAGTTTTGTTCCCTCGGGACTTACTTGTGGTTCCTGTGGTGCACTCCTGACCCTGCTGCTTTGAAAGAA	354
	4	>8-4	AAAGAAATGAGGCGAAGAAGTCCTTCAGGGATCCCCGGGGAAACCTGGAGGAAGTCCGACGAGATCGCGGCTGGGGCTTAGGACCCCACTCCTGCGAGACAGGAGTAATCCTAAACAGGGTTTTCACCCTTCCTTTAGTTTCCTTCCTCTCCTGGAGAGGTCTTCTGCCCTAGCCCGGTCTTCGAAGCTTCCTTTGGCTACTACCCGGTGGAAACAACTGAAGCTTCAACGCCTTTTTTTCCAATCTTCTTTAGCACCGGGCTAGGGAGTAAGCCCGTGGAACCTTAGTTTTGTTCCCTCGGGACTTACTTGTGGTTCCTGTGGTGCACTCCTGACCCTGCTGCTTTGAAAGAA	354
	5	>8-5	AAAGAAATGAGGCGAAGAAGTCCTTCAGGGATCCCCGGGGAAACCTGGAGGAAGTCCGACGAGATCGCGGCTGGGGCTTAGGACCCCACTCCTGCGAGACAGGAGTAATCCTAAACAGGGTTTTCACCCTTCCTTTAGTTTCCTTCCTCTCCTGGAGAGGTCTTCTGCCCTAGCCCGGTCTTCGAAGCTTCCTTTGGCTACTACCCGGTGGAAACAACTGAAGCTTCAACGCCTTTTTTTCCAATCTTCTTTAGCACCGGGCTAGGGAGTAAGCCCGTGGAACCTTAGTTTTGTTCCCTCGGGACTTACTTGTGGTTCCTGTGGTGCACTCCTGACCCTGCTGCTTTGAAAGAA	354
	6	>8-6	AAAGAAATGAGGCGAAGAAGTCCTTCAGGGATCCCCGGGGAAACCTGGAGGAAGTCCGACGAGATCGCGGCTGGGGCTTAGGACCCCACTCCTGCGAGACAGGAGTAATCCTAAACAGGGTTTTCACCCTTCCTTTAGTTTCCTTCCTCTCCTGGAGAGGTCTTCTGCCCTAGCCCGGTCTTCGAAGCTTCCTTTGGCTACTACCCGGTGGAAACAACTGAAGCTTCAACGCCTTTTTTTCCAATCTTCTTTAGCACCGGGCTAGGGAGTAAGCCCGTGGAACCTTAGTTTTGTTCCCTCGGGACTTACTTGTGGTTCCTGTGGTGCACTCCTGACCCTGCTGCTTTGAAAGAA	354
	7	>8-7	AAAGAAATGAGGCGAAGAAGTCCTTCAGGGATCCCCGGGGAAACCTGGAGGAAGTCCGACGAGATCGCGGCTGGGGCTTAGGACCCCACTCCTGCGAGACAGGAGTAATCCTAAACAGGGTTTTCACCCTTCCTTTAGTTTCCTTCCTCTCCTGGAGAGGTCTTCTGCCCTAGCCCGGTCTTCGAAGCTTCCTTTGGCTACTACCCGGTGGAAACAACTGAAGCTTCAACGCCTTTTTTTCCAATCTTCTTTAGCACCGGGCTAGGGAGTAAGCCCGTGGAACCTTAGTTTTGTTCCCTCGGGACTTACTTGTGGTTCCTGTGGTGCACTCCTGACCCTGCTGCTTTGAAAGAA	354
	8	>8-8	AAAGAAATGAGGCGAAGAAGTCCTTCAGGGATCCCCGGGGAAACCTGGAGGAAGTCCGACGAGATCGCGGCTGGGGCTTAGGACCCCACTCCTGCGAGACAGGAGTAATCCTAAACAGGGTTTTCACCCTTCCTTTAGTTTCCTTCCTCTCCTGGAGAGGTCTTCTGCCCTAGCCCGGTCTTCGAAGCTTCCTTTGGCTACTACCCGGTGGAAACAACTGAAGCTTCAACGCCTTCTTTTCCAATCTTCTTTAGCACCGGGCTAGGGAGTAAGCCCGTGGAACCTTAGTTTTGTTCCCTTGGGACTTACTTGTGGTTCCTGTGGTGCACTCCTGACCCTGCTGCTTTGAAAGAA	354
	9	>8-9	AAAGAAATGAGGCGAAGAAGTCCTTCAGGGATCCCCGGGGAAACCTGGAGGAAGTCCGACGAGATCGCGGCTGGGGCTTAGGACCCCACTCCTGCGAGACAGGAGTAATCCTAAACAGGGTTTTCACCCTTCCTTTAGTTTCCTTCCTCTCCTGGAGGGGTCTTCTGCCCTAGCCCGGTCTTCGAAGCTTCCTTTGGCTACTACCCGGTGGAAACAACTGAAGCTTCAACGCCTTTTTTTCCAATCTTCTTTAGCACCGGGCTAGGGAGTAAGCCCGTGGAACCTTAGTTTTGTTCCCTCGGGACTTACTTGTGGTTCCTGTGGTGCACTCCTGACCCTGCTGCTTTGAAAGAA	354
	10	>8-10	AAAGAAATGAGGCGAAGAAGTCCTTCAGGGATCCCCGGGGAAACCTGGAGGAAGTCCGACGAGATCGCGGCTGGGGCTTAGGACCCCACTCCTGCGAGACAGGAGTAATCCTAAACAGGGTTTTCACCCTTCCTTTAGTTTCCTTCCTCTCCTGGAGAGGTCTTCTGCCCTAGCCCGGTCTTCGAAGCTTCCTTTGGCTACTACCCGGTGGAAACAACTGAAGCTTCAACGCCTTTTTTTCCAATCTTCTTTAGCACCGGGCTAGGGAGTAAGCCCGTGGAACCTTAGTTTTGTTCCCTCGGGACTTACTTGTGGTTCCTGTGGTGCACTCCTGACCCTGCTGCTTTGAAAGAA	354
	11	>8-11	AAAGAAATGAGGCGAAGAAGTCCTTCAGGGATCCCCGGGGAAACCTGGAGGAAGTCCGACGAGATCGCGGCTGGGGCTTAGGACCCCACTCCTGCGAGACAGGAGTAATCCTAAACAGGGTTTTCACCCTTCCTTTAGTTTCCTTCCTCTCCTGGAGAGGTCTTCTGCCCTAGCCCGGTCTTCGAAGCTTCCTTCGGCTACTACCCGGTGGAAACAACTGAAGCTTCAACGCCTTTTTTTCCAATCTTCTTTAGCACCGGGCTAGGGAGTAAGCCCGTGGAACCTTAGTTTTGTTCCCTCGGGACATACTTGTGGTTCCTGTGGTGCACTCCTGACCCTGCTGCTTTGAAAGAA	354
	12	>8-12	AAAGAAATGAGGCGAAGAAGTCCTTCAGGGATCCCCGGGGAAACCTGGAGGAAGTCCGACGAGATCGCGGCTGGGGCTTAGGACCCCACTCCTGCGAGACAGGAGTAATCCTAAACAGGGTTTTCACCCTTCCTTTAGTTTCCTTCCTCTCCTGGAGAGGTCTTCTGCCCTAGCCCGGTCTTCGAAGCTTCCTTTGGCTACTACCCGGTGGAAACAACTGAAGCTTCAACGCCTTTTTTTCCAATCTTCTTTAGCACCGGGCTAGGGAGTAAGCCCGTGGAACCTTAGTTTTGTTCCCTCGGGACTTACTTGTGGTTCCCGTGGTGCACTCCTGACCCTGCTGCTTTGAAAGAA	354
	13	>8-13	AAAGAAATGAGGCGAAGAAGTCCTTCAGGGATCCCCGGGGAAACCTGGAGGAAGTCCGACGAGATCGCGGCTGGGGCTTAGGACCCCACTCCTGCGAGACAGGAGTAATCCTAAACAGGGTTTTCACCCTTCCTTTAGTTTCCTTCCTCTCCTGGAGAGGTCTTCTGCCCTAGCCCGGTCTTCGAAGCTTCCTTTGGCTACTACCCGGTGGAAACAACTGAAGCTTCAACGCCTTTTTTTCCAATCTTCTTTAGCACCGGGCTAGGGAGTAAGCCCGTGGAACCTTAGTTTTGTTCCCTCGGGACTTACTTGTGGTTCCTGTGGTGCACTCCTGACCCTGCTGCTTTGAAAGAA	354
	14	>8-14	AAAGAAATGAGGCGAAGAAGTCCTTCAGGGATCCCCGGGGAAACCTGGAGGAAGTCCGACGAGATCGCGGCTGGGGCTTAGGACCCCACTCCTGCGAGACAGGAGTAATCCTAAACAGGGTTTTCACCCTTCCTTTAGTTTCCTTCCTCTCCTGGAGAGGTCTTCTGCCCTAGCCCGGTCTTCGAAGCTTCCTTTGGCTACTACCCGGTGGAAACAACTGAAGCTTCAACGCCTTTTTTTCCAATCTTCATTAGCACCGGGCTAGGGAGTAAGCCCGTGGAACCTTAGTTTTGTTCCCTCGGGACTTACTTGTGGTTCCTGTGGTGCACTCCTGACCCTGCTGCTTTGAAAGAA	354
	15	>8-15	AAAGAAATGAGGCGAAGAAGTCCTTCAGGGATCCCCGGGGAAACCTGGAGGAAGTCCGACGAGATCGCGGCTGGGGCTTAGGACCCCACTCCTGCGAGACAGGAGTAATCCTAAACAGGGTTTTCACCCTTCCTTTAGTTTCCTTCCTCTCCTGGAGAGGTCTTCTGCCCTAGCCCGGTCTTCGAAGCTTCCTTTGGCTACTACCCGGTGGAAACAACTGAAGCTTCAACGCCTTTTTTTCCAATCTTCTTTAGCACCGGGCTAGGGAGTAAGCCCGTGGAACCTTAGTTTTGTTCCCTCGGGACTTACTTGTGGTTCCTGTGGTGCACTCCTGACCCTGCTGCTTTGAAAGAA	354
	16	>8-16	AAAGAAATGAGGCGAAGAAGTCCTTCAGGGATCCCCGGGGAAACCTGGAGGAAGTCCGACGAGATCGCGGCTGGGGCTTAGGACCCCACTCCTGCGAGACAGGAGTAATCCTAAACAGGGTTTTCACCCTTCCTTTAGTTTCCTTCCTCTCCTGGAGAGGTCTTCTGCCCTAGCCCGGTCTTCGAAGCTTCCTTTGGCTACTACCCGGTGGAAACAACTGAAGCTTCAACGCCTTTTTTTCCAATCTTCTTTAGCACCGGGCTAGGGAGTAAGCCCGTGGAACCTTAGTTTTGTTCCCTCGGGACTTACTTGTGGTTCCTGTGGTGCACTCCTGACCCTGCTGCTTTGAAAGAA	354
	17	>8-17	AAAGAAATGAGGCGAAGAAGTCCTTCAGGGATCCCCGGGGAAACCTGGAGGAAGTCCGACGAGATCGCGGCTGGGGCTTAGGACCCCACTCCTGCGAGACAGGAGTAATCCTAAACAGGGTTTTCACCCTTCCTTTAGTTTCCTTCCTCTCCTGGAGAGGTCTTCTGCCCTAGCCCGGTCTTCGAAGCTTCCTTTGGCTACTACCCGGTGGAAACAACTGAAGCTTCAACGCCTTTTTTTCCAATCTTCTTTAGCACCGGGCTAGGGAGTAAGCCCGTGGAACCTTAGTTTTGTTCCCTCGGGACTTACTTGTGGTTCCTGTGGTGCACTCCTGACCCTGCTGCTTTGAAAGAA	354
	18	>8-18	AAAGAAATGAGGCGAAGAAGTCCTTCAGGGATCCCCGGGGAAACCTGGAGGAAGTCCGACGAGATCGCGGCTGGGGCTTAGGACCCCACTCCTGCGAGACAGGAGTAATCCTAAACAGGGTTTTCACCCTTCCTTTAGTTTCCTTCCTCTCCTGGAGAGGTCTTCTGCCCTAGCCCGGTCTTCGAAGCTTCCTTTGGCTACTACCCGGTGGAAACAACTGAAGCTTCAACGCCTTTTTTTCCAATCTTCTTTAGCACCGGGCTAGGGAGTAAGCCCGTGGAACCTTAGTTTTGTTCCCTCGGGACTTACTTGTGGTTCCTGTGGTGCACTCCTGACCCTGCTGCTTTGAAAGAA	354
	19	>8-19	AAAGAAATGAGGCGAAGAAGTCCTTCAGGGATCCCCGGGGAAACCTGGAGGAAGTCCGACGAGATCGCGGCTGGGGCTTAGGACCCCACTCCTGCGAGACAGGAGTAATCCTAAACAGGGTTTTCACCCTTCCTTTAGTTTCCTTCCTCTCCTGGAGAGGTCTTCTGCCCTAGCCCGGTCTTCGAAGCTTCCTTTGGCTACTACCCGGTGGAAACAACTGAAGCTTCAACGCCTTTTTTTCCAATCTTCTTTAGCACCGGGCTAGGGAGTAAGCCCGTGGAACCTTAGTTTTGTTCCCTCGGGACTTACTTGTGGTTCCTGTGGTGCACTCCTGACCCTGCTGCTTTGAAAGAA	354
	20	>8-20	AAAGAAATGAGGCGAAGAAGTCCTTCAGGGATCCCCGGGGAAACCTGGAGGAAGTCCGACGAGATCGCGGCTGGGGCTTAGGACCCCACTCCTGCGAGACAGGAGTAATCCTAAACAGGGTTTTCACCCTTCCTTTAGTTTCCTTCCTCTCCTGGAGAGGTCTTCTGCCCTAGCCCGGTCTTCGAAGCTTCCTTTGGCTACTACCCGGTGGAAACAACTGAAGCTTCAACGCCTTTTTTTCCAATCTTCTTTAGCACCGGGCTAGGGAGTAAGCCCGTGGAACCTTAGTTTTGTTCCCTCGGGACTTACTTGTGGTTCCTGTGGTGCACTCCTGACCCTGCTGCTTTGAAAGAA	354
	21	>8-21	AAAGAAATGAGGCGAAGAAGTCCTTCAGGGATCCCCGGGGAAACCTGGAGGAAGTCCGACGAGATCGCGGCTGGGGCTTAGGACCCCACTCCTGCGAGACAGGAGTAATCCTAAACAGGGTTTTCACCCTTCCTTTAGTTTCCTTCCTCTCCTGGAGAGGTCTTCTGCCCTAGCCCGGTCTTCGAAGCTTCCTTTGGCTACTACCCGGTGGAAACAACTGAAGCTTCAACGCCTTTTTTTCCAATCTTCTTTAGCACCGGGCTAGGGAGTAAGCCCGTGGAACCTTAGTTTTGTTCCCTCGGGACTTACTTGTGGTTCCTGTGGTGCACTCCTGACCCTGCTGCTTTGAAAGAA	354
	22	>8-22	AAAGAAATGAGGCGAAGAAGTCCTTCAGGGATCCCCGGGGAAACCTGGAGGAAGTCCGACGAGATCGCGGCTGGGGCTTAGGACCCCACTCCTGCGAGACAGGAGTAATCCTAAACAGGGTTTTCACCCTTCCTTTAGTTTCCTTCCTCTCCTGGAGAGGTCTTCTGCCCTAGCCCGGTCTTCGAAGCTTCCTTTGGCTACTACCCGGTGGAAACAACTGAAGCTTCAACGCCTTTTTTTCCAATCTTCTTTAGCACCGGGCTAGGGAGTAAGCCCGTGGAACCTTAGTTTTGTTCCCTCGGGACTTACTTGTGGTTCCTGTGGTGCACTCCTGACCCTGCTGCTTTGAAAGAA	354
9. Fire Pink	1	>9-1	AAAGAAATGAGGCGAAGAAGTCCTTCAGGGATCCCCGGGGAAACCTGGAGGAAGTCCGACGAGATCGCGGCTGGGGCTTAGGACCCCACTCCTGCGAGACGGGAGTAATCCTAAACAGGGTTTTCACCCTTCCTTTAGTTTCCTTCCTCTCCTGGAGAGGTCTTCTGCCCTAGCCCGGTCTTCGAAGCTTCCTTTGGCTATTACCCGGTGGAAACAACTGAAGCTTCAACGCCCTTTTTTCCTATCTTCTTTAGCACCGGGCTAGGGAGTAAGCCCGTGGAACCTTAGTTTTGTTCCCTCGGGACTTACTTGTGGTTCCTGTGGTGCACTCCTGACCCTGCTGCTTTGAAAGAA	354
	2	>9-11	AAAGAAATGAGGCGAAGAAGTCCTTCAGGGATCCCCGGGGAAACCTGGAGGAAGTCCGACGAGATCGCGGCTGGGGCTTAGGACCCCACTCCTGCGAGACGGGAGTAATCCTAAACAGGGTTTTCACCCTTCCTTTAGTTTCCTTCCTCTCCTGGAGAGGTCTTCTGCCCTAGCCCGGTCTTCGAAGCTTCCTTTGGCTATTACCCGGTGGAAACAACTGAAGCTTCAACGCCTTTTTTTCCTATCTTCTTTAGCACCGGGCTAGGGGGTAAGCCCGTGGAACCTTAGTCTTGTTCCCTCGGGACTTACTTGTGGTTCCTGTGGTGCACTCCTGACCCTGCTGCTTTGAAAGAA	354
	3	>9-13	AAAGAAATGAGGCGAAGAAGTCCTTCAGGGATCCCCGGGGAAACCTGGAGGAAGTCCGACGAGATCGCGGCTGGGGCTTAGGACCCCACTCCTGCGAGACGGGAGTAATCCTAAACAGGGTTTTCACCCTTCCTTTAGTTTCCTTCCTCTCCTGGAGAGGTCTTCTGCCCTAGCCCGGTCTTCGAAGCTTCCTTTGGCTATTACCCGGTGGAGACAACTGAAGCTTCAACGCCTTTTTTTCCTATCTTCTTTAGCACCGGGCTAGGGAGTAAGCCCGTGGAACCTTAGTTTTGTTCCCTCGGGACTTACTTGTGGTTCCTGTGGTGCACTCCTGACCCTGCTGCTTTGAAAGAA	354
	4	>9-14	AAAGAAATGAGGCGAAGAAGTCCTTCAGGGATCCCCGGGGAAACCTGGAGGAAGTCCGACGAGATCGCGGCTGGGGCTTAGGACCCCACTCCTGCGAGACGGGAGTAATCCTAAACAGGGTTTTCACCCTTCCTTTAGTTTCCTTCCTCTCCTGGAGAGGTCTTCTGCCCTAGCCCGGTCTTCGAAGCTTCCTTTGGCTATTACCCGGTGGAAACAACTGAAGCTTCAACGCCTTTTTTTCCTATCTTCTTTAGCACCGGGCTAGGGAGTAAGCCCGTGGAACCTTAGTTTTGTTCCCTCGGGACTTACTTGTGGTTCCTGTGGTGCACTCCTGACCCTGCTGCTTTGAAAGAA	354
	5	>9-15	AAAGAAATGAGGCGAAGAAGTCCTTCAGGGATCCCCGGGGAAACCTGGAGGAAGTCCGACGAGATCGCGGCTGGGGCTTAGGACCCCACTCCTGCGAGACGGGAGTAATCCTAAACAGGGTTTTCACCCTTCCTTTAGTTTCCTTCCTCTCCTGGAGAGGTCTTCTGCCCTAGCCCGGTCTTCGAAGCTTCCTTTGGCTATTACCCGGTGGAAACAACTGAAGCTTCAACGCCTTTTTTTCCTATCTTCTTTAGCACCGGGCTAGGGAGTAAGCCCGTGGAACCTTAGTTTTGTTCCCTCGGGACTTACTTGTGGTTCCTGTGGTGCACTCCTGACCCTGCTGCTTTGAAAGAA	354
	6	>9-19	AAAGAAATGAGGCGAAGAAGTCCTTCAGGGATCCCCGGGGAAACCTGGAGGAAGTCCGACGAGATCGCGGCTGGGGCTTAGGACCCCACTCCTGCGAGACGGGAGTAATCCTAAACAGGGTTTTCACCCTTCCTTTAGTTTCCTTCCTCTCCTGGAGAGGTCTTCTGCCCTAGCCCGGTCTTCGAAGCTTCCTTTGGCTATTACCCGGTGGAAACAACTGAAGCTTCAACGCCTTTTTTTCCTATCTTCTTTAGCACCGGGCTAGGGAGTAAGCCCGTGGAACCTTAGTTTTGTTCCCTCGGGACTTACTTGTGGTTCCTGTGGTGCACTCCTGACCCTGCTGCTTTGAAAGAA	354
	7	>9-23	AAAGAAATGAGGCGAAGAAGTCCTTCAGGGATCCCCGGGGAAACCTGGAGGAAGTCCGACGAGATCGCGGCTGGGGCTTAGGACCCCACTCCTGCGAGACGGGAGTAATCCTAAACAGGGTTTTCACCCTTCCTTTAGTTTCCTTCCTCTCCTGGAGAGGTCTTCTGCCCTAGCCCGGTCTTCGAAGCTTCCTTTGGCTATTACCCGGTGGAAACAACTGAAGCTTCAACGCCTTTTTTTCCTATCTTCTTTAGCACCGGGCTAGGGAGTAAGCCCGTGGAACCTTAGTTTTGTTCCCTCGGGACTTACTTGTGGTTCCTGTGGTGCACTCCTGACCCTGCTGCTTTGAAAGAA	354
	8	>9-30	AAAGAAATGAGGCGAAGAAGTCCTTCAGGGATCCCCGGGGAAACCTGGAGGAAGTCCGACGAGATCGCGGCTGGGGCTTAGGACCCCACTCCTGCGAGACGGGAGTAATCCTAAACAGGGTTTTCACCCTTCCTTTAGTTTCCTTCCTCTCCTGGAGAGGTCTTCTGCCCTAGCCCGGTCTTCGAAGCTTCCTTTGGCTATTACCCGGTGGAAACAACTGAAGCTTCAACGCCTTTTTTTCCTATCTTCTTTAGCACCGGGCTAGGGAGTAAGCCCGTGGAACCTTAGTTTTGTTCCCTCGGGACTTACTTGTGGTTCCTGTGGTGCACTCCTGACCCTGCTGCTTTGAAAGAA	354
	9	>9-31	AAAGAAATGAGGCGAAGAAGTCCTTCAGGGATCCCCGGGGAAACCTGGAGGAAGTCCGACGAGATCGCGGCTGGGGCTTAGGACCCCACTCCTGCGAGACGGGAGTAATCCTAAACAGGGTTTTCACCCTTCCTTTAGTTTCCTTCCTCTCCTGGAGAGGTCTTCTGCCCTAGCCCGGTCTTCGAAGCTTCCTTTGGCTATTACCCGGTGGAAACAACTGAAGCTTCAACGCCTTTTTTTCCTATCTTCTTTAGCACCGGGCTAGGGAGTAAGCCCGTGGAACCTTAGTTTTGTTCCCTCGGGACTTACTTGTGGTTCCTGTGGTGCACTCCTGACCCTGCTGCTTTGAAAGAA	354
	10	>9-36	AAAGAAATGAGGCGAAGAAGTCCTTCAGGGATCCCCGGGGAAACCTGGAGGAAGTCCGACGAGATCGCGGCTGGGGCTTAGGACCCCACTCCTGCGAGACGGGAGTAATCCTAAACAGGGTTTTCACCCTTCCTTTAGTTTCCTTCCTCTCCTGGAGAGGTCTTCTGCCCTAGCCCGGTCTTCGAAGCTTCCTTTGGCTATTACCCGGTGGAAACAACTGAAGCTTCAACGCCTTTTTTTCCTATCTTCTTTAGCACCGGGCTAGGGAGTAAGCCCGTGGAACCTTAGTTTTGTTCCCTCGGGACTTACTTGTGGTTCCTGCGGTGCACTCCTGACCCTGCTGCTTTGAAAGAA	354
	11	>9-41	AAAGAAATGAGGCGAAGAAGTCCTTCAGGGATCCCCGGGGAAACCCGGAGGAAGTCCGACGAGATCGCGGCTGGGGCTTAGGACCCCACTCCTGCGAGACGGGAGTAATCCTAAACAGGGTTTTCACCCTTCCTTTAGTTTCCTTCCTCTCCTGGAGAGGTCTTCTGCCCTAGCCCGGTCTTCGAAGCTTCCTTTGGCTATTACCCGGTGGAAACAACTGAAGCTTCAACGCCTTTTTTTCCTATCTTCTTTAGCACCGGGCTAGGGAGTAAGCCCGTGGAACCTTAGTTTTGTTTCCTCGGGACTTACTTGTGGTTCCTGTGGTGCACTCCTGACCCTGCTGCTTTGAAAGAA	354
	12	>9-47	AAAGAAATGAGGCGAAGAAGTCCTTCAGGGATCCCCGGGGAAACCCGGAGGAAGTCCGACGAGATCGCGGCTGGGGCTTAGGACCCCACTCCTGCGAGACAGGAGTAATCCTAAACAGGGTTTTCACCCTTCCTTTAGTTTCCTTCCTCTCCTGGGGAGGTCTTCTGCCCTAGCCCGGTCTTCGAAGCTTCCTTTGGCTACTACCCGGTGGAAACAACTGAAGCTTCAACGCCTTTTTTTCCTATCTTCTTTAGCACCGGGCTAGGGAGTAAGCCCGTGGAACCTTAGTTTTGTTCCCTCGGGACTTACTTGTGGTTCCTGTGGTGCACTCCTGACCCTGCTGCTTTGAAAGAA	354
	13	>9-5	AAAGAAATGAGGCGAAGAAGTCCTTCAGGGATCCCCGGGGAAACCTGGAGGAAGTCCGACGAGATCGCGGCTGGGGCTTAGGACCCCACTCCTGCGAGACGGGAGTAATCCTAAACAGGGTTTTCACCCTTCCTTTAGTTTCCTTCCTCTCCTGGAGAGGTCTTCTGCCCTAGCCCGGTCTTCGAAGCTTCCTTTGGCTATTACCCGGTGGAAACAACTGAAGCTTCAACGCCTTTTTTTCCTATCTTCCTTAGCACCGGGCTAGGGAGTAAGCCCGTGGAACCTTAGTTTTGTTCCCTCGGGACTTACTTGTGGTTCCTGTGGTGCACTCCTGACCCTGCTGCTTTGAAAGAA	354
	14	>9-50	AAAGAAATGAGGCGAAGAAGTCCTTCAGGGATCCCCGGGGAAACCTGGAGGAAGTCCGACGAGATCGCGGCTGGGGCTTAGGACCCCACTCCTGCGAGACGGGAGTAATCCTAAACAGGGTTTTCACCCTTCCTTTAGTTTCCTTCCTCTCCTGGAGAGGTCTTCTGCCCTAGCCCGGTCTTCGAAGCTTCCTTTGGCTATTACCCGGTGGAAACAACTGAAGCTTCAACGCCTTTTTTTCCTATCTTCTTTAGCACCGGGCTAGGGAGTAAGCCCGTGGAACCTTAGTTTTGTTCCCTCGGGACTTACTTGTGGTTCCTGTGGTGCACTCCTGACCCTGCTGCTTTGAAAGAA	354
	15	>9-51	AAAGAAATGAGGCGAAGAAGTCCTTCAGGGATCCCCGGGGAAACCCGGAGGAAGTCCGACGAGATCGCGGCTGGGGCTTAGGACCCCACTCCTGCGAGACAGGAGTAATCCTAAACAGGGTTTTCACCCTTCCTTTAGTTTCCTTCCTCTCCTGGAGAGGTCTTCTGCCCTAGCCCGGTCTTCGAAGCTTCCTTTGGCTACTACCCGGTGGAAACAACTGAAGCTTCAACGCCTTTTTTTCCCATCTTCTTTAGCACCGGGCTAGGGAGTAAGCCCGTGGAACCTTAGTTTTGTTCCCTCGGGACTTACTTGTGGTTCCTGTGGTGCACTCCTGACCCTGCTGCTTTGAAAGAA	354
	16	>9-54	AAAGAAATGAGGCGAAGAAGTCCTTCAGGGATCCCCGGGGAAACCTGGAGGAAGTCCGACGAGATCGCGGCTGGGGCTTAGGACCCCACTCCTGCGAGACAGGAGTAATCCTAAACAGGGTTTTCACCCTTCCTTTAGTTTCCTTCCTCTCCTGGAGAGGTCTTCTGCCCTAGCCCGGTCTTCGAAGCTTCCTTTGGCTACTACCCGGTGGAAACAACTGAAGCTTCAACGCCTTTTTTTCCAATCTTCTTTAGCACCGGGCTAGGGAGTAAGCCCGTGGAACCTTAGTTTTGTTCCCTCGGGACTTACTTGTGGTTCCTGTGGTGCACTCCTGACCCTGCTGCTTTGAAAGAA	354
	17	>9-55	AAAGAAATGAGGCGAAGAAGTCCTTCAGGGATCCCCGGGGAAACCTGGAGGAAGTCCGACGAGATCGCGGCTGGGGCTTAGGACCCCACTCCTGCGAGACGGGAGTAATCCTAAACAGGGTTTTCACCCTTCCTTTAGTTTCCTTCCTCTCCTGGAGAGGTCTTCTGCCCTAGCCCGGTCTTCGAAGCTTCCTTTGGCTATTACCCGGTGGAAACAACTGAAGCTTCAACGCCTTTTTTTCCTATCTTCTTTAGCACCGGGCTAGGGAGTAAGCCCGTGGAACCTTAGTTTTGTTCCCTCGGGACTTACTTGTGGTTCCTGTGGTGCACTCCTGACCCTGCTGCTTTGAAAGAA	354
	18	>9-58	AAAGAAATGAGGCGAAGAAGTCCTCCAGGGATCCCCGGGGAAACCTGGAGGAAGTCCGACGAGATCGCGGCTGGGGCTTAGGACCCCACTCCTGCGGGACGGGAGTAATCCTAAACAGGGTTTTCACCCTTCCTTTAGTTTCCTTCCTCTCCTGGAGAGGTCTTCTGCCCTAGCCCGGTCTTCGAAGCTTCCTTTGGCTATTACCCGGTGGAAACAACTGAAGCTTCAACGCCTTTTTTTCCTATCTTCTTTAGCACCGGGCTAGGGAGTAAGCCCGTGGAACCTTAGTTTTGTTCCCTCGGGACTTACTTGTGGTTCCTGTGGTGCACTCCTGACCCTGCTGCTTTGAAAGAA	354
	19	>9-59	AAAGAAATGAGGCGAAGAAGTCCTTCAGGGATCCCCGGGGAAACCTGGAGGAAGTCCGACGAGATCGCGGCTGGGGCTTAGGACCCCACTCCTGCGAGACGGGAGTAATCCTAAACAGGGTTTTCACCCTTCCTTTAGTTTCCTTCCTCTCCTGGAGAGGTCTTCTGCCCTAGCCCGGTCTTCGAAGCTTCCTTTGGCTATTACCCGGTGGAAACAACTGAAGCTTCAACGCCTTTTTTTCCTATCTTCCTTAGCACCGGGCTAGGGAGTAAGCCCGTGGAACCTTAGTTTTGTTCCCTCGGGACTTACTTGTGGTTCCTGTGGTGCACTCCTGACCCTGCTGCTTTGAAAGAA	354
	20	>9-60	AAAGAAATGAGGCGAAGAAGTCCTTCAGGGATCCCCGGGGAAACCTGGAGGAAGTCCGACGAGATCGCGGCTGGGGCTTAGGACCCCACTCCTGCGAGACGGGAGTAATCCTAAACAGGGTTTTCACCCTTCCTTTAGTTTCCTTCCTCTCCTGGAGAGGTCTTCTGCCCTAGCCCGGTCTTCGAAGCTTCCTTTGGCTATTACCCGGTGGAAACAACTGAAGCTTCAACGCCTTTTTTTCCTATCTTCTTTAGCACCGGGCTAGGGAGTAAGCCCGTGGAACCTTAGTTTTGTTCCCTCGGGACTTACTTGTGGTTCCTGTGGTGCACTCCTGACCCTGCTGCTTTGAAAGAA	354
	21	>9-62	AAAGAAATGAGGCGAAGAAGTCCTTCAGGGATCCCCGGGGAAACCTGGAGGAAGTCCGACGAGATCGCGGCTGGGGCTTAGGACCCCACTCCTGCGAGACAGGAGTAATCCTAAACAGGGTTTTCACCCTTCCTTTAGTTTCCTTCCTCTCCTGGAGAGGTCTTCTGCCCTAGCCCGGTCTTCGAAGCTTCCTTTGGCTACTACCCGGTGGAAACAACTGAAGCTTCAACGCCTTTTTTTCCTATCTTCCTTAGCACCGGGCTAGGGAGTAAGCCCGTGGAACCTTAGTTTTGTTCCCTCGGGACTTACTTGTGGTTCCTGTGGTGCACTCCTGACCCTGCTGCTTTGAAAGAA	354
	22	>9-63	AAAGAAATGAGGCGAAGAAGTCCTTCAGGGATCCCCGGGGAAACCTGGAGGAAGTCCGACGAGATCGCGGCTGGGGCTTAGGACCCCACTCCTGCGAGACAGGAGTAATCCTAAACAGGGTTTTCACCCTTCCTTTAGTTTCCTTCCTCTCCTGGAGAGGTCTTCTGCCCTAGCCCGGTCTTCGAAGCTTCCTTTGGCTACTACCCGGTGGAAACAACTGAAGCTTCAACGCCTTTTTTTCCAATCTTCTCTAGCACCGGGCTAGGGAGTAAGCCCGTGGAACCTTAGTTTTGTTCCCTCGGGACTTACTTGTGGTTCCTGTGGTGCACTCCTGACCCTGCTGCTTTGAAAGAA	354
	23	>9-64	AAAGAAATGAGGCGAAGAAGTCCTTCAGGGATCCCCGGGGAAACCTGGAGGAAGTCCGACGAGATCGCGGCTGGGGCTTAGGACCCCACTCCTGCGAGACGGGAGTAATCCTAAACAGGGTTTTCACCCTTCCTTTAGTTTCCTTCCTCTCCTGGAGAGGTCTTCTGCCCTAGCCCGGTCTTCGAAGCTTCCTTTGGCTATTACCCGGTGGAAACAACTGAAGCTTCAACGCCTTTTTTTCCTATCTTCTTTAGCACCGGGCTAGGGAGTAAGCCCGTGGAACCTTAGTTTTGTTCCCTCGGGACTTACTTGTGGTTCCTGTGGTGCACTCCTGACCCTGCTGCTTTGAAAGAA	354
	24	>9-7	AAAGAAATGAGGCGAAGAAGTCCTTCAGGGATCCCCGGGGAAACCTGGAGGAAGTCCGACGAGATCGCGGCTGGGGCTTAGGACCCCACTCCTGCGAGACGGGAGTAATCCTAAACAGGGTTTTCACCCTTCCTTTAGTTTCCTTCCTCTCCTGGAGAGGTCTTCTGCCCTAGCCCGGTCTTCGAAGCTTCCTTTGGCTATTACCCGGTGGAAACAACTGAGGCTTCAACGCCTTTTCTTCCTATCTTCTTTAGCACCGGGCTAGGGAGTAAGCCCGTGGAACCTTAGTTTTGTTCCCTCGGGGCTTACTTGTGGTTCCTGTGGTGCACTCCTGACCCTGCTGCTTTGAAAGAA	354
10. Pink This Plus	1	>11-1	AAAGAAATGAGGCGAAGAAGTCCTTCAGGGATCCCCGGGGAAACCTGGAGGAAGTCCGACGAGATCGCGGCTGGGGCTTAGGACCCCACTCCTGCGAGACGGGAGTAATCCTAAACAGGGTTTTCACCCTTCCTTTAGTTTCCTTCCTCTCCTGGAGAGGTCTTCTGCCCTAGCCCGGTCTTCGAAGCTTCCTTTGGCTATTACCCGGTGGAAACAACTGAAGCTTCAACGCCTTTTTTTCCTATCTTCTTTAGCACCGGGCTAGGGAGTAAGCCCGTGGAACCTTAGTTTTGTTCCCTCGGGACTTACTTGTGGTTCCTGTGGTGCACTCCTGACCCTGCTGCTTTGAAAGAA	354
	2	>11-3	AAAGAAATGAGGCGAAGAAGTCCTTCAGGGATCCCCGGGGAAACCTGGAGGAAGTCCGACGAGATCGCGGCTGGGGCTTAGGACCCCACTCCTGCGAGACGGGAGTAATCCTAAACAGGGTTTTCACCCTTCCTTTAGTTTCCTTCCTCTCCTGGAGAGGTCTTCTGCCCTAGCCCGGTCTTCGAAGCTTCCTTTGGCTATTACCCGGTGGAAACAACTGAAGCTTCAACGCCTTTTTTTCCTATCTTCTTTAGCACCGGGCTAGGGAGTAAGCCCGTGGAACCTTAGTTTTGTTCCCTCGGGGCTTACTTGTGGTTCCTGTGGTGCACTCCTGACCCTGCTGCTTTGAAAGAA	354
	3	>11-4	AAAGAAATGAGGCGAAGAAGTCCTTCAGGGATCCCCGGGGAAACCTGGAGGAAGTCCGACGAGATCGCGGCTGGGGCTTAGGACCCCACTCCTGCGAGACGGGAGTAATCCTAAACAGGGTTTTCACCCTTCCTTTAGTTTCCTTCCTCTCCTGGAGAGGTCTTCTGCCCTAGCCCGGTCTTCGAAGCTTCCTTTGGCTATTACCCGGTGGAAACAACTGAAGCTTCAACGCCTTCTTTTCCTATCTTCTTTAGCACCGGGCTAGGGAGTAAGCCCGTGGAACCTTAGTTTTGTTCCCTCGGGACTTACTTGTGGTTCCTGTGGTGCACTCCTGACCCTGCTGCTTTGAAAGAA	354
	4	>11-5	AAAGAAATGAGGCGAAGAAGTCCTTCAGGGATCCCCGGGGAAACCTGGAGGAAGTCCGACGAGATCGCGGCTGGGGCTTAGGACCCCACTCCTGCGAGACGGGAGTAATCCTAAACAGGGTTTTCACCCTTCCTTTAGTTTCCTTCCTCTCCTGGAGAGGTCTTCTGCCCTAGCCCGGTCTTCGAAGCTTCCTTTGGCTATTACCCGGTGGAAACAACTGAAGCTTCAACGCCTTTTTTTCCTATCTTCTTTAGCACCGGGCTAGGGAGTAAGCCCGTGGAACCTTAGTTCTGTTCCCTCGGGACTTACTTGTGGTTCCTGTGGTGCACTCCTGACCCTGCTGCTTTGAAAGAA	354
	5	>11-6	AAAGAAATGAGGCGAAGAAGTCCTTCAGGGATCCCCGGGGAAACCTGGAGGAAGTCCGACGAGATCGCGGCTGGGGCTTAGGACCCCACTCCTGCGAGACGGGAGTAATCCTAAACAGGGTTTTCACCCTTCCTTTAGTTTCCTTCCTCTCCTGGAGAGGCCTTCTGCCCTAGCCCGGTCTTCGAAGCTTCCTTTGGCTATTACCCGGTGGAAACAACTGAAGCCTCAACGCCTTTTTTTCCTATCTTCTTTAGCACCGGGCTAGGGAGTAAGCCCGTGGAACCTTAGTTTTGTTCCCTCGGGACTTACTTGTGGTTCCTGTGGTGCACTCCTGACCCTGCTGCTTTGAAAGAA	354
	6	>11-7	AAAGAAATGAGGCGAAGAAGTCCTTCAGGGATCCCCAGGGAAACCTGGAGGAAGTCCGACGAGATCGCGGCTGGGGCTTAGGACCCCACTCCTGCGAGACAGGAGTAATCCTAAACAGGGTTTTCACCCTTCCTTTAGTTTCCTTCCTCTCCTGGAGAGGTCTTCTGCCCTAGCCCGGTCTTCGAAGCTTCCTTTGGCTACTACCCGGTGGAAACAACTGAAGCTTCAACGCCTTTTTTTCCAATCTTCTTTAGCACCGGGCTAGGGAGTAAGCCCGTGGAACCTTAGTTTTGTTCCCTCGGGACTTACTTGTGGTTCCTGTGGTGCACTCCTGACCCTGCTGCTTTGAAAGAA	354
	7	>11-8	AAAGAAATGAGGCGAAGAAGTCCTTCAGGGATCCCCGGGGAAACCTGGAGGAAGTCCGACGAGATCGCGGCTGGGGCTTAGGACCCCACTCCTGCGAGACGGGAGTAATCCTAAACAGGGTTTTCACCCTTCCTTTAGTTTCCTTCCTCTCCTGGAGAGGTCTTCTGCCCTAGCCCGGTCTTCGAAGCTTCCTTTGGCTATTACCCGGTGGAAACAACTGAAGCTTCAACGCCTTTTTTTCCTATCTTCTTTAGCACCGGGCTAGGGAGTAAGCCCGTGGAACCTTAGTTTTGTTCCCTCGGGACTTACTTGTGGTTCCTGTGGTGCACTCCTGACCCTGCTGCTTTGAAAGAA	354
	8	>11-9	AAAGAAATGAGGCGAAGAAGTCCTTCAGGGATCCCCGGGGAAACCTGGAGGAAGTCCGACGAGATCGCGGCTGGGGCTTAGGACCCCACTCCTGCGAGACGGGAGTAATCCTAAACAGGGTTTTCACCCTTCCTTTAGTTTCCTTCCTCTCCTGGAGAGGTCTTCTGCCCTAGCCCGGTCTTCGAAGCTTCCTTTGGCTATTACCCGGTGGAAACAACTGAAGCTTCAACGCCTTTTTTTCCTATCTTCTTTAGCACCGGGCTAGGGAGTAAGCCCGTGGAACCTTAGTTTTGTTCCCTCGGGACCTACTTGTGGTTCCTGTGGTGCACTCCTGACCCTGCTGCTTTGAAAGAA	354
	9	>11-10	AAAGAAATGAGGCGAAGAAGTCCTTCAGGGATCCCCGGGGAAACCTGGAGGAAGTCCGACGAGATCGCGGCTGGGGCTTAGGACCCCACTCCTGCGAGACGGGAGTAATCCTAAACAGGGTTTTCACCCTTCCTTTAGTTTCCTTCCTCTCCTGGAGAGGTCTTCTGCCCTAGCCCGGTCTTCGAAGCTTCCTTTGGCTATTACCCGGTGGAAACAACTGAAGCTTCAACGCCTTTTTTTCCTATCTTCTTTAGCACCGGGCTAGGGAGTAAGCCCGTGGAACCTTAGTTCTGTTCCCTCGGGACTTACTTGTGGTTCCTGTGGTGCACTCCTGACCCTGCTGCTTTGAAAGAA	354
	10	>11-11	AAAGAAATGAGGCGAAGAAGTCCTTCAGGGATCCCCGGGGAAACCTGGAGGAAGTCCGACGAGATCGCGGCTGGGGCTTAGGACCCCACTCCTGCGAGACGGGAGTAATCCTAAACAGGGTTTTCACCCTTCCTTTAGTTTCCTTCCTCTCCTGGAGAGGTCTTCTGCCCTAGCCCGGTCTTCGAAGCTTCCTTTGGCTATTACCCGGTGGAAACAACTGAAGCTTCAACGCCTTTTTTTCCTATCTTCTTTAGCACCGGGCTAGGGAGTAAGCCCGTGGAACCTTAGTTTTGTTCCCTCGGGACTTACTTGTGGTTCCTGTGGTGCACTCCTGACCCTGCTGCTTTGAAAGAA	354
	11	>11-13	AAAGAAATGAGGCGAAGAAGTCCTTCAGGGATCCCCGGGGAAACCTGGAGGAAGTCCGACGAGATCGCGGCTGGGGCTTAGGACCCCACTCCTGCGAGACGGGAGTAATCCTAAACAGGGTTTTCACCCTTCCTTTAGTTTCCTTCCTCTCCTGGAGAGGTCTTCTGCCCTAGCCCGGTCTTCGAAGCTTCCTTTGGCTATTACCCGGTGGAAACAACTGAAGCTTCAACGCCTTTTTTTCCTATCTTCTTTAGCACCGGGCTAGGGAGTAAGCCCGTGGAACCTTAGTTTTGTTCCCTCGGGACTTACTTGTGGTTCCTGTGGTGCACTCCTGACCCTGCTGCTTTGAAAGAA	354
	12	>11-14	AAAGAAATGAGGCGAAGAAGTCCTTCAGGGATCCCCGGGGAAACCTGGAGGAAGTCCGACGAGATCGCGGCTGGGGCTTAGGACCCCACTCCTGCGAGACAGGAGTAATCCTAAACAGGGTTTTCACCCTTCCTTTAGTTTCCTTCCTCTCCTGGAGAGGTCTTCTGCCCTAGCCCGGTCTTCGAAGCTTCCTTTGGCTACTACCCGGTGGAAACAACTGAAGCTTCAACGCCTTTTTTTCCAATCTTCTTTAGCACCGGGCTAGGGAGTAAGCCCGTGGAACCTTAGTTTTGTTCCCTCGGGACTTACTTGTGGTTCCTGTGGTGCACTCCTGACCCTGCTGCTTTGAAAGAA	354
	13	>11-15	AAAGAAATGAGGCGAAGAAGTCCTTCAGGGATCCCCAGGGAAACCTGGAGGAAGTCCGACGAGATCGCGGCTGGGGCTTAGGACCCCACTCCTGCGGGACAGGAGTAATCCTAAACAGGGTTTTCACCCTTCCTTTAGTTTCCTTCCTCTCCTGGAGAGGTCTTCTGCCCTAGCCCGGTCTTCGAAGCTTCCTTTGGCTACTACCCGGTGGAAACAACTGAAGCTTCAACGCCTTTTTTTCCAATCTTCTTTAGCACCGGGCTAGGGAGTAAGCCCGTGGAACCTTAGTTTTGTTCCCTCGGGACTTACTTGTGGTTCCTGTGGTGCACTCCTGACCCTGCTGCTTTGAAAGAA	354
	14	>11-16	AAAGAAATGAGGCGAAGAAGTCCTTCAGGGATCCCCGGGGAAACCTGGAGGAAGTCCGACGAGATCGCGGCTGGGGCTTAGGACCCCACTCCTGCGAGACGGGAGTAATCCTAAACAGGGTTTTCACCCTTCCTTTAGTTTCCTTCCTCTCCTGGAGAGGTCTTCTGCCCTAGCCCGGTCTTCGAAGCTTCCTTTGGCTATTACCCGGTGGAAACAACTGAAGCTTCAACGCCTATTTTTCCTATCTTCTTTAGCACCGGGCTAGGGAGTGAGCCCGTGGAACCTTAGTTTTGTTCCCTCGGGACTTACTTGTGGTTCCTGTGGTGCACTCCTGACCCTGCTGCTTTGAAAGAA	354
	15	>11-17	AAAGAAATGAGGCGAAGAAGTCCTTCAGGGATCCCCGGGGAAACCTGGAGGAAGTCCGACGAGATCGCGGCTGGGGCTTAGGACCCCACTCCTGCGAGACAGGAGTAATCCTAAACAGGGTTTTCACCCTTCCTTTAGTTTCCTTCCTCTCCTGGAGAGGTCTTCTGCCCTAGCCCGGTCTTCGAAGCTTCCTTTGGCTACTACCCGGTGGAAACAACTGAAGCTTCAACGCCTTTTTTTCCAATCTTCTTTAGCACCGGGCTAGGGAGTAAGCCCGTGGAACCTTAGTTTTGTTCCCTCGGGACTTACTTGTGGTTCCTGTGGTGTACTCCTGACCCTGCTGCTTTGAAAGAA	354
	16	>11-18	AAAGAAATGAGGCGAAGAAGTCCTTCAGGGATCCCCGGGGAAACCTGGAGGAAGTCCGACGAGATCGCGGCTGGGGCTTAGGACCCCACTCCTGCGAGACTGGAGTAATCCTAAACAGGGTTTTCACCCTTCCTTTAGTTTCCTTCCTCTCCTGGAGAGGTCTTCTGCCCTAGCCCGGTCTTCGAAGCTTCCTTTGGCTATTACCCCGTGGAAACAACTGAAGCTTCAACGCCTTTTTTTCCTATCTTCTTTAGCACCGGGCTAGGGAGTAAGCCCGTGGAACCTTAGTTTTGTTCCCTCGGGACTTACTCGTGGTTCCTGTGGTGCACTCCTGACCCTGCTGCTTTGAAAGAA	354
	17	>11-19	AAAGAAATGAGGCGAAGAAGTCCTTCAGGGATCCCCGGGGAAACCTGGAGGAAGTCCGACGAGATCGCGGCTGGGGCTTAGGACCCCACTCCTGCGAGACGGGAGTAATCCTAAACAGGGTTTTCACCCTTCCTTTAGTTTCCTTCCTCTCCTGGAGAGGTCTTCTGCCCTAGCCCGGTCTTCGAAGCTTCCTTTGGCTATTACCCGGTGGAAACAACTGAAGCTTCAACGCCTTTTTTTCCTATCTTCTTTAGCACCGGGCTAGGGAGTAAGCCCGTGGAACCTTAGTTTTGTTCCCTCGGGACTTACTTGTGGTTCCTGTGGTGCACTCCTGACCCTGCTGCTTTGAAAGAA	354
	18	>11-20	AAAGAAATGAGGCGAAGAAGTCCTTCAGGGATCCCCGGGGAAACCTGGAGGGAGTCCGACGAGATCGCGGCTGGGGCTTAGGACCCCACTCCTGCGAGACGGGAGTAATCCTAAACAGGGTTTTCACCCTTCCTTTAGTTTCCTTCCTCTCCTGGAGAGGTCTTCTGCCCTAGCCCGGTCTTCGAAGCTTCCTTTGGCTATTACCCGGTGGAAACAACTGAAGCTTCAACGCCTTTTTTTCCTATCTTCTTTAGCACCGGGCTAGGGAGTGAGCCCGTGGAACCTTAGTTTTGTTCCCTCGGGACTTACTTGTGGTTCCTGTGGTGCACTCCTGACCCTGCTGCTTTGAAAGAA	354
	19	>11-21	AAAGAAATGAGGCGAAGAAGTCCTTCAGGGATCCCCGGGGAAACCTGGAGGAAGTCCGACGAGATCGCGGCTGGGGCTTAGGACCCCACTCCTGCGAGACGGGAGTAATCCTAAACAGGGTTTTCGCCCTTCCTTTATTTTCCTTCCTCTCCTGGAGAGGTCTTCTGCCCTAACCCGGTCTTCGAAGCTTCCTTTGGCTATTACCCGGAGGAAACAACTGAAGCTTCAACGCCTTTTTTTCCTATCTTCTTTAGCACCGGGCTAGGGAGTAAGCCCGTGGAACCTTAATTTTGTTCCCTCGGGACTTACTTGTGGTTCCTGTGGTGCACTCCTGACCCTGCTGCTTTGAAAGAA	354
	20	>11-22	AAAGAAATGAGGCGAAGAAGTCCTTCAGGGATCCCCGGGGAAACCTGGAGGAAGTCCGACGAGATCGCGGCTGGGGCTTAGGACCCCACTCCTGCGAGACGGGAGTAATCCTAAACAGGGTTTTCACCCTTCCTTTAGTTTCCTTCCTCTCCTGGAGAGGTCTTCTGCCCTAGCCCGGTCTTCGAAGCTTCCTTTGGCTATTACCCGGTGGAAACAACTGAAGCTTCAACGCCTTTTTTTCCTATCTTCTTTAGCACCGGGCTAGGGAGTAAGCCCGTGGAACCTTAGTTTTGTTCCCTCGGGACTTACTTGTGGTTCCTGTGGTGCACTCCTGACCCTGCTGCTTTGAAAGAA	354
	21	>11-23	AAAGAAATGAGGCGAAGAAGTCCTTCAGGGATCCCCGGGGAAACCTGGAGGAAGTCCGACGAGATCGCGGCTGGGGCTTAGGACCCCACTCCTGCGAGACGGGAGTAATCCTAAACAGGGTTTTCACCCTTCCTTTAGTTTCCTTCCTCTCCTGGAGAGGTCTTCTGCCCTAGCCCGGTCTTCGAAGCTTCCTTTGGCTATTACCCGGTGGAAACAACTGAAGCTTCAACGCCTTTTTTTCCTATCTTCTTTAGCACCGGGCTAGGGAGTAAGCCCGTGGAACCTTAGTTTTGTTCCCTCGGGACTTACTTGTGGTTCCTGTGGTGCACTCCTGACCCTGCTGCTTTGAAAGAA	354
	22	>11-24	AAAGAAATGAGGCGAAGAAGTCCTTCAGGGATCCCCGGGGAAACCTGGAGGAAGTCCGACGAGATCGCGGCTGGGGCTTAGGACCCCACTCCTGCGAGACGGGAGTAATCCTAAACAGGGTTTTCACCCTTCCTTTAGTTTCCTTCCTCTCCTGGAGAGGTCTTCTGCCCTAGCCCGGTCTTCGAAGCTTCCTTTGGCTATTACCCGGTGGAAACAACTGAAGCTTCAACGCCTTTTTTTCCTATCTTCTTTAGCACCGGGCTAGGGAGTAAGCCCGTGGAACCTTAGTTTTGTTCCCTCGGGACTTACTTGTGGTTCCTGTGGTGCACTCCTGACCCTGCTGCTTTGAAAGAA	354
	23	>11-25	AAAGAAATGAGGCGAAGAAGTCCTTCAGGGATCCCCGGGGAAACCTGGAGGAAGTCCGACGAGATCGCGGCTGGGGCTTAGGACCCCACTCCTGCGAGACGGGAGTAATCCTAAACAGGGTTTTCACCCTTCCTTTAGTTTCCTTCCTCTCCCGGAGAGGTCTTCTGCCCTAGCCCGGTCTTCGAAGCTTCCTTTGGCTATTACCCGGTGGAAACAACTGAGGCTTCAACGCCTTTTTTTCCTATCTTCTTTAGCACCGGGCTAGGGAGTAAGCCCGTGGAACCTTAGTTTTGTTCCCTCGGGACTTACTTGTGGTTCCTGTGGTGCACTCCTGACCCTGCTGCTTTGAAAGAA	354
11. Isokuk	1	>16-3	AAAGAAATGAGGCGAAGAAGTCCTTCAGGGATCCCCGGGGAAACCTGGAGGAAGTCCGACGAGATCGCGGCTGGGGCTTAGGACCCCACTCCTGCGAGACAGGAGTAATCCTAAACAGGGTTTTCACCCTTCCTTTAGTTTCCTTCCTCTCCTGGAGAGGTCTTCTGCCCTAGCCCGGTCTTCGAAGCTTCCTTTGGCTACTACCCGGTGGAAACAACTGAAGCTTCAACGCCTTTTTTTCCTATCTTCTTTAGCACCGGGCTAGGGAGTAAGCCCGTGGAACCTTAGTTTTGTTCCCTCGGGACTTACTTGTGGTTCCTGTGGTGCACTCCTGACCCTGCTGCTTTGAAAGAA	354
	2	>16-4	AAAGAAATGAGGCGAAGAAGTCCTTCAGGGATCCCCGGGGAAACCTGGAGGAAGTCCGACGAGATCGCGGCTGGGGCTTAGGACCCCACTCCTGCGAGACAGGAGTAATCCTAAACAGGGTTTTCACCCTTCCTTTAGTTTCCTTCCTCTCCTGGAGAGGTCTTCTGCCCTAGCCCGGTCTTCGAAGCTTCCTTTGGCTACTACCCGGTGGAAACAACTGAAGCTTCAACGCCTTTTTTTCCAATCTTCTCTAGCACCGGGCTAGGGAGTAAGCCCGTGGAACCTTAGTTTTGTTCCCTCGGGACTTACTTGTGGTTCCTGTGGTGCACTCCTGACCCTGCTGCTTTGAAAGAA	354
	3	>16-10	AAAGAAATGAGGCGAAGAAGTCCTTCAGGGATCCCCGGGGAAACCTGGAGGAAGTCCGACGAGATCGCGGCTGGGGCTTAGGACCCCACTCCTGCGAGACAGGAGTAATCCTAAACAGGGTTTTCACCCTTCCTTTAGTTTCCTTCCTCTCCTGGAGAGGTCTTCTGCCCTAGCCCGGTCTTCGAAGCTTCCTTTGGCTACTACCCGGTGGAAACAACTGAAGCTTCAACGCCTTTTTTTCCTATCTTCTTTAGCACCGGGCTAGGGAGTAAGCCCGTGGAACCTTAGTTTTGTTCCCTCGGGACTTACTTGTGGTTCCTGTGGTGCACTCCTGACCCTGCTGCTTTGAAAGAA	354
	4	>16-11	AAAGAAATGAGGCGAAGAAGTCCTTCAGGGATCCCCGGGGAAACCTGGAGGAAGTCCGACGAGATCGCGGCTGGGGCTTAGGACCCCACTCCTGCGAGACAGGAGTAATCCTAAACAGGGTTTTCACCCTTCCTTTAGTTTCCTTCCTCTCCTGGAGAGGCCTTCTGCCCTAGCCCGGTCTTCGAAGCTTCCTTTGGCTACTACCCGGTGGAAACAACTGAAGCTTCAACGCCTTTTTTTCCAATCTTCTCTAGCACCGGGCTAGGGAGTAAGCCCGTGGAACCTTAGTTTTGTTCCCTCGGGACTTACTTGTGGTTCCTGTGGTGCACTCCTGACCCTGCTGCTTTGAAAGAA	354
	5	>16-12	AAAGAAATGAGGCGAAGAAGTCCTTCAGGGATCCCCGGGGAAACCTGGAGGAAGTCCGACGAGATCGCGGCTGGGGCTTAGGACCCCACTCCTGCGGGACAGGAGTAATCCTAAACAGGGTTTTCACCCTTCCTTTAGTTTCCTTCCTCTCCTGGAGAGGTCTTCTGCCCTAGCCCGGTCTTCGAAGCTTCCTTTGGCTACTACCCGGTGGAAACAACTGAAGCTTCAACGCCTTTTTTTCCAATCTTCTTTAGCACCGGGCTAGGGAGTAAGCCCGTGGAACCTTAGTTTTGTTCCCTCGGGACTTACTTGTGGTTCCTGTGGTGCACTCCTGACCCTGCTGCTTTGAAAGAA	354
	6	>16-16	AAAGAAATGAGGCGAAGAAGTCCTTCAGGGATCCCCGGGGAAACCTGGAGGAAGTCCGACGAGATCGCGGCTGGGGCTTAGGACCCCACTCCTGCGAGACGGGAGTAATCCTAAACAGGGTTTTCACCCTTCCTTTAGTTTCCTTCCTCTCCTGGAGAGGTCTTCTGCCCTAGCCCGGTCTTCGAAGCTTCCTTTGGCTATTACCCGGTGGAAACAACTGAAGCTTCAACGCCTTTTTTTCCTATCTTCTTTAGCACCGGGCTAGGGAGTAAGCCCGTGGAACCTTAGTTTTGTTCCCTCGGGACTTACTTGTGGTTCCTGTGGTGCACTCCTGACCCTGCTGCTTTGAAAGAA	354
	7	>16-25	AAAGAAATGAGGCGAAGAAGTCCTTCAGGGATCCCCGGGGAAACCTGGAGGAAGTCCGACGAGATCGCGGCTGGGGCTTAGGACCCCACTCCTGCGAGACAGGAGTAATCCTAAACAGGGTTTTCACCCTTCCTTTAGTTTCCTTCCTCTCCTGGAGAGGTCTTCTGCCCTAGCCCGGTCTTCGAAGCTTCCTTTGGCTACTACCCGGTGGAAACAACTGAAGCTTCAACGCCTTTTTTTCCAATCTTCTCTAGCACCGGGCTAGGGAGTAAGCCCGTGGAACCTTAGTTTTGTTCCCTCGGGACTTACTTGTGGTTCCTGTGGTGCACTCCTGACCCTGCTGCTTTGAAAGAA	354
	8	>16-37	AAAGAAATGAGGCGAAGAAGTCCTTCAGGGATCCCCGGGGAAACCTGGAGGAAGTCCGACGAGATCGCGGCTGGGGCTTAGGACCCCACTCCTGCGAGACAGGAGTAATCCTAAACAGGGTTTTCACCCTTCCTTTAGTTTCCTTCCTCTCCTGGAGAGGTCTTCTGCCCTAGCCCGGTCTTCGAAGCTTCCTTTGGCTACTACCCGGTGGAAACAACTGAAGCTTCAACGCCTTTTTTTCCTATCTTCTTTAGCACCGGGCTAGGGAGTAAGCCCGTGGAACCTTAGTTTTGTTCCCTCAGGACTTACTTGTGGTTCCTGTGGTGCACTCCTGACCCTGCTGCTTTGAAAGAA	354
	9	>16-38	AAAGAAATGAGGCGAAGAAGTCCTTCAGGGATCCCCGGGGAAACCTGGAGGAAGTCCGACGAGATCGCGGCTGGGGCTTAGGACCCCACTCCTGCGAGACAGGAGTAATCCTAAACAGGGTTTTCACCCTTCCTTTAGTTTCCTTCCTCTCCTGGAGAGGTCTTCTGCCCTAGCCCGGTCTTCGAAGCTTCCTTTGGCTACTACCCGGTGGAAACAACTGAAGCTTCAACGCCTTTTTTTCCAATCTTCTCTAGCACCGGGCTAGGGAGTAAGCCCGTGGAACCTTAGTTTTGTTCCCTCGGGACTTACTTGTGGTTCCTGTGGTGCACTCCTGACCCTGCTGCTTTGAAAGAA	354
	10	>16-40	AAAGAAATGAGGCGAAGAAGTCCTTCAGGGATCCCCGGGGAAACCTGGAGGAAGTCCGACGAGATCGCGGCTGGGGCTTAGGACCCCACTCCTGCGAGACAGGAGTAATCCTAAACAGGGTTTTCACCCTTCCTTTAGTTTCCTTCCTCTCCTGGAGAGGTCTTCTGCCCTAGCCCGGTCTTCGAAGCTTCCTTTGGCTACTACCCGGTGGAAACAACTGAAGCTTCAACGCCTTTTTTTCCTATCTTCTTTAGCACCGGGCTAGGGAGTAAGCCCGTGGAACCTTAGTTTTGTTCCCTCGGGACTTACTTGTGGTTCCTGTGGTGCACTCCTGACCCTGCTGCTTTGAAAGAA	354
	11	>16-44	AAAGAAATGAGGCGAAGAAGTCCTTCAGGGATCCCCGGGGAAACCTGGAGGAAGTCTGACGAGATCGCGGCTGGGGCTTAGGACCCCACTCCTGCGAGACAGGAGTAATCCTAAACAGGGTTTCCACCCTTCCTTTAGTTTCCTTCCTCTCCTGGAGAGGTCTTCTGCCCTAGCCCGGTCTTCGAAGCTTCCTTTGGCTACTGCCCGGTGGAAACAACTGAAGCTTCAACGCCTTTTTTTCCAATCTTCTCTAGCACCGGGCTAGGGAGTAAGCCCGTGGAACCTTAGTTTTGTTCCCTCGGGACTTACTTGTGGTTCCTGTGGTGCACTCCTGACCCTGCTGCTTTGAAAGAA	354
	12	>16-54	AAAGAAATGAGGCGAAGAAGTCCTTCAGGGATCCCCGGGGAAACCTGGAGGAAGTCCGACGAGATCGCGGCTGGGGCTTAGGACCCCACTCCTGCGAGACAGGAGTAATCCTAAACAGGGTTTTCGCCCTTCCTTTAGTTTCCTTCCTCTCCTGGAGAGGTCTTCTGCCCTAGCCCGGTCTTCGAAGCTTCCTTTGGCTACTACCCGGTGGAAACAACTGAAGCTTCAACGCCTTTTTTTCCTATCTTCTTTAGCACCGGGCTAGGGAGTAAGCCCGTGGAACCTTAGTTTTGTTCCCTCGGGACTTACTTGTGGTTCCTGTGGTGCACTCCTGACCCTGCTGCTTTGAAAGAA	354
	13	>16-56	AAAGAAATGAGGCGAAGAAGTCCTTCAGGGATCCCCGGGGAAACCTGGAGGAAGTCCGACGAGATCGCGGCTGGGGCTTAGGACCCCACTCCTGCGAGACAGGAGTAATCCTAAACAGGGTTTTCACCCTTCCTTTAGTTTCCTTCCTCTCCTGGAGAGGTCTTCTGCCCTAGCCCGGTCTTCGAAGCTTCCTTTGGCTACTACCCGGTGGAAACAACTGAAGCTTCAACGCCTTTTTTTCCAATCTTCTTTAGCACCGGGCTAGGGAGTAAGCCCGTGGAACCTTAGTTTTGTTCCCTCGGGACTTACTTGTGGTTCCTGTGGTGCACTCCTGACCCTGCTGCTTTGAAAGAA	354
	14	>16-68	AAAGAAATGAGGCGAAGAAGTCCTTCAGGGATCTCCGGGGAAACCTGGAGGAAGTCCGACGAGATCGCGGCTGGGGCTTAGGACCCCACTCCTGCGAGACAGGAGTAATCCTAAACAGGGTTTTCACCCTTCCTTTAGTTTCCTTCCTCTCCTGGAGAGGTCTTCTGCCCTAGCCCGGTCTTCGAAGCTTCCTTTGGCTACTACCCGGTGGAAACAACTGAAGCTTCAACGCCTTTTTTTCCAATCTTCTCTAGCACCGGGCTAGGGAGTAAGCCCGTGGAACCTTAGTTTTGTTCCCTCGGGACTTACTTGTGGTTCCTGTGGTGCACTCCTGACCCTGCTGCTTTGAAAGAA	354
	15	>16-69	AAAGAAATGAGGCGAAGAAGTCCTTCAGGGATCCCCGGGGAAACCTGGAGGAAGTCCGACGAGATCGCGGCTGGGGCTTAGGACCCCACTCCTGCGAGACAGGGGTAATCCTAAACAGGGCTTTCACCCTTCCTTTAGTTTCCTTCCTCTCCTGGAGAGGTCTTCTGCCCTAGCCCGGTCTTCGAAGCTTCCTTTGGCTACTACCCGGTGGAAACAACTGAAGCTTCAACGCCTTTTTTTCCAATCTTCTTTAGCACCGGGCTAGGGAGTAAGCCCGTGGAACCTTAGTTTTGTTCCCTCGGGACTTACTTGTGGTTCCTGTGGTGCACTCCTGACCCTGCTGCTTTGAAAGAA	354
	16	>16-77	AAAGAAATGAGGCGAAGAAGTCCTTCAGGGATCCCCGGGGAAACCTGGAGGAAGTCCGACGAGATCGCGGCTGGGGCTTAGGACCCCACTCCTGCGAGACAGGAGTAATCCTAAACAGGGTTTTCACCCTTCCTTTAGTTTCCTTCCTCTCCTGGAGAGGTCTTCTGCCCTAGCCCGGTCTTCGAAGCTTCCTTTGGCTACTACCCGGTGGAAACAACTGAAGCTTCAACGCCTTTTTTTCCAATCTTCTCTAGCACCGGGCTAGGGAGTAAGCCCGTGGAACCTTAGTTTTGTTCCCTCGGGACTTACTTGTGGTTCCTGTGGTGCACTCCTGACCCTGCTGCTTTGAAAGAA	354
	17	>16-89	AAAGAAATGAGGCGAAGAAGTCCTTCAGGGATCCCCGGGGAAACCTGGAGGAAGTCCGACGAGATCGCGGCTGGGGCTTAGGACCCCACTCCTGCGAGACAGGAGTAATCCTAAACAGGGTTTTCACCCTTCCTTTAGTTTCCTTCCTCTCCTGGAGAGGTCTTCTGCCCTAGCCCGGTCTTCGAAGCTTCCTTTGGCTACTACCCGGTGGAAACAACTGAAGCTTCAACGCCTTTTTTTCCAATCTTCTCTAGCACCGGGCTAGGGAGTAAGCCCGTGGAACCTTAGTTTTGTTCCCTCGGGACTTACTTGTGGTTCCTGTGGTGCACTCCTGACCCTGCTGCTTTGAAAGAA	354
	18	>16-90	AAAGAAATGAGGCGAAGAAGTCCTTCAGGGATCCCCGGGGAAACCTGGAGGAAGTCCGACGAGATCGCGGCTGGGGCTTAGGACCCCACTCCTGCGAGACAGGAGTAATCCTAAACAGGGTTTTCACCCTTCCTTTAGTTTCCTTCCTCTCCTGGAGAGGTCTTCTGCCCTAGCCCGGTCTTCGAAGCTTCCTTTGGCTACTACCCGGTGGAAACAACTGAAGCTTCAACGCCTTTTTTTCCTATCTTCTTTAGCACCGGGCTAGGGAGTAAGCCCGTGGAACCTTAGTTTTGTTCCCTCGGGACTTACTTGTGGTTCCTGTGGTGCACTCCTGACCCTGCTGCTTTGAAAGAA	354
	19	>16-93	AAAGAAATGAGGCGAAGAAGTCCTTCAGGGATCCCCGGAGAAACCTGGAGGAAGTCCGACGAGATCGCGGCTGGGGCTTAGGACCCCACTCCTGCGAGACGGGAGTAATCCTAAACAGGGTTTTCACCCTTCCTTTAGTTTCCTTCCTCTCCTGGAGAGGTCTTCTGCCCTAGCCCGGTCTTCGAAGCTTCCTTTGGCTATTACCCGGTGGAAACAACTGAAGCTTCAACGCCTTTTTTTCCTATCTTCTTTAGCACCGGGCTAGGGAGTAAGCCCGTGGAACCTTAGTTTTGTTCCCTCGGGACTTACTTGTGGTTCCTGTGGTGCACTCCTGACCCTGCTGCTTTGAAAGAA	354
	20	>16-95	AAAGAAATGAGGCGAAGAAGTCCTTCAGGGATCCCCGGGGAAACCTGGAGGAAGTCCGACGAGATCGCGGCTGGGGCTTAGGACCCCACCCCTGCGAGACAGGAGTAATCCTAAACAGGGTTTTCACCCTTCCTTTAGTTTCCTTCCTCTCCTGGAGAGGTCTTCTGCCCTAGCCCGGTCTTCGAAGCTTCCTTTGGCTACTACCCGGTGGAAACAACTGAAGCTTCAACGCCTTTTTTTCCAATCTTCTCTAGCACCGGGCTAGGGAGTAAGCCCGTGGAACCTTAGTTTTGTTCCCTCGGGACTTACTTGTGGTTCCTGTGGTGCACTCCTGACCCTGCTGCTTTGAAAGAA	354
	21	>16-97	AAAGAAATGAGGCGAAGAAGTCCTTCAGGGATCCCCGGGGAAACCTGGAGGAAGTCCGACGAGATCGCGGCTGGGGCTTAGGACCCCACTCCTGCGAGACAGGAGTAATCCTAAACAGGGTTTTCACCCTTCCTTTAGTTTCCTTCCTCTCCTGGAGAGGTCTTCTGCCCTAGCCCGGTCTTCGAAGCTTCCTTTGGCTACTACCCGGTGGAAACAACTGAAGCTTCAACGCCTTTTTTTCCAATCTTCTCTAGCACCGGGCTAGGGAGTAAGCCCGTGGAACCTTAGTTTTGTTCCCTCGGGACTTACTTGTGGTTCCTGTGGTGCACTCCTGACCCTGCTGCTTTGAAAGAA	354
	22	>16-109	AAAGAAATGAGGCGAAGAAGTCCTTCAGGGATCCCCGGGGAAACCTGGAGGAAGTCCGACGAGATCGCGGCTGGGGCTTAGGACCCCACTCCTGCGAGACAGGAGTAATCCTAAACAGGGTTTTCACCCTTCCTTTAGTTTCCTTCCTCTCCTGGAGAGGTCTTCTGCCCTAGCCCGGTCTTCGAAGCTTCCTTTGGCTACTACCCGGTGGAAACAACTGAAGCTTCAACGCCTTTTTTTCCTATCTTCTTTAGCACCGGGCTAGGGAGTAAGCCCGTGGAACCTTAGTTTTGTTCCCTCGGGACTTACTTGTGGTTCCTGTGGTGCACTCCTGACCCTGCTGCTTTGAAAGAA	354
	23	>16-110	AAAGAAATGAGGCGAAGAAGTCCTTCAGGGATCCCCGGGGAAACCTGGAGGAAGTCCGACGAGATCGCGGCTGGGGCTTAGGACCCCACTCCTGCGAGACAGGAGTAATCCTAAACAGGGTTTTCACCCTTCCTTTAGTTTCCTTCCTTTCCTGGAGAGGTCTTCTGCCCTAGCCCGGTCTTCGAAGCTTCCTTTGGCTACTACCCGGTGGAAACAACTGAAGCTTCAACGCCTTTTTTTCCAATCTTCTCTAGCACCGGGCTAGGGAGTAAGCCCGTGGAACCTTAGTTTTGTTCCCTCGGGACTTACTTGTGGTTCCTGTGGTGCACTCCTGACCCTGCTGCTTTGAAAGAA	354
12. Shinma_Jeju	1	>18-6	AAAGAAATGAGGCGAAGAAGTCCTTCAGGGATCCCCGGGGAAACCTGGAGGAAGTCCGACGAGATCGCGGCTGGGGCTTAGGACCCCACTCCTGCGAGACGGGAGTAATCCTAAACAGGGTTTTCACCCTTCCTTTAGTTTCCTTCCTCTCCTGGAGAGGTCTTCTGCCCTAGCCCGGTCTTCGAAGCTTCCTTTGGCTATTACCCGGTGGAAACAACTGAAGCTTCAACGCCTTTTTTTCCTATCTTCTTTAGCACCGGGCTAGGGAGTAAGCCCGTGGAACCTTAGTTCTGTTCCCTCGGGACTTACTTGTGGTTCCTGTGGTGCACTCCTGACCCTGCTGCTTTGAAAGAA	354
	2	>18-10	AAAGAAATGAGGCGAAGAAGTCCTTCAGGGATCCCCGGGGAAACCTGGAGGAAGTCCGACGAGATCGCGGCTGGGGCTTAGGACCCCACTCCTGCGAGACAGGAGTAATCCTAAACAGGGTTTTCACCCTTCCTTTAGTTTCCTTCCTCTCCTGGAGAGGTCTTCTGCCCTAGCCCGGTCTTCGAAGCTTCCTTTGGCTACTACCCGGTGGAAACAACTGAAGCTTCAACGCCTTTTTTTCCTATCTTCTTTAGCACCGGGCTAGGGAGTAAGCCCGTGGAACCTTAGTTTTGTTCCCTCGGGACTTACTTGTGGTTCCTGTGGTGCACTCCTGACCCTGCTGCTTTGAAAGAA	354
	3	>18-11	AAAGAAATGAGGCGAAGAAGTCCTTCAGGGATCCCCGGGGAAACCTGGAGGAAGTCCGACGAGATCGCGGCTGGGGCTTAGGACCCCACTCCTGCGAGACAGGAGTAATCCTAAACAGGGTTTTCACCCTTCCTTTAGTTTCCTTCCTCTCCTGGAGAGGTCTTCTGCCCTAGCCCGGTCTTCGAAGCTTCCTTTGGCTACTACCCGGTGGAAACAACTGAAGCTTCAACGCCTTTTTTTCCAATCTTCTTTAGCACCGGGCTAGGGAGTAAGCCCGTGGAACCTTAGTTTTGTTCCCTCGGGACTTACTTGTGGTTCCTGTGGTGCACTCCTGACCCTGCTGCTTTGAAAGAA	354
	4	>18-13	AAAGAAATGAGGCGAAGAAGTCCTTCAGGGATCCCCGGGGAAACCTGGAGGAAGTCCGACGAGATCGCGGCTGGGGCTTAGGACCCCACTCCTGCGAGACAGGAGTAATCCTAAACAGGGTTTTCGCCCTTCCTTTAGTTTCCTTCCTCTCCTGGAGAGGTCTTCTGCCCTAGCCCGGTCTTCGAAGCTTCCTTTGGCTACTACCCGGTGGAAACAACTGAAGCTTCAGCGCCTTTTTTTCCTATCTTCTTTAGCACCGGGCTAGGGAGTAAGCCCGTGGAACCTTAGTTTTGTTCCCTCGGGACTTACTTGTGGTTCCTGTGGTGCACTCCTGACCCTGCTGCTTTGAAAGAA	354
	5	>18-24	AAAGAAATGAGGCGAAGAAGTCCTTCAGGGATCCCCGGGGAAACCTGGAGGAAGTCCGACGAGATCGCGGCTGGGGCTTAGGACCCCACTCCTGCGAGACAGGAGTAATCCTAAACAGGGTTTTCACCCTTCCTTTAGTTTCCTTCCTCTCCTGGAGAGGTCTTCTGCCCTAGCCCGGTCTTCGAAGCTTCCTTTGGCTACTACCCGGTGGAAACAACTGAAGCTTCAACGCCTTTTTTTCCTATCTTCTTTAGCACCGGGCTAGGGAGTAAGCCCGTGGAACCTTAGTTTTGTTCCCTCGGGACTTACTTGTGGTTCCTGTGGTGCACTCCTGACCCTGCTGCTTTGAAAGAA	354
	6	>18-25	AAAGAAATGAGGCGAAGAAGTCCTTCAGGGATCCCCGGGGAAACCTGGAGGAAGTCCGACGAGATCGCGGCTGGGGCTTAGGACCCCACTCCTGCGAGACAGGAGTAATCCTAAACAGGGTTTTCACCCTTCCTTTAGTTTCCTTCCTCTCCTGGAGAGGTCTTCTGCCCTAGCCCGGTCTTCGAAGCTTCCTTTGGCTACTACCCGGTGGAAACAACTGAAGCTTCAACGCCTTTTTTTCCAATCTTCTTTAGCACCGGGCTAGGGAGTAAGCCCGTGGAACCTTAGTTTTGTTCCCTCGGGACTTACTTGTGGTTCCTGTGGTGTACTCCTGACCCTGCTGCTTTGAAAGAA	354
	7	>18-28	AAAGAAATGAGGCGAAGAAGTCCTTCAGGGATCCCCGGGGAAACCTGGAGGAAGTCCGACGAGATCGCGGCTGGGGCTTAGGACCCCACTCCTGCGAGACGGGAGTAATCCTAAACAGGGTTTTCACCCTTCCTTTAGTTTCCTTCCTCTCCTGGAGAGGTCTTCTGCCCTAGCCCGGTCTTCGAAGCTTCCTTTGGCTATTACCCGGTGGAAACAACTGAAGCTTCAACGCCTTTTTTTCCTATCTTCTTTAGCACCGGGCTAGGGAGTAAGCCCGTGGAACCTTAGTTTTGTTCCCTCGGGACTTACTTGTGGTTCCTGTGGTGCACTCCTGACCCTGCTGCTTTGAAAGAA	354
	8	>18-29	AAAGAAATGAGGCGAAGAAGTCCTTCAGGGATCCCCGGGGAAGCCTGGAGGAAGTCCGACGAGATCGCGGCTGGGGCTTAGGACCCCACTCCTGCGAGACAGGAGTAATCCTAAACAGGGTTTTCACCCTTCCTTTAGTTTCCTTCCTCTCCTGGAGAGGTCTTCTGCCCTAGCCCGGTCTTCGAAGTTTCCTTTGGCTACTACCCGGTGGAAACAACTGAAGCTTCAACGCCTTTTTTTCCTATCTTCTTTAGCACCGGGCTAGGGAGTAAGCCCGTGGAACCTTAGTTTTGTTCCCTCGGGACTTACTTGTGGTTCCTGTGGTGCACTCCTGACCCTGCTGCTTTGAAAGAA	354
	9	>18-30	AAAGAAATGAGGCGAAGAAGTCCTTCAGGGATCCCCGGGGAAACCTGGAGGAAGTCCGACGAGATCGCGGCTGGGGCTTAGGACCCCACTCCTGCGAGACAGGAGTAATCCTAAACAGGGTTTTCACCCTTCCTTTAGTTTCCTTCCTCTCCTGGAGAGGTCTTCTGCCCTAGCCCGGTCTTCGAAGCTTCCTTTGGCTACTACCCAGTGGAAACAACTGAAGCTTCAACGCCTTTTTTTCCAATCTTCTTTAGCACCGGGCTAGGGAGTAAGCCCGTGGAACCTTAGTTTTGTTCCCTCGGGACTTACTTGTGGTTCCTGTGGTGCACTCCTGACCCTGCTGCTTTGAAAGAA	354
	10	>18-31	AAAGAAATGAGGCGAAGAAGTCCTTCAGGGATCCCCGGGGAAACCTGGAGGAAGTCCGACGAGATCGCGGCTGGGGCTTAGGACCCCACTCCTGCGAGACAGGAGTAATCCTAAACAGGGTTTTCACCCTTCCTTTAGTTTCCTTCCTCTCCTGGAGGGGTCTTCTGCCCTAGCCCGGTCTTCGAAGCTTCCTTTGGCTACTACCCGGTGGAAACAACTGAAGCTTCAACGCCTTTTTTTCCAATCTTCTCTAGCACCGGGCTAGGGAGTAAGCCCGTGGAACCTTAGTTTTGTTCCCTCGGGACTTACCTGTGGTTCCTGCGGTGCACTCCTGACCCTGCTGCTTTGAAAGAA	354
	11	>18-33	AAAGAAATGAGGCGAAGAAGTCCTTCAGGGATCCCCGGGGAAACCTGGAGGAAGTCCGACGAGATCGCGGCTGGGGCTTAGGACCCCACTCCTGCGAGACAGGAGTAATCCTAAACAGGGTTTTCACCCTTCCTTTAGTTTCCTTCCTCTCCTGGAGAGGTCTTCTGCCCTAGCCCGGTCTTCGAAGCTTCCTTTGGCTACTACCCGGTGGAAACAACTGAAGCTTCAACGCCTTTTTTTCCTATCTTCTTTAGCACCGGGCTAGGGAGTAAGCCCGTGGAACCTTAGTTTTGTTCCCTCGGGACTTACTTGTGGTTCCTGTGGTGCACTCCTGACCCTGCTGCTTTGAAAGAA	354
	12	>18-36	AAAGAAATGAGGCGAAGAAGTCCTTCAGGGATCCCCGGGGAAACCTGGAGGAAGTCCGACGAGATCGCGGCTGGGGCTTAGGACCCCACTCCTGCGAGACAGGAGTAATCCTAAACAGGGCTTTCACCCTTCCTTTAGTTTCCTTCCTCTCCTGGAGAGGTCTTCTGCCCTAGCCCGGTCTTCGAAGCTTCCTTTGGCTACTACCCGGTGGAAACAACTGAAGCTTCAACGCCTTTTTTTCCAATCTTCTTTAGCACCGGGCTAGGGAGTAAGCCCGTGGAACCTTAGTTTTGTTCCCTCGGGACTTACTTGTGGTTCCTGTGGTGCACTCCTGACCCTGCTGCTTTGAAAGAA	354
	13	>18-37	AAAGAAATGAGGCGAAGAAGTCCTTCAGGGATCCCCGGGGAAACCTGGAGGAAGTCCGACGAGATCGCGGCTGGGGCTTAGGACCCCACTCCTGCGAGACGGGAGTAATCCTAAACAGGGTTTTCACCCTTCCTTTAGTTTCCTTCCTCTCCTGGAGAGGTCTTCTGCCCTAGCCCGGTCTTCGAAGCTTCCTTTGGCTATTACCCGGTGGAAACAACTGAAGCTTCAACGCCTTTTTTTCCTATCTTCTTTAGCACCGGGCTAGGGAGTAAGCCCGTGGAACCTTAGTTTTGTTCCCTCGGGACTTACTTGTGGTTCCTGTGGTGCACTCCTGACCCTGCTGCTTTGAAAGAA	354
	14	>18-39	AAAGAAATGAGGCGAAGAAGTCCTTCAGGGATCCCCGGGGAAACCTGGAGGAAGTCCGACGAGATCGCGGCTGGGGCTTAGGACCCCACTCCTGCGAGACGGGAGTAATCCTAAACAGGGTTTTCACCCTTCCTTTAGTTTCCTTCCTCTCCTGGAGAGGTCTTCTGCCCTAGCCCGGTCTTCGAAGCTTCCTTTGGCTATTACCCGGTGGAAACAACTGAAGCTTCAACGCCTTTTTTTCCTATCTTCTTTAGCACCGGGCTAGGGAGTAAGCCCGTGGAACCTTAGTTTTGTTCCCTCGGGACTTACTTGTGGTTCCTGTGGTGCACTCCTGACCCTGCTGCTTTGAAAGAA	354
	15	>18-40	AAAGAAATGAGGCGAAGAAGTCCTTCAGGGATCCCCGGGGAAACCTGGAGGAAGTCCGACGAGATCGCGGCTGGGGCTTAGGACCCCACTCCTGCGAGACAGGAGTAATCCTAAACAGGGTTTTCACCCTTCCTTTAGTTTCCTTCCTCTCCTGGAGAGGTCTTCTGCCCTAGCCCGGTCTTCGAAGCTTCCTTTGGCTACTACCCGGCGGAAACAACTGAAGCTTCAACGCCTTTTTTTCCAATCTTCTTTAGCACCGGGCTAGGGAGTAAGCCCGTGGAACCTTAGTTTTGTTCCCTCGGGACTTACTTGTGGTTCCTGTGGTGCACTCCTGACCCTGCTGCTTTGAAAGAA	354
	16	>18-42	AAAGAAATGAGGCGAAGAAGTCCTTCAGGGATCCCCGGGGAAACCTGGAGGAAGTCCGACGAGATCGCGGCTGGGGCTTAGGACCCCACTCCTGCGAGACAGGAGTAATCCTAAACAGGGTTTTCACCCTTCCTTTAGTTTCCTTCCTCTCCTGGAGAGGTCTTCTGCCCTAGCCCGGTCTTCGAAGCTTCCTTTGGCTACTACCCGGTGGAAACAACTGAAGCTTCAACGCCTTTTTTTCCAATCTTCTCTAGCACCGGGCTAGGGAGTAAGCCCGTGGAACCTTAGTTTTGTTCCCTCGGGACTTACTTGTGGTTCCTGTGGTGCACTCCTGACCCTGCTGCTTTGAAAGAA	354
	17	>18-46	AAAGAAATGAGGCGAAGAAGTCCTTCAGGGATCCCCGGGGAAACCTGGAGGAAGTCCGACGAGATCGCGGCTGGGGCTTAGGACCCCACTCCTGCGAGACAGGAGTAATCCTAAACAGGGTTTTCACCCTTCCTTTAGTTTCCTTCCTCTCCTGGAGAGGTCTTCTGCCCTAGCCCGGTCTTCGAAGCTTCCTTTGGCTACTACCCGGTGGAAACAACTGAAGCTTCAACGCCTCTTTTTCCAATCTTCTCTAGCACCGGGCTAGGGAGTAAGCCCGTGGAACCTTAGTTTTGTTCCCTCGGGACTTACTTGTGGTTCCTGTGGTGCACTCCTGACCCTGCTGCTTTGAAAGAA	354
	18	>18-48	AAAGAAATGAGGCGAAGAAGTCCTTCAGGGATCCCCGGGGAAACCTGGAGGAAGTCCGACGAGATCGCGGCTGGGGCTTAGGACCCCACTCCTGCGAGACAGGAGTAATCCTAAACAGGGTTTTCACCCTTCCTTTAGTTTCCTTCCTCTCCTGGAGAGGTCTTCTGCCCTAGCCCGGTCTTCGAAGCTTCCTTTGGCTACTACCCGGTGGAAACAACTGAAGCTTCAACGCCTTTTTTTCCAATCTTCTCTAGCACCGGGCTAGGGAGTAAGCCCGTGGAACCTTAGTTTTGTTCCCTCGGGACTTACTTGTGGTTCCTGTGGTGCACTCCTGACCCTGCTGCTTTGAAAGAA	354
	19	>18-51	AAAGAAATGAGGCGAAGAAGTCCTTCAGGGATCCCCGGGGAAACCTGGAGGAAGTCCGACGAGATCGCGGCTGGGGCTTAGGACCCCACTCCTGCGAGACAGGGGTAATCCTAAACAGGGTTTTCACCCTTCCTTTAGTTTCCTTCCTCTCCTGGAGAGGTCTTCTGCCCTAGCCCGGTCTTCGAAGCTTCCTTTGGCTACTACCCGGTGGAAACAACTGAAGCTTCAACGCCTTTTTTTCCAATCTTCTTTAGCACCGGGCTAGGGAGTAAGCCCGTGGAACCTTAGTTTTGTTCCCTCGGGACTTACTTGTGGTTCCTGTGGTGCACTCCTGACCCTGCTGCTTTGAAAGAA	354
	20	>18-55	AAAGAAATGAGGCGAAGAAGTCCTTCAGGGATCCCCGGGGAAACCTGGAGGAAGTCCGACGAGATCGCGGCTGGGGCTTAGGACCCCACTCCTGCGAGACAGGAGTAATCCTAAACAGGGTTTTCACCCTTCCTTTAGTTTCCTTCCTCTCCTGGAGAGGTCTTCTGCCCTAGCCCGGTCTTCGAAGCTTCCTTTGGCTACTACCCGGTGGAAACAACTGAAGCTTCAACGCCTTTTTTTCCAATCTTCTCTAGCACCGGGCTAGGGAGTAAGCCCGTGGAACCTTAGTTTTGTTCCCTCGGGACTTACTTGTGGTTCCTGTGGTGCACTCCTGACCCTGCTGCTTTGAAAGAA	354
	21	>18-56	AAAGAAATGAGGCGAAGAAGTCCTTCAGGGATCCCCGGGGAAACCTGGAGGAAGTCCGACGAGATCGCGGCTGGGGCTTAGGACCCCACTCCTGCGAGACGGGAGTAATCCTAAACAGGGTTTTCACCCTTCCTTTAGTTTCCTTCCTCTCCTGGAGAGGTCTTCTGCCCTAGCCCGGTCTTCGAAGCTTCCTTTGGCTATTACCCGGTGGAAACAACTGAAGCTTCAACGCCTTTTTTTCCTATCTTCTTTAGCACCGGGCTAGGGAGTAAGCCCGTGGAACCTTAGTTCTGTTCCCTCGGGACTTACTTGTGGTTCCTGTGGTGCACTCCTGACCCTGCTGCTTTGAAAGAA	354
	22	>18-59	AAAGAAATGAGGCGAAGAAGTCCTTCAGGGATCCCCGGGGAAACCTGGAGGAAGTCCGACGAGATCGCGGCTGGGGCTTAGGACCCCACTCCTGCGAGACAGGAGTAATCCTAAACAGGGTTTTCACCCTTCCTTTAGTTTCCTTCCTCTCCTGGAGAGGTCTTCTGCCCTAGCCCGGTCTTCGAAGCTTCCTTTGGCTACTACCCGGTGGAAACAACTGAAGCTTCAACGCCTTTTTTTCCTATCTTCTTTAGCACCGGGCTAGGGAGTAAGCCCGTGGAACCTTAGTTTTGTTCCCTCGGGACTTACTTGTGGTTCCTGTGGTGCACTCCTGACCCTGCTGCTTTGAAAGAA	354
	23	>18-60	AAAGAAATGAGGCGAAGAAGTCCTTCAGGGATCCCCGGGGAAACCTGGAGGAAGTCCGACGAGATCGCGGCTGGGGCTTAGGACCCCACTCCTGCGAGACGGGAGTAATCCTAAACAGGGTTTTCACCCTTCCTTTAGTTTCCTTCCTCTCCTGGAGAGGTCTTCTGCCCTAGCCCGGTCTTCGAAGCTTCCTTTGGCTATTACCCGGTGGAAACAACTGAAGCTTCAACGCCTTTTTTTCCTATCTTCTTTAGCACCGGGCTAGGGAGTAAGCCCGTGGAACCTTAGTTTTGTTCCCTCGGGACCTACTTGTGGTTCCTGTGGTGCACTCCTGACCCTGCTGCTTTGAAAGAA	354

## Sheet: Table S2
Table S2. Classification of sequenced clones based on 105 CSVd variants.
Number of clones, corresponding genome sequence, and names of clones for each variant were described.
v1	AAAGAAATGAGGCGAAGAAGTCCTTCAGGGATCCCCGGGGAAACCTGGAGGAAGTCCGACGAGATCGCGGCTGGGGCTTAGGACCCCACTCCTGCGAGACAGGAGTAATCCTAAACAGGGTTTTCACCCTTCCTTTAGTTTCCTTCCTCTCCTGGAGAGGTCTTCTGCCCTAGCCCGGTCTTCGAAGCTTCCTTTGGCTACTACCCGGTGGAAACAACTGAAGCTTCAACGCCTTTTTTTCCAATCTTCTTTAGCACCGGGCTAGGGAGTAAGCCCGTGGAACCTTAGTTTTGTTCCCTCGGGACTTACTTGTGGTTCCTGTGGTGCACTCCTGACCCTGCTGCTTTGAAAGAA	66	>5-8	>5-11	>1-2	>1-14	>1-17	>1-18	>1-19	>1-25	>1-27	>1-28	>1-29	>2-1	>2-3	>2-9	>2-15	>2-17	>2-18	>2-19	>2-22	>2-27	>2-30	>3-9	>3-25	>4-2	>4-3	>4-7	>4-11	>4-12	>4-14	>4-15	>4-16	>4-17	>4-19	>4-20	>4-21	>4-23	>4-24	>4-25	>4-27	>4-28	>6-12	>6-14	>6-33	>6-36	>6-40	>8-1	>8-2
v2	AAAGAAATGAGGCGAAGAAGTCCTTCAGGGATCCCCGGGGAAACCTGGAGGAAGTCCGACGAGATCGCGGCTGGGGCTTAGGACCCCACTCCTGCGAGACAGGAGTAATCCTAAACAGGGTTTTCACCCTTCCTTTAGTTTCCTTCCTCTCCTGGAGAGGTCTTCTGCCCTAGCCCGGTCTTCGAAGCTTCCTTTGGCTACTACCCGGTGGAAACAACTGAAGCTTCAACGCCTTTTTTTCCTATCTTCTTTAGCACCGGGCTAGGGAGTAAGCCCGTGGAACCTTAGTTTTGTTCCCTCGGGACTTACTTGTGGTTCCTGTGGTGCACTCCTGACCCTGCTGCTTTGAAAGAA	34	>5-3	>5-9	>5-15	>5-18	>5-24	>1-10	>2-4	>2-7	>2-25	>2-31	>3-15	>3-16	>3-19	>3-27	>6-9	>7-1	>7-2	>7-3	>7-7	>7-8	>7-9	>7-10	>7-11	>7-19	>7-21	>16-3	>16-10	>16-40	>16-90	>16-109	>18-10	>18-24	>18-33	>18-59
v3	AAAGAAATGAGGCGAAGAAGTCCTTCAGGGATCCCCGGGGAAACCTGGAGGAAGTCCGACGAGATCGCGGCTGGGGCTTAGGACCCCACTCCTGCGAGACGGGAGTAATCCTAAACAGGGTTTTCACCCTTCCTTTAGTTTCCTTCCTCTCCTGGAGAGGTCTTCTGCCCTAGCCCGGTCTTCGAAGCTTCCTTTGGCTATTACCCGGTGGAAACAACTGAAGCTTCAACGCCTTTTTTTCCTATCTTCTTTAGCACCGGGCTAGGGAGTAAGCCCGTGGAACCTTAGTTTTGTTCCCTCGGGACTTACTTGTGGTTCCTGTGGTGCACTCCTGACCCTGCTGCTTTGAAAGAA	25	>5-14	>3-5	>6-2	>9-14	>9-15	>9-19	>9-23	>9-30	>9-31	>9-50	>9-55	>9-60	>9-64	>11-1	>11-8	>11-11	>11-13	>11-19	>11-22	>11-23	>11-24	>16-16	>18-28	>18-37	>18-39
v4	AAAGAAATGAGGCGAAGAAGTCCTTCAGGGATCCCCGGGGAAACCTGGAGGAAGTCCGACGAGATCGCGGCTGGGGCTTAGGACCCCACTCCTGCGAGACAGGAGTAATCCTAAACAGGGTTTTCACCCTTCCTTTAGTTTCCTTCCTCTCCTGGAGAGGTCTTCTGCCCTAGCCCGGTCTTCGAAGCTTCCTTTGGCTACTACCCGGTGGAAACAACTGAAGCTTCAACGCCTTTTTTTCCAATCTTCTCTAGCACCGGGCTAGGGAGTAAGCCCGTGGAACCTTAGTTTTGTTCCCTCGGGACTTACTTGTGGTTCCTGTGGTGCACTCCTGACCCTGCTGCTTTGAAAGAA	13	>3-2	>6-37	>7-12	>9-63	>16-4	>16-25	>16-38	>16-77	>16-89	>16-97	>18-42	>18-48	>18-55
v5	AAAGAAATGAGGCGAAGAAGTCCTTCAGGGATCCCCGGGGAAACCTGGAGGAAGTCCGACGAGATCGCGGCTGGGGCTTAGGACCCCACTCCTGCGAGACAGGAGTAATCCTAAACAGGGCTTTCACCCTTCCTTTAGTTTCCTTCCTCTCCTGGAGAGGTCTTCTGCCCTAGCCCGGTCTTCGAAGCTTCCTTTGGCTACTACCCGGTGGAAACAACTGAAGCTTCAACGCCTTTTTTTCCAATCTTCTTTAGCACCGGGCTAGGGAGTAAGCCCGTGGAACCTTAGTTTTGTTCCCTCGGGACTTACTTGTGGTTCCTGTGGTGCACTCCTGACCCTGCTGCTTTGAAAGAA	7	>5-10	>5-16	>5-20	>5-22	>1-4	>6-44	>18-36
v6	AAAGAAATGAGGCGAAGAAGTCCTTCAGGGATCCCCGGGGAAACCTGGAGGAAGTCCGACGAGATCGCGGCTGGGGCTTAGGACCCCACTCCTGCGAGACAGGGGTAATCCTAAACAGGGTTTTCACCCTTCCTTTAGTTTCCTTCCTCTCCTGGAGAGGTCTTCTGCCCTAGCCCGGTCTTCGAAGCTTCCTTTGGCTACTACCCGGTGGAAACAACTGAAGCTTCAACGCCTTTTTTTCCAATCTTCTTTAGCACCGGGCTAGGGAGTAAGCCCGTGGAACCTTAGTTTTGTTCCCTCGGGACTTACTTGTGGTTCCTGTGGTGCACTCCTGACCCTGCTGCTTTGAAAGAA	6	>5-2	>1-13	>1-34	>3-1	>3-18	>18-51
v7	AAAGAAATGAGGCGAAGAAGTCCTTCAGGGATCCCCGGGGAAACCCGGAGGAAGTCCGACGAGATCGCGGCTGGGGCTTAGGACCCCACTCCTGCGAGACAGGAGTAATCCTAAACAGGGTTTTCACCCTTCCTTTAGTTTCCTTCCTCTCCTGGAGAGGTCTTCTGCCCTAGCCCGGTCTTCGAAGCTTCCTTTGGCTACTACCCGGTGGAAACAACTGAAGCTTCAACGCCTTTTTTTCCTATCTTCTTTAGCACCGGGCTAGGGAGTAAGCCCGTGGAACCTTAGTTTTGTTCCCTCGGGACTTACTTGTGGTTCCTGTGGTGCACTCCTGACCCTGCTGCTTTGAAAGAA	5	>3-3	>3-8	>3-17	>3-22	>3-28
v8	AAAGAAATGAGGCGAAGAAGTCCTTCAGGGATCCCCGGGGAAACCTGGAGGAAGTCCGACGAGATCGCGGCTGGGGCTTAGGACCCCACTCCTGCGAGACGGGAGTAATCCTAAACAGGGTTTTCACCCTTCCTTTAGTTTCCTTCCTCTCCTGGAGAGGTCTTCTGCCCTAGCCCGGTCTTCGAAGCTTCCTTTGGCTATTACCCGGTGGAAACAACTGAAGCTTCAACGCCTTTTTTTCCTATCTTCTTTAGCACCGGGCTAGGGAGTAAGCCCGTGGAACCTTAGTTCTGTTCCCTCGGGACTTACTTGTGGTTCCTGTGGTGCACTCCTGACCCTGCTGCTTTGAAAGAA	4	>11-5	>11-10	>18-6	>18-56
v9	AAAGAAATGAGGCGAAGAAGTCCTTCAGGGATCCCCGGGGAAACCTGGAGGAAGTCCGACGAGATCGCGGCTGGGGCTTAGGACCCCACTCCTGCGAGACAGGAGTAATCCTAAACAGGGTTTTCACCCTTCCTTTAGTTTCCTTCCTCTCCTGGAGAGGTCTTCTGCCCTAGCCCGGTCTTCGAAGCTTCCTTTGGCTATTACCCGGTGGAAACAACTGAAGCTTCAACGCCTTTTTTTCCTATCTTCTTTAGCACCGGGCTAGGGAGTAAGCCCGTGGAACCTTAGTTTTGTTCCCTCGGGACTTACTTGTGGTTCCTGTGGTGCACTCCTGACCCTGCTGCTTTGAAAGAA	3	>5-21	>2-23	>3-29
v10	AAAGAAATGAGGCGAAGAAGTCCTTCAGGGATCCCCGGGGAAACCTGGAGGAAGTCCGACGAGATCGCGGCTGGGGCTTAGGACCCCACTCCTGCGAGACAGGAGTAATCCTAAACAGGGTTTTCGCCCTTCCTTTAGTTTCCTTCCTCTCCTGGAGAGGTCTTCTGCCCTAGCCCGGTCTTCGAAGCTTCCTTTGGCTACTACCCGGTGGAAACAACTGAAGCTTCAACGCCTTTTTTTCCTATCTTCTTTAGCACCGGGCTAGGGAGTAAGCCCGTGGAACCTTAGTTTTGTTCCCTCGGGACTTACTTGTGGTTCCTGTGGTGCACTCCTGACCCTGCTGCTTTGAAAGAA	3	>5-26	>6-10	>16-54
v11	AAAGAAATGAGGCGAAGAAGTCCTTCAGGGATCCCCAGGGAAACCTGGAGGAAGTCCGACGAGATCGCGGCTGGGGCTTAGGACCCCACTCCTGCGAGACAGGAGTAATCCTAAACAGGGTTTTCACCCTTCCTTTAGTTTCCTTCCTCTCCTGGAGAGGTCTTCTGCCCTAGCCCGGTCTTCGAAGCTTCCTTTGGCTACTACCCGGTGGAAACAACTGAAGCTTCAACGCCTTTTTTTCCAATCTTCTTTAGCACCGGGCTAGGGAGTAAGCCCGTGGAACCTTAGTTTTGTTCCCTCGGGACTTACTTGTGGTTCCTGTGGTGCACTCCTGACCCTGCTGCTTTGAAAGAA	3	>1-26	>6-26	>11-7
v12	AAAGAAATGAGGCGAAGAAGTCCTTCAGGGATCCCCGGGGAAACCTGGAGGAAGTCCGACGAGATCGCGGCTGGGGCTTAGGACCCCACTCCTGCGAGACAGGAGTAATCCTAAACAGGGTTTTCACCCTTCCTTTAGTTTCCTTCCTCTCCTGGAGAGGTCTTCTGCCCTAGCCCGGTCTTCGAAGCTTCCTTTGGCTACTACCCGGTGGAAACAACTGAAGCTTCAACGCCTTTTTTTCCTATCTTCTTTAGCACCGGGCTAGGGAGTAAGCCCGTGGAACCTTAGTTTTGTTCCCTCGGGACTTACTTGTGGTTCCTGTGGTGCACTTCTGACCCTGCTGCTTTGAAAGAA	2	>5-13	>3-12
v13	AAAGAAATGAGGCGAAGAAGTCCTTCAGGGATCCCCGGGGAAACCTGGAGGAAGTCCGACGAGATCGCGGCTGGGGCTTAGGACCCCACTCCTGCGAGACAGGAGTAATCCTAAACAGGGTTTTCACCCTTCCTTTAGTTTCCTTCCTCTCCTGGAGAGGTCTTCTGCCCTAGCCCGGTCTTCGAAGCTTCCTTTGGCTACTACCCGGTGGAAACAACTGAAGCTTCAACGCCTTTTTTTCCTATCTTCTTAAGCACCGGGCTAGGGAGTAAGCCCGTGGAACCTTAGTTTTGTTCCCTCGGGACTTACTTGTGGTTCCTGTGGTGCACTCCTGACCCTGCTGCTTTGAAAGAA	2	>7-5	>7-18
v14	AAAGAAATGAGGCGAAGAAGTCCTTCAGGGATCCCCGGGGAAACCTGGAGGAAGTCCGACGAGATCGCGGCTGGGGCTTAGGACCCCACTCCTGCGAGACAGGAGTAATCCTAAACAGGGTTTTCACCCTTCCTTTAGTTTCCTTCCTCTCCTGGAGAGGTCTTCTGCCCTAGCCCGGTCTTCGAAGCTTCCTTTGGCTACTACCCGGTGGAAACAACTGAAGCTTCAACGCCTTTTTTTCCAATCTTCTTTAGCACCGGGCTAGGGAGTAAGCCCGTGGAACCTTAGTTTTGTTCCCTCGGGACTTACTTGTGGTTCCTGTGGTGTACTCCTGACCCTGCTGCTTTGAAAGAA	2	>11-17	>18-25
v15	AAAGAAATGAGGCGAAGAAGTCCTTCAGGGATCCCCGGGGAAACCTGGAGGAAGTCCGACGAGATCGCGGCTGGGGCTTAGGACCCCACTCCTGCGAGACGGGAGTAATCCTAAACAGGGTTTTCACCCTTCCTTTAGTTTCCTTCCTCTCCTGGAGAGGTCTTCTGCCCTAGCCCGGTCTTCGAAGCTTCCTTTGGCTATTACCCGGTGGAAACAACTGAAGCTTCAACGCCTTTTTTTCCTATCTTCTTTAGCACCGGGCTAGGGAGTAAGCCCGTGGAACCTTAGTTTTGTTCCCTCGGGACCTACTTGTGGTTCCTGTGGTGCACTCCTGACCCTGCTGCTTTGAAAGAA	2	>11-9	>18-60
v16	AAAGAAATGAGGCGAAGAAGTCCTTCAGGGATCCCCGGGGAAACCTGGAGGAAGTCCGACGAGATCGCGGCTGGGGCTTAGGACCCCACTCCTGCGAGACGGGAGTAATCCTAAACAGGGTTTTCACCCTTCCTTTAGTTTCCTTCCTCTCCTGGAGAGGTCTTCTGCCCTAGCCCGGTCTTCGAAGCTTCCTTTGGCTATTACCCGGTGGAAACAACTGAAGCTTCAACGCCTTTTTTTCCTATCTTCCTTAGCACCGGGCTAGGGAGTAAGCCCGTGGAACCTTAGTTTTGTTCCCTCGGGACTTACTTGTGGTTCCTGTGGTGCACTCCTGACCCTGCTGCTTTGAAAGAA	2	>9-5	>9-59
v17	AAAGAAATGAGGCGAAGAAGTCCTTCAGGGATCCCCGGGGAAACCTGGAGGAAGTCCGACGAGATCGCGGCTGGGGCTTAGGACCCCACTCCTGCGAGACAGGGGTAATCCTAAACAGGGCTTTCACCCTTCCTTTAGTTTCCTTCCTCTCCTGGAGAGGTCTTCTGCCCTAGCCCGGTCTTCGAAGCTTCCTTTGGCTACTACCCGGTGGAAACAACTGAAGCTTCAACGCCTTTTTTTCCAATCTTCTTTAGCACCGGGCTAGGGAGTAAGCCCGTGGAACCTTAGTTTTGTTCCCTCGGGACTTACTTGTGGTTCCTGTGGTGCACTCCTGACCCTGCTGCTTTGAAAgAa	2	>6-28	>16-69
v18	AAAGAAATGAGGCGAAGAAGTCCTTCAGGGATCCCCGGGGAAACCTGGAGGAAGTCCGACGAGATCGCGGCTGGGGCTTAGGACCCCACTCCTGCGAGACAGGAGTAATCCTAAACAGGGCTTTCACCCTTCCTTTAGTTTCCTTCCTCTCCTGGAGAGGTCTTCTGCCCTAGCCCGGTCCTCGAAGCTTCCTTTGGCTACTACCCGGTGGAAACAACTGAAGCTTCAACGCCTTTTTTTCCAATCTTCTTTAGCACCGGGCTAGGGAGTAAGCCCGTGGAACCTTAGTTTTGTTCCCTCGGGACTTACTTGTGGTTCCTGTGGTGCACTCCTGACCCTGCTGCTTTGAAAGAA	2	>1-1	>1-16
v19	AAAGAAATGAGGCGAAGAAGTCCTTCAGGGATCCCCGGGGAAACCTGGAGGAAGTCCGACGAGATCGCGGCTGGGGCTTAGGACCCCACTCCCGCGAGACAGGAGTAATCCTAAACAGGGTTTTCACCCTTCCTTTAGTTTCCTTCCTCTCCTGGAGAGGTCTTCTGCCCTAGCCCGGTCTTCGAAGCTTCCTTTGGCTACTACCCGGTGGAAACAACTGAAGCTTCAACGCCTTTTTTTCCTATCTTCTTTAGCACCGGGCTAGGGAGTAAGCCCGTGGAACCTTAGTTTTGTTCCCTCGGGACTTACTTGTGGTTCCTGTGGTGCACTCCTGACCCTGCTGCTTTGAAAGAA	2	>6-24	>6-39
v20	AAAGAAATGAGGCGAAGAAGTCCTTCAGGGATCCCCGGGGAAACCTGGAGGAAGTCCGACGAGATCGCGGCTGGGGCTTAGGACCCCACTCCTGCGAGACAGGAGTAATCCTAAACAGGGTTTTCACCCTTCCTTTAGTTTCCTTCCTCTCCTGGAGAGGTCTTCTGCCCTAGCCCGGTCTTCGAAGCTTCCTTTGGCTACTACCCGGTGGAGACAACTGAAGCTTCAACGCCTTTTTTTCCAATCTTCTCTAGCACCGGGCTAGGGAGTAAGCCCGTGGAACCTTAGTTTTGTTCCCTCGGGACTTACTTGTGGTTCCTGTGGTGCACTCCTGACCCTGCTGCTTTGAAAGAA	1	>1-3
v21	AAAGAAATGAGGCGAAGAAGTCCTTCAGGGATCCCCGGGGAAACCTGGAGGAAGTCCGACGAGATCGCGGCTGGGGCTTAGGACCCCACTCCTGCGAGACAGGAGTAATCCTAAACAGGGTTTTCACCCTTCCTTTAGTTTCCTTCCTCTCCTGGAGAGGTCTTCTGCCCTAGCCCGGTCTTCGAAGCTTCCTTTGGCTACTACCCGGTGGAAACAACTGAAGCTTCAACGCCTTTTTTTCCTATCTTCTTTAGCACCGGGCTAGGGAGTAAGCCCGTGGAACCTTAGTCTTGTTCCCTCGGGACTTACTTGTGGTTCCTGTGGTGCACTCCTGACCCTGCTGCTTTGAAAGAA	1	>2-2
v22	AAAGAAATGAGgCGAAGAAGTCCTTCAGGGATCCCCGGGGAAACCTGGAGGAAGTCCGACGAGATCGCGGCTGGGGCTTAGGACCCCACTCCTGCGAGACAGGAGTAATCCTAAACAGGGTTTTCACCCTTCCTTTAGTTTCCTTCCTCTCCTGGAGAGGTCTTCTGCCCTAGCCCGGTCTTCGAAGCTTCCTTTGGCTACTACCCGGTGGAAACAACTGAAGCTTCAACGCCTTTTTTTCCTATCTTCTTTAGCACCGGGCTAGGGAGTAAGCCCGTGGAACCTTAGTTTTGTTCCCTCGGGACTTACTTGTGGTTCCTGTGGTGCACTCCTGACCCTGCTGCTTTGAAAGAA-	1	>2-6
v23	AAAGAAATGAGGCGAAGAAGTCCTTCAGGGATCCCCGGGGAAACCTGGAGGAAGTCCGACGAGATCGCGGCTGGGGCTTAGGACCCCACTCCTGCGAGACAGGAGTAATCCTAAACAGGGTTTTCACCCTTCCTTTAGTTTCCTTCCTCTCCTGGAGAGGTCTTCTGCCCTAGCCCGGTCTTCGAAGCTTCCTTTGGCTACTACCCGGTGGAAACAACTGAAGCTTCAACGCCTTTTTTTCCAATCTTCTTTAGCACCGGGCTAGGGAGTAAGCCCGTGGAACCTTAGTTTTGTTCCCTCGGGACTTACTTGTGGTTCCTGTGGTGCACTCCTGACCCTGCTGCTTTGAAAGaa--	1	>2-24
v24	AAAGAAATGAGGCGAAGAAGTCCTTCAGGGATCCCCGGGGAAACCTGGAGGAAGTCCGACGAGATCGCGGCTGGGGCTTAGGACCCCACTCCTGCGAGACAGGAGTAATCCTAAACAGGGTTTTCACCCTTCCTTTAGTTTCCTTCCTCTCCTGGAGAGGTCTTCTGCCCTAGCCCGGTCTTCGAAGCTTCCTTTGGCTATTACCCGGTGGAAACAACTGAAGCTTCAGCGCCTTTTTTTCCTATCTTCTTTAGCACCGGGCTAGGGAGTAAGCCCGTGGAACCTTAGTTTTGTTCCCTCGGGACTTACTTGTGGTTCCTGTGGTGCACTCCTGACCCTGCTGCTTTGAAAGAA	1	>3-20
v25	AAaGAAATGAGGCGAAGAAGTCCTTCAGGGATCCCCGGGGAAACCTGGAGGAAGTCCGACGAGATCGCGGCTGGGGCTTAGGACCCCACTCCTGCGAGACAGGAGTAATCCTAAACAGGGTTTTCACCCTTCCTTTAGTTTCCTTCCTCTCCTGGAGAGGTCTTCTGCCCTAGCCCGGTCTTCGAAGCTTCCTTTGGCTACTACCCGGTGGAAACAACTGAAGCTTCAACGCCTTTTTTTCCAATCTTCTTTAGCACCAGGCTAGGGAGTAAGCCCGTGGAACCTTAGTTTTGTTCCCTCGGGACTTACTTGTGGTTCCTGTGGTGCACCCCTGACCCTGCTGCTTTGAAAGAA	1	>3-21
v26	AAAGAAATGAGGCGAAGAAGTCCTTCAGGGATCCCCGGGGAAACCTGGAGGAAGTCCGACGAGATCGCGGCTGGGGCTTAGGACCCCACTCCTGCGAGACAGGAGTAATCCTAAACAGGGTTTTCACCCTTCCTTTAGTTTCCTTCCTCTCCTGGAGAGGTCTTCTGCCCTAGCCCGGTCTTCGAAGCTTCCTTTGGCTACTACCCGGTGGAAACAACTGAAGCTTCAACGCCTTTTTTTCCAATCTTCTTTAGCACCGGGCCAGGGAGTAAGCCCGTGGAACCTTAGTTTTGTTCCCTCGGGACTTACTTGTGGTTCCTGTGGTGCACTCCTGACCCTGCTGCTTTGAAAGAA	1	>4-1
v27	AAAGAAATGAGGCGAAGAAGTCCTTCAGGGATCCCCGGGGAAACCTGGAGGAAGTCCGACGAGATCGCGGCTGGGGCTTAGGACCCCACTCCTGCGAGACAGGAGTAATCCTAAACAGGGTTTTCACCCTTCCTTTAGTTTCCTTCCTCTCCTGGAGAGGTCTTCTGCCCTAGCCCGGTCTTCGAAGCTTCCTTTGGCTACTACCCGGTGGAAACAACTGAAGCTTCAACGCCTTTTTTTCCGATCTTCTTTAGCACCGGGCTAGGGAGTAAGCCCGTGGAACCTTAGTTTTGTTCCCTCGGGACTTACTTGTGGTTCCTGTGGTGCACTCCTGACCCTGCTGCTTTGAAAGAA	1	>4-6
v28	AAAGAAATGAGGCGAAGAAGTCCTTCAGGGATCCCCGGGGAAACCTGGAGGAAGTCCGACGAGATCGCGGCTGGGGCTTAGGACCCCACTCCTGCGAGACAGGAGTAATCCTAAACAGGGTTTTCACCCTTCCTTTAGTTTCCTTCCTCTCCTGGAGAGGTCTTCTGCCCTAGCCCGGTCTTCGAAGCTTCCTTTGGCTACTACCCGGTGGAAACAACCGAAGCTTCAGCGCCTTTTTTTCCAATCTTCTTTAGCACCGGGCTAGGGAGTAAGCCCGTGGAACCTTAGTTTTGTTCCCTCGGGACTTACTTGTGGTTCCTGTGGTGCACTCCTGACCCTGCTGCTTTGAAAGAA	1	>4-8
v29	AAAGAAATGAGGCGAAGAAGTCCTTCAGGGATCCCCGGGGAAACCTGGAGGAAGTCCGACGAGATCGCGGCTGGGGCTTAGGACCCCACTCCTGCGAGACAGGAGTAATCCTAAACAGGGTTTTCACCCTTCCTTTAGTTTCCTTCCTCTCCTGGAGAGGTCTTCTGCCCTAGCCCGGTCTTCGAAGCTTCCTTTGGCTACTACCCGGTGGAAACAACTGAGGCTTCAACGCCTTTTTTTCCAATCTTCTTTAGCACCGGGCTAGGGAGTAAGCCCGTGGAACCTTAGTTTTGTTCCCTCGGGACTTACTTGTGGTTCCTGTGGTGCACTCCTGACCCTGCTGCTTTGAAAGAA	1	>4-10
v30	AAAGAAATGAGGCGAAGAAGTCCTTCAGGGATCCCCGGGGAAACCTGGAGGAAGTCCGACGAGATCGCGGCTGGGGCTTAGGACCCCACTCCTGCGAGACAGGAGTAATCCTAAACAGGGTTTTCACCCTTCCTTTAGTTTCCTTCCTCTCCTGGAGAGGTCTTCTGCCCTAGCCCGGTCTTCGAAGCTTCCTTTGGCTACTACCCGGTGGAAACAACTGGAGCTTCAACGCCTTTTTTTCCAATCTTCTTTAGCACCGGGCTAGGGAGTAAGCCCGTGGAACCTTAGTTTTGTTCCCTCGGGACTTACTTGTGGTTCCTGTGGTGCACTCCTGACCCTGCTGCTTTGAAAGAA	1	>6-16
v31	AAAGAAATGAGGCGAAGAAGTCCTTCAGGGATCCCCGGGGAAACCTGGAGGAAGTCCGACGAGATCGCGGCTGGGGCTTAGGACCCCACTCCTGCGAGACAGGAGTAATCCTAAACAGGGTTTTCACCCTTCCTTTAGTTTCCTTCCTCTCCTGGAGAGGTCTTCTGCCCTAGCCCGGTCTTCGAAGCTTCCTTTGGCTACTACCCGGTGGGAACAACTGAAGCTTCAACGCCTTTTTTTCCAATCTTCTTTAGCACCGGGCTAGGGAGTAAGCCCGTGGAACCTTAGTTTTGTTCCCTCGGGACTTACTTGTGGTTCCTGTGGTGCACTCCTGACCCTGCTGCTTTGAAAGAA	1	>6-25
v32	AAAGAAATGAGGCGAAGAAGTCCTTCAGGGATCCCCGGGGAAACCTGGAGGAAGTCCGACGAGATCGCGGCTGGGGCTTAGGACCCCACTCCTGCGAGACAGGAGTAATCCTAAACAGGGTTTTCACCCTTCCTTTAGTTTCCTTCCTCTCCTGGAGAGGTCTTCTGCCCTAGCCCGGTCTTCGAAGCTTCCTTTGGCTACTACCCGGTGGAAACAACTGAAGCTTCAACGCCTTTTTTTCCTATCTTCTTTAGCACCGGGCTAGGGAGTAAGCCCGTGGAACCTTAGTTTTGTTCCCTCGGGACTTACTTGTGGTTCCTGTGGTGCGCTCCTGACCCTGCTGCTTTGAAAGAa-	1	>7-16
v33	AAAGAAATGAGGCGAAGAAGTCCTTCAGGGATCCCCGGGGAAACCTGGAGGAAGTCCGACGAGATCGCGGCTGGGGCTTAGGACCCCACTCCTGCGAGACAGGAGTAATCCTAAACAGGGTTTTCACCCTTCCTTTAGTTTCCTTCCTCTCCTGGAGAGGTCTTCTGCCCTAGCCCGGTCTTCGAAGCTTCCTTTGGCTACTACCCGGTGGAAACAACTGAAGCTTCAACGCCTTTTTTTCCTATCTTCTTTAGCACCGGGCTAGGGAGTAAGCCCGTGGAACCTTAGTTTTGCTCCCTCGGGACTTACTTGTGGTTCCTGTGGTGCACTCCTGACCCTGCTGCTTTGAAAGAA	1	>7-17
v34	AAAGAAATGAGGCGAAGAAGTCCTTCAGGGATCCCCGGGGAAACCTGGAGGAAGTCCGACGAGATCGCGGCTGGGGCTTAGGACCCCACTCCTGCGAGACAGGAGTAATCCTAAACAGGGTTTTCACCCTTCCTTTAGTTTCCTTCCTCTCCTGGAGAGGTCTTCTGCCCTAGCCCGGTCTTCGAAGCTTCCTTTGGCTACTACCCGGTGGAAACAACTGAAGCTTCAACGCCTTCTTTTCCAATCTTCTTTAGCACCGGGCTAGGGAGTAAGCCCGTGGAACCTTAGTTTTGTTCCCTTGGGACTTACTTGTGGTTCCTGTGGTGCACTCCTGACCCTGCTGCTTTGAAAGAA	1	>8-8
v35	AAAGAAATGAGGCGAAGAAGTCCTTCAGGGATCCCCGGGGAAACCTGGAGGAAGTCCGACGAGATCGCGGCTGGGGCTTAGGACCCCACTCCTGCGAGACAGGAGTAATCCTAAACAGGGTTTTCACCCTTCCTTTAGTTTCCTTCCTCTCCTGGAGAGGTCTTCTGCCCTAGCCCGGTCTTCGAAGCTTCCTTTGGCTACTACCCGGTGGAAACAACTGAAGCTTCAACGCCTTTTTTTCCAATCTTCTTTAGCACCGGGCTAGGGAGTAAGCCCGTGGAACCTTAGTTTTGTTCCCTCGGGACTTACTTGTGGTTCCCGTGGTGCACTCCTGACCCTGCTGCTTTGAAAGAA	1	>8-12
v36	AAAGAAATGAGGCGAAGAAGTCCTTCAGGGATCCCCGGGGAAACCTGGAGGAAGTCCGACGAGATCGCGGCTGGGGCTTAGGACCCCACTCCTGCGAGACAGGAGTAATCCTAAACAGGGTTTTCACCCTTCCTTTAGTTTCCTTCCTCTCCTGGAGAGGTCTTCTGCCCTAGCCCGGTCTTCGAAGCTTCCTTTGGCTACTACCCGGTGGAAACAACTGAAGCTTCAACGCCTTTTTTTCCAATCTTCATTAGCACCGGGCTAGGGAGTAAGCCCGTGGAACCTTAGTTTTGTTCCCTCGGGACTTACTTGTGGTTCCTGTGGTGCACTCCTGACCCTGCTGCTTTGAAAGAA	1	>8-14
v37	AAAGAAATGAGGCGAAGAAGTCCTTCAGGGATCCCCGGGGAAACCTGGAGGAAGTCCGACGAGATCGCGGCTGGGGCTTAGGACCCCACTCCTGCGAGACAGGAGTAATCCTAAACAGGGTTTTCACCCTTCCTTTAGTTTCCTTCCTCTCCTGGAGAGGTCTTCTGCCCTAGCCCGGTCTTCGAAGCTTCCTTTGGCTACTACCCGGTGGAAACAACTGAAGCTTCAACGCCTTTTTTTCCTATCTTCCTTAGCACCGGGCTAGGGAGTAAGCCCGTGGAACCTTAGTTTTGTTCCCTCGGGACTTACTTGTGGTTCCTGTGGTGCACTCCTGACCCTGCTGCTTTGAAAGAA	1	>9-62
v38	AAAGAAATGAGGCGAAGAAGTCCTTCAGGGATCCCCGGGGAAACCTGGAGGAAGTCCGACGAGATCGCGGCTGGGGCTTAGGACCCCACTCCTGCGAGACAGGAGTAATCCTAAACAGGGTTTTCACCCTTCCTTTAGTTTCCTTCCTCTCCTGGAGAGGTCTTCTGCCCTAGCCCGGTCTTCGAAGCTTCCTTTGGCTACTACCCGGTGGAAACAACTGAAGCTTCAACGCCTTTTTTTCCTATCTTCTTTAGCACCGGGCTAGGGAGTAAGCCCGTGGAACCTTAGTTTTGTTCCCTCAGGACTTACTTGTGGTTCCTGTGGTGCACTCCTGACCCTGCTGCTTTGAAAGAA	1	>16-37
v39	AAAGAAATGAGGCGAAGAAGTCCTTCAGGGATCCCCGGGGAAACCTGGAGGAAGTCCGACGAGATCGCGGCTGGGGCTTAGGACCCCACTCCTGCGAGACAGGAGTAATCCTAAACAGGGTTTTCACCCTTCCTTTAGTTTCCTTCCTCTCCTGGAGAGGTCTTCTGCCCTAGCCCGGTCTTCGAAGCTTCCTTTGGCTACTACCCAGTGGAAACAACTGAAGCTTCAACGCCTTTTTTTCCAATCTTCTTTAGCACCGGGCTAGGGAGTAAGCCCGTGGAACCTTAGTTTTGTTCCCTCGGGACTTACTTGTGGTTCCTGTGGTGCACTCCTGACCCTGCTGCTTTGAAAGAA	1	>18-30
v40	AAAGAAATGAGGCGAAGAAGTCCTTCAGGGATCCCCGGGGAAACCTGGAGGAAGTCCGACGAGATCGCGGCTGGGGCTTAGGACCCCACTCCTGCGAGACAGGAGTAATCCTAAACAGGGTTTTCACCCTTCCTTTAGTTTCCTTCCTCTCCTGGAGAGGTCTTCTGCCCTAGCCCGGTCTTCGAAGCTTCCTTTGGCTACTACCCGGCGGAAACAACTGAAGCTTCAACGCCTTTTTTTCCAATCTTCTTTAGCACCGGGCTAGGGAGTAAGCCCGTGGAACCTTAGTTTTGTTCCCTCGGGACTTACTTGTGGTTCCTGTGGTGCACTCCTGACCCTGCTGCTTTGAAAGAA	1	>18-40
v41	AAAGAAATGAGGCGAAGAAGTCCTTCAGGGATCCCCGGGGAAACCTGGAGGAAGTCCGACGAGATCGCGGCTGGGGCTTAGGACCCCACTCCTGCGAGACAGGAGTAATCCTAAACAGGGTTTTCACCCTTCCTTTAGTTTCCTTCCTCTCCTGGAGAGGTCTTCTGCCCTAGCCCGGTCTTCGAAGCTTCCTTTGGCTACTACCCGGTGGAAACAACTGAAGCTTCAACGCCTCTTTTTCCAATCTTCTCTAGCACCGGGCTAGGGAGTAAGCCCGTGGAACCTTAGTTTTGTTCCCTCGGGACTTACTTGTGGTTCCTGTGGTGCACTCCTGACCCTGCTGCTTTGAAAGAA	1	>18-46
v42	AAAGAAATGAGGCGAAGAAGTCCTTCAGGGATCCCCGGGGAAACCTGGAGGAAGTCCGACGAGATCGCGGCTGGGGCTTAGGACCCCACTCCTGCGAGACGGGAGTAATCCTAAACAGGGTTTTCACCCTTCCTTTAGTTTCCTTCCTCTCCTGGAGAGGTCTTCTGCCCTAGCCCGGTCTTCGAAGCTTCCTTTGGCTATTACCCGGTGGAAACAACTGAAGCTTCAACGCCTTTTTTTCCTATCTTCTTTAGCACCGGGCTAGGGGGTAAGCCCGTGGAACCTTAGTTTTGTTCCCTCGGGACTTACTTGTGGTTCCTGTGGTGCACTCCTGACCCTGCTGCTTTGAAAGAA	1	>6-18
v43	AAAGAAATGAGGCGAAGAAGTCCTTCAGGGATCCCCGGGGAAACCTGGAGGAAGTCCGACGAGATCGCGGCTGGGGCTTAGGACCCCACTCCTGCGAGACGGGAGTAATCCTAAACAGGGTTTTCACCCTTCCTTTAGTTTCCTTCCTCTCCTGGAGAGGTCTTCTGCCCTAGCCCGGTCTTCGAAGCTTCCTTTGGCTATTACCCGGTGGAAACAACTGAAGCTTCAACGCCCTTTTTTCCTATCTTCTTTAGCACCGGGCTAGGGAGTAAGCCCGTGGAACCTTAGTTTTGTTCCCTCGGGACTTACTTGTGGTTCCTGTGGTGCACTCCTGACCCTGCTGCTTTGAAAGAA	1	>9-1
v44	AAAGAAATGAGGCGAAGAAGTCCTTCAGGGATCCCCGGGGAAACCTGGAGGAAGTCCGACGAGATCGCGGCTGGGGCTTAGGACCCCACTCCTGCGAGACGGGAGTAATCCTAAACAGGGTTTTCACCCTTCCTTTAGTTTCCTTCCTCTCCTGGAGAGGTCTTCTGCCCTAGCCCGGTCTTCGAAGCTTCCTTTGGCTATTACCCGGTGGAAACAACTGAAGCTTCAACGCCTTTTTTTCCTATCTTCTTTAGCACCGGGCTAGGGGGTAAGCCCGTGGAACCTTAGTCTTGTTCCCTCGGGACTTACTTGTGGTTCCTGTGGTGCACTCCTGACCCTGCTGCTTTGAAAGAA	1	>9-11
v45	AAAGAAATGAGGCGAAGAAGTCCTTCAGGGATCCCCGGGGAAACCTGGAGGAAGTCCGACGAGATCGCGGCTGGGGCTTAGGACCCCACTCCTGCGAGACGGGAGTAATCCTAAACAGGGTTTTCACCCTTCCTTTAGTTTCCTTCCTCTCCTGGAGAGGTCTTCTGCCCTAGCCCGGTCTTCGAAGCTTCCTTTGGCTATTACCCGGTGGAGACAACTGAAGCTTCAACGCCTTTTTTTCCTATCTTCTTTAGCACCGGGCTAGGGAGTAAGCCCGTGGAACCTTAGTTTTGTTCCCTCGGGACTTACTTGTGGTTCCTGTGGTGCACTCCTGACCCTGCTGCTTTGAAAGAA	1	>9-13
v46	AAAGAAATGAGGCGAAGAAGTCCTTCAGGGATCCCCGGGGAAACCTGGAGGAAGTCCGACGAGATCGCGGCTGGGGCTTAGGACCCCACTCCTGCGAGACGGGAGTAATCCTAAACAGGGTTTTCACCCTTCCTTTAGTTTCCTTCCTCTCCTGGAGAGGTCTTCTGCCCTAGCCCGGTCTTCGAAGCTTCCTTTGGCTATTACCCGGTGGAAACAACTGAAGCTTCAACGCCTTTTTTTCCTATCTTCTTTAGCACCGGGCTAGGGAGTAAGCCCGTGGAACCTTAGTTTTGTTCCCTCGGGACTTACTTGTGGTTCCTGCGGTGCACTCCTGACCCTGCTGCTTTGAAAGAA	1	>9-36
v47	AAAGAAATGAGGCGAAGAAGTCCTTCAGGGATCCCCGGGGAAACCTGGAGGAAGTCCGACGAGATCGCGGCTGGGGCTTAGGACCCCACTCCTGCGAGACGGGAGTAATCCTAAACAGGGTTTTCACCCTTCCTTTAGTTTCCTTCCTCTCCTGGAGAGGTCTTCTGCCCTAGCCCGGTCTTCGAAGCTTCCTTTGGCTATTACCCGGTGGAAACAACTGAGGCTTCAACGCCTTTTCTTCCTATCTTCTTTAGCACCGGGCTAGGGAGTAAGCCCGTGGAACCTTAGTTTTGTTCCCTCGGGGCTTACTTGTGGTTCCTGTGGTGCACTCCTGACCCTGCTGCTTTGAAAGAA	1	>9-7
v48	AAAGAAATGAGGCGAAGAAGTCCTTCAGGGATCCCCGGGGAAACCTGGAGGAAGTCCGACGAGATCGCGGCTGGGGCTTAGGACCCCACTCCTGCGAGACGGGAGTAATCCTAAACAGGGTTTTCACCCTTCCTTTAGTTTCCTTCCTCTCCTGGAGAGGTCTTCTGCCCTAGCCCGGTCTTCGAAGCTTCCTTTGGCTATTACCCGGTGGAAACAACTGAAGCTTCAACGCCTTTTTTTCCTATCTTCTTTAGCACCGGGCTAGGGAGTAAGCCCGTGGAACCTTAGTTTTGTTCCCTCGGGGCTTACTTGTGGTTCCTGTGGTGCACTCCTGACCCTGCTGCTTTGAAAGAA	1	>11-3
v49	AAAGAAATGAGGCGAAGAAGTCCTTCAGGGATCCCCGGGGAAACCTGGAGGAAGTCCGACGAGATCGCGGCTGGGGCTTAGGACCCCACTCCTGCGAGACGGGAGTAATCCTAAACAGGGTTTTCACCCTTCCTTTAGTTTCCTTCCTCTCCTGGAGAGGTCTTCTGCCCTAGCCCGGTCTTCGAAGCTTCCTTTGGCTATTACCCGGTGGAAACAACTGAAGCTTCAACGCCTTCTTTTCCTATCTTCTTTAGCACCGGGCTAGGGAGTAAGCCCGTGGAACCTTAGTTTTGTTCCCTCGGGACTTACTTGTGGTTCCTGTGGTGCACTCCTGACCCTGCTGCTTTGAAAGAA	1	>11-4
v50	AAAGAAATGAGGCGAAGAAGTCCTTCAGGGATCCCCGGGGAAACCTGGAGGAAGTCCGACGAGATCGCGGCTGGGGCTTAGGACCCCACTCCTGCGAGACGGGAGTAATCCTAAACAGGGTTTTCACCCTTCCTTTAGTTTCCTTCCTCTCCTGGAGAGGTCTTCTGCCCTAGCCCGGTCTTCGAAGCTTCCTTTGGCTATTACCCGGTGGAAACAACTGAAGCTTCAACGCCTATTTTTCCTATCTTCTTTAGCACCGGGCTAGGGAGTGAGCCCGTGGAACCTTAGTTTTGTTCCCTCGGGACTTACTTGTGGTTCCTGTGGTGCACTCCTGACCCTGCTGCTTTGAAAGAA	1	>11-16
v51	AAAGAAATGAGGCGAAGAAGTCCTTCAGGGATCCCCGGGGAAACCTGGAGGAAGTCCGACGAGATCGCGGCTGGGGCTTAGGACCCCACTCCTGCGAGACAGGAGTAATCCTAAACAGGGCTTTCACCCTTCCTTTAGTTTCCTTCCTCTCCTGGAGAGGTCTTCTGCCCTAGCCCGGTCTTCGAAGCTTCCTTTGGCTACTACCCGGTGGAAACAACTGAAGCTTCAACGCCTTTTTTTCCAATCTTCTTTAGCACCGGGCTAGGGAGTAAGCCCGTGGAACCTTAGTTTTGTTCCCTCGGGACTTACCTGTGGTTCCTGTGGTGCACTCCTGACCCTGCTGCTTTGAAAGAA	1	>1-33
v52	AAAGAAATGAGGCGAAGAAGTCCTTCAGGGATCCCCGGGGAAACCTGGAGGAAGTCCGACGAGATCGCGGCTGGGGCTTAGGACCCCACTCCTGCGAGACAGGAGTAATCCTAAACAGGGCTTTCACCCTTCCTTTAGTTTCCTTCCTCTCCTGGAGAGGTCTTCTGCCCTAGCCCGGTCTTCGAAGCTTCCTTTGGCTACTACCCGGTGGAAACAGCTGAAGCTTCAACGCCTTTTTTTCCAATCTTCTTTAGCACCGGGCTAGGGAGTAAGCCCGTGGAACCTTAGTTTTGTTCCCTCGGGACTTACTTGTGGTTCCTGTGGTGCACTCCTGACCCTGCTGCTTTGAAAGAA	1	>1-36
v53	AAAGAAATGAGGCGAAGAAGTCCTTCAGGGATCCCCGGGGAAACCTGGAGGAAGTCCGACGAGATCGCGGCTGGGGCTTAGGACCCCACTCCTGCGAGACAGGAGTAATCCTAAACAGGGCTTTCACCCTTCCTTTAGTTTCCTTCCTCTCCTGGAGAGGTCTTCTGCCCTAGCCCGGTCTTCGAAGCTTCCTTTGGCTACTACCCGGTGGAAACAACTGAAGCTTCAACGCCCTTTTTTCCAATCTTCTTTAGCACCGGGCTAGGGAGTAAGCCCGTGGAACCTTAGTTTTGTTCCCTCGGGACTTACTTGTGGTTCCTGTGGTGCACTCCTGACCCTGCTGCTTTGAAAGAA	1	>6-22
v54	AAAGAAATGAGGCGAAGAAGTCCTTCAGGGATCCCCGGGGAAACCTGGAGGAAGTCCGACGAGATCGCGGCTGGGGCTTAGGACCCCACTCCTGCGAGACAGGAGTAATCCTAAACAGGGCTTTCACCCTTCCTTTAGTTTCCTTCCTCTCCTGGAGAGGTCTTCTGCCCTAGCCCGGTCTTCGAAGCTTCCTTTGGCTACTACCCGGTGGAAACAACTGAAGCTTCAACGCCTTTTTTTCCAATCTTCTTTAGCACCGGGCTAGGGAGTAAGCCCGTGGAACCTTAGTTTCGTTCCCTCGGGACTTACTTGTGGTTCCTGTGGTGCACTCCTGACCCTGCTGCTTTGAAAGaa	1	>7-13
v55	AAAGAAATGAGGCGAAGAAGTCCTTCAGGGATCCCCGGGGAAACCTGGAGGAAGTCCGACGAGATCGCGGCTGGGGCTTAGGACCCCACTCCTGCGAGACAGGGGTAATCCTAAACAGGGTTTTCACCCTTCCTTTAGTTTCCTTCCTCTCCTGGAGAGGTCTTCTGCCCTAGCCCGGTCTTCGAAGCTTCCTTTGGCTACTACCCGGTGGAAACAACTGAAGCTTCAACGCCTTTTTTTCCAATCTTCTTTAGCACCGGGCTAGGGAGTAAGCCCGTGGAACCTTAGTTTTGTTCCCTCGGGACTTACTTGTGGTTCCTGTGGTGTACTCCTGACCCTGCTGCTTTGAAAGAA	1	>6-38
v56	AAAGAAATGAGGCGAAGAAGTCCTTCAGGGATCCCCGGGGAAACCTGGAGGAAGTCCGACGAGATCGCGGCTGGGGCTTAGGACCCCACTCCTGCGAGACAGGGGTAATCCTAAACAGGGTTTTCACCCTTCCTTTAGTTTCCTTCCTCTCCTGGAGAGGTCTTCTGCCCTAGCCCGGTCTTCGAAGCTTCCTTTGGCTACTACCCGGTGGAAACAACTGAAGCTTCAACGCCTTTTTTTCCAATCTTCTTTAGCACCGGGCTAGGGAGTAAGCCCGTGGAACCTTAGTTTTGTTCCCTCGGGAGTTACTTGTGGTTCCTGTGGTGCACTCCTGACCCTGCTGCTTTGAAAGAA	1	>6-42
v57	AAAGAAATGAGGCGAAGAAGTCCTTCAGGGATCCCCGGGGAAACCTGGAGGAAGTCCGACGAGATCGCGGCTGGGGCTTAGGACCCCACTCCTGCGAGACAGGGGTAATCCTAAACAGGGTTTTCACCCTTCCTTTAGTTTCCTTCCTCTCCTGGAGAGGTCTTCTGCCCTAGCCCGGTCTTCGAAGCTTCCTTTGGCTACTACCCGGTGGAAACAACTGAAGCTTCAACGCCTTTTTTTCCTATCTTCTTTAGCACCGGGCTAGGGAGTAAGCCCGTGGAACCTTAGTTTTGTTCCCTCGGGACTTACTTGTGGTTCCTGTGGTGCACTCCTGACCCTGCTGCTTTGAAAGAA	1	>7-14
v58	AAAGAAATGAGGCGAAGAAGTCCTTCAGGGATCCCCGGGGAAACCCGGAGGAAGTCCGACGAGATCGCGGCTGGGGCTTAGGACCCCACTCCTGCGAGACAGGAGTAATCCTAAACAGGGTTTTCACCCTTCCTTTAGTTTCCTTCCTCTCCTGGAGAGGTCTTCTGCCCTAGCCCGGTCTTCGAAGCTTCCTTTGGCTACTACCCGGTGGAAACAACTGAAGCTTCAACGCCTTTTTTTCCCATCTTCTTTAGCACCGGGCTAGGGAGTAAGCCCGTGGAACCTTAGTTTTGTTCCCTCGGGACTTACTTGTGGTTCCTGTGGTGCACTCCTGACCCTGCTGCTTTGAAAGAA	1	>9-51
v59	AAAGAAATGAGGCGAAGAAGTCCTTCAGGGATCCCCGGGGAAACCTGGAGGAAGTCCGACGAGATCGCGGCTGGGGCTTAGGACCCCACTCCTGCGAGACAGGAGTAATCCTAAACAGGGTTTTCGCCCTTCCTTTAGTTTCCTTCCTCTCCTGGAGAGGTCTTCTGCCCTAGCCCGGTCTTCGAAGCTTCCTTTGGCTACTACCCGGTGGAAACAACTGAAGCTTCAGCGCCTTTTTTTCCTATCTTCTTTAGCACCGGGCTAGGGAGTAAGCCCGTGGAACCTTAGTTTTGTTCCCTCGGGACTTACTTGTGGTTCCTGTGGTGCACTCCTGACCCTGCTGCTTTGAAAGAA	1	>18-13
v60	AAAGAAATGAGGCGAAGAAGTCCTTCAGGGTTCCCCGGGGAAACCTGGAGGAAGTCCGACGAGATCGCGGCTGGGGCTTAGGACCCCACTCCTGCGAGACAGGAGTAATCCTAAACAGGGTTTTCACCCTTCCTTTAGTTTCCTTCCTCTCCTGGAGAGGTCTTCTGCCCTAGCCCGGTCTTCGAAGCTTCCTTTGGCTACTACCCGGTGGAAACAACTGAAGCTTCAACGCCTTTTTTTCCTATCTTCTTTAGCACCGGGCTAGGGAGTAAGCCCGTGGAACCTTAGTTTTGTTCCCTCGGGACTTACTTGTGGTTCCTGTGGTGCACTCCTGACCCTGCTGCTTTGAAAGAA	1	>1-31
v61	AAAGAAATGAGGCGAAGAAGTCCTTCAGGGTTCCCCGGGGAAACCTGGAGGAAGTCCGACGAGATCGCGGCTGGGGCTTAGGACCCCACTCCTGCGAGACAGGAGTAATCCTAAACAGGGTTTTCACCCTTCCTTTAGTTTCCTTCCTCTCCTGGAGAGGTCTTCTGCCCTAGCCCGGTCTTCGAAGCTTCCTTTGGCTACTACCCGGTGGAAACAACTGAAGCTTCAACGCCTTTTTTTCCAATCTTCTTTAGCACCGGGCTAGGGAGTAAGCCCGTGGAACCTTAGTTTTGTTCCCTCGGGACTTACTTGTGGTTCCTGTGGTGCACTCCTGACCCTGCTGCTTTGAAAGAA	1	>3-7
v62	AAAGAAATGAGGCGAAGAAGTCCTTCAGGGATCCCCGGGGAAACCTGGAGGAAGTCCGACGAGATCGCGGCTGGGGCTTAGGACCCCACTCCTGCGAGACAGGAGTAATCCTAAACAGGGTTTTCACCCTTCCTTTAGTTTCCTTCCTCTCCTGGAGGGGTCTTCTGCCCTAGCCCGGTCTTCGAAGCTTCCTTTGGCTACTACCCGGTGGAAACAACTGAAGCTTCAACGCCTTTTTTTCCAATCTTCTTTAGCACCGGGCTAGGGAGTAAGCCCGTGGAACCTTAGTTTTGTTCCCTCGGGACTTACTTGTGGTTCCTGTGGTGCACTCCTGACCCTGCTGCTTTGAAAGAA	1	>8-9
v63	AAAGAAATGAGGCGAAGAAGTCCTTCAGGGATCCCCGGGGAAACCTGGAGGAAGTCCGACGAGATCGCGGCTGGGGCTTAGGACCCCACTCCTGCGAGACAGGAGTAATCCTAAACAGGGTTTTCACCCTTCCTTTAGTTTCCTTCCTCTCCTGGAGGGGTCTTCTGCCCTAGCCCGGTCTTCGAAGCTTCCTTTGGCTACTACCCGGTGGAAACAACTGAAGCTTCAACGCCTTTTTTTCCAATCTTCTCTAGCACCGGGCTAGGGAGTAAGCCCGTGGAACCTTAGTTTTGTTCCCTCGGGACTTACCTGTGGTTCCTGCGGTGCACTCCTGACCCTGCTGCTTTGAAAGAA	1	>18-31
v64	AAAGAAATGAGGCGAAGAAGTCCTTCAGGGATCCCCGGGGAAACCTGGAGGAAGTCCGACGAGATCGCGGCTGGGGCTTAGGACCCCACTCCTGCGAGACAGGAGTAATCCTAAACAGGGTTTTCACCCTTCCTTTAGTTCCCTTCCTCTCCTGGAGAGGTCTTCTGCCCTAGCCCGGTCTTCGAAGCTTCCTTTGGCTACTACCCGGTGGAAACAACTGAAGCTTCAACGCCTTTTTTTCCTATCTTCTTTAGCACCGGGCTAGGGAGTAAGCCCGTGGAACCTTAGTTTTGTTCCCTCGGGACTTACTTGTGGTTCCTGTGGTGCACTCCTGACCCTGCTGCTTTGAAAGAA	1	>5-1
v65	AAAGAAATGAGGCGAAGAAGTCCTTCAGGGATCCCCGGGGAAACCTGGAGGAAGTCCGACGAGATCGCGGCTGGGGCTTAGGACCCCACTCCTGCGAGACAGGAGTAATCCTAAACAGGGTTTTCACCCTTCCTTTAGTTTCCTTCCTCTCCTGGAGAGGTCCTCTGCCCTAGCCCGGTCTTCGAAGCTTCCTTTGACTACTACCCGGTGGAAACAACTGAAGCTTCAACGCCTTTTTTTCCAATCTTCTTTAGCACCGGGCTAGGGAGTAAGCCCGTGGAACCTTAGTTTTGTTCCCTCGGGACTTACTTGTGGTTCCTGTGGTGCACTCCTGACCCTGCTGCTTTGAAAGAA	1	>5-5
v66	AAAGAAATGAGGCGAAGAAGTCCTTCAGGGATCCCCGGGGAAACCTGGAGGAAGTCCGACGAGATCGCGGCTGGGGCTTAGGACCCCACTCCTGCGAGACAGGAGTAATCCTAAACAGGGCTTTCACCCTTCCTTTAGTTTCCTTCCTCTCCTGGAGAGGTCTTCTGCCCTAGCCCAGTCTTCGAAGCTTCCTTTGGCTACTACCCGGTGGAAACAACTGAAGCTTCAACGCCTTTTTTTCCAATCTTCTTTAGCACCGGGCTAGGGAGTAAGCCCGTGGAACCTTAGTTTTGTTCCCTCGGGACTTACTTGTGGTTCCTGTGGTGCACTCCTGACCCTGCTGCTTTGAAAGAA	1	>5-6
v67	AAAGAAATGAGGCGAAGAAGTCCTTCAGGGATCCCCGGGGAAACCTGGAGGAAGTCCGACGAGATCGCGGCTGGGGCTTAGGACCCCACTCCTGCGAGACAGGAGTAATCCTAAACAGGGTTTTCACCCTTCCTTTAGTTTCCTTCCTCTCCTGGAGAGGTCTTCTGCCCTAGCCCGGTCTTCGAAGCCTCCTTTGGCTACTACCCGGTGGAAACAACTGAAGCTTCAACGCCTTTTTTTCCTATCTTCTTTAGCACCGGGCTAGGGAGTAAGCCCGTGGAACCTTAGTTTTGTTCCCTCGGGACTTACTTGTGGTTCCTGTGGTGCACTCCTGACCCTGCTGCTTTGAAAGAA	1	>5-12
v68	AAaGAAATGAGGCGAAGAAGTCCTTCAGGGATCCCCGGGGAAACCTGAAGGAAGTCCGACGAGATCGTGGCTGGGGCTTAGGACCCCACTCCTGCGAGACAGGAGTAATCCTAAACAGGGTTTTCACCCTTCCTTTAATTTCCTTCCTCTCCTGGAGAGGTCTTCTGCCCTAGCCCGGTCTTCGAAGCTTCCTTTGGCTACTACCCGGTGGAAACAACTGAAGCTTCAACGCCTTTTTTTCCAATCTTCTTTAGGACCGGGCCAAGGAGTAAGCCCGTGGAACCTTAGTTTTGTTCCCTCGGGACTTACTTGTGGTTCCTGTGGTGCACTCCTGACCCTGCTGCTTTGAAAGAA	1	>1-9
v69	AAAGAAATGAGGCGAAGAAGTCCTTCAGGGATCCCCGGGGAAACCTGGAGGAAGTCCGACGAGATCGCGGCTGGGGCTTAGGACCCCACTCCTGCGAGACAGGAGTAATCCTAAACAGGGTTTTCACCCTTCCCTTAGTTTCCTTCCTCTCCTGGAGAGGTCTTCTGCCCTAGCCCGGTCTTCGAAGCTTCCTTTGGCTACTACCCGGTGGAAACAACTGAAGCTTCAACGCCTTTTTTTCCAATCTTCTTTAGCACCGGGCTAGGGAGTAAGCCCGTGGAACCTTAGTTTTGTTCCCTCGGGACTTACTTGTGGTTCCTGTGGTGCACTCCTGACCCTGCTGCTTTGAAAGAA	1	>1-24
v70	AAAGAAATGAGGCGAAGAAGTCCTTCAGGGATCCCCGGGGAAACCTGGAGGAAGTCCGACGAGATCGCGGCTGGGGCTTAGGACCTCACTCCTGCGAGACAGGAGTAATCCTAAACAGGGTTTTCACCCTTCCTTTAGTTTCCTTCCTCTCCTGGAGAGGTCTTCTGCCCTAGCCCGGTCTTCGAAGCTTCCTTTGGCTACTACCCGGTGGAAACAACTGAAGCTTCAACGCCTTTTTTTCCTATCTTCTTTAGCACCGGGCTAGGGAGTAAGCCCGTGGAACCTTAGCTTTGTTCCCTCGGGACTTACTTGTGGTTCCTGTGGTGCACTCCTGACCCTGCTGCTTTGAAAGAA	1	>2-11
v71	AAAGAAATGAGGCGAAGAAGTCCTTCAGGGATCCCCGGGGAAACCTGGAGGAAGTCCGACGAGATCGCGGCTGGGGCTTAGGACCCCACTCCTGCGAGACAAGAGTAATCCTAAACAGGGTTTTCACCCTTCCTTTAGTTTCCTTCCTCTCCTGGAGAGGTCTTCTGCCCTAGCCCGGTCTTCGAAGCTTCCTTTGGCTACTACCCGGTGGAAACAACTGAAGCTTCAACGCCTTTTTTTCCAATCTTCTTTAGCACCGGGCTAGGGAGTAAGCCCGTGGAACCTTAGTTTTGTTCCCTCGGGACTTACTTGTGGTTCCTGTGGTGCACTCCTGACCCTGCTGCTTTGAAAGAA	1	>2-12
v72	AAAGAAATGAGGCGAAGAAGTCCTTCAGGGATCCCCGGGGAAACCTGGAGGAAGTCCGACGAGATCGCGGCTGGGGCTTAGGACCCCACTCCTGCGAGACAGGAGTAATCCTAAACAGGGTTCTCACCCTTCCTTTAGTTTCCTTCCTCTCCTGGGGAGGTCTTCTGCCCTAGCCCGGTCTTCGAAGCTTCCTTTGGCTACTACCCGGTGGAAACAACTGAAGCTTCAACGCCTTTTTTTCCAATCTTCTTTAGCACCGGGCTAGGGAGTAAGCCCGTGGAACCTTAGTTTTGTTCCCTCGGGACTTACTTGTGGTTCCTGTGGTGCACTCCTGACCCTGCTGCTTTGAAAGAA	1	>2-20
v73	AAAGAAATGAGGCGAAGAAGTCCTTCAGGGATCCCCGGGGAAACCTGGAGGAAGTCCGACGAGATCGCGGTTGGGGCTTAGGACCCCACTCCTGCGAGACAGGAGTAATCCTAAACAGGGTTTTCACCCTTCCTTTAGTTTCCTTCCTCTCCTGGAGAGGTCTTCTGCCCTAGCCCGGTCTTCGAAGCTTCCTTTGGCTACTACCCGGTGGAAACAACTGAAGCTTCAACGCCTTTTTTTCCAATCTTCTTTAGCACCGGGCTAGGGAGTAAGCCCGTGGAACCTTAGTTTTGTTCCCTCGGGACTTACTTGTGGTTCCTGTGGTGCACTCCTGACCCTGCTGCTTTGAAAGAA	1	>2-26
v74	AAAGAAATGAGGCGAAGAAGTCCTTCAGGGATCCCCGGGGAAACCTGGAGGAAGTCCGACGAGATCGCGGCTGGGGCTTAGGACCCCACTCCTGCGAGACAGGAGTAATCCTAAACAGGGTTTTCACCCTTCCTTTAGTTTCCTTCCTCTCCTGGAGAGGTCTTCTGCCCTAGCCCGGTCTTCGGAGCTTCCTTTGGCTACTACCCGGTGGAAACAACTGAAGCTTCAACGCCTTTTTTTCCTATCTTCTTTAGCACCGGGCTAGGGAGTAAGCCCGTGGAACCTTAGTTTTGTTCCCTCGGGACTTACTTGTGGTTCCTGTGGTGCACTCCTGACCCTGCTGCTTTGAAAGAA	1	>3-4
v75	AAAGAAATGAGGCGAAGAAGTCCTTCAGGGATCCCCGGGGAAACCTGGAGGAAGTCCGACGAGATCGCGGCTGGGGCTTAGGATCCCACTCCTGCGAGACAGGAGTAATCCTAAACAGGGTTTTCACCCTTCCTTTAGTTTCCTTCCTCTCCTGGAGAGGTCTTCTGCCCTAGCCCGGTCTTCGAAGCTTCCTTTGGCTATTACCCGGTGGAAACAACTGAAGCTTCAACGCCTTTTTTTCCTATCTTCTTTAGCACCGGGCTAGGGAGTAAGCCCGTGGAACCTTAGTTTTGTTCCCTCGGGACTTACTTGTGGTTCCTGTGGTGCACTCCTGACCCTGCTGCTTTGAAAGAA	1	>3-6
v76	AAAGAAATGAGGCGAAGAAGTCCTTCAGGGATCCCCGGGGAAACCTGGAGGAAGTCCGACGAGATCGCGGCTGGGGCTTAGGACCCCACTCCTGCGAGACAGGGGTAATCCTAAACAGGGTTTTCACCCCTCCTTTAGTTTCCTTCCTCTCCTGGAGAGGTCTTCTGCCCTAGCCCGGTCTTCGAAGCTTCCTTTGGCTACTACCCGGTGGAAACAACTGAAGCTTCAACGCCTTTTTTTCCAATCTTCTTTAGCACCGGGCTAGGGAGTAAGCCCGTGGAACCTTAGTTTTGTTCCCTCGGGACTTACTTGTGGTTCCTGTGGTGCACTCCTGACCCTGCTGCTTTGAAAGAA	1	>3-26
v77	AAAGAAATGAGGCGAAGAAGTCCTTCGGGGATCCCCGGGGAAACCTGGAGGAAGTCCGACGAGATCGCGGCTGGGGCTTAGGACCCCACTCCTGCGAGACAGGAGTAATCCTAAACAGGGTTTTCACCCTTCCTTTAGTTTCCTTCCTCTCCTGGAGAGGTCTTCTGCCCTAGCCCGGTCTTCGAAGCTTCCTTTGGCTACTACCCGGTGGAAACAACTGAAGCTTCAACGCCTTTTTTTCCAATCTTCTTTAGCACCGGGCTAGGGAGTAAGCCCGTGGAACCTTAGTTTTGTTCCCTCGGGACTTACTTGTGGTTCCTGTGGTGCACTCCTGACCCTGCTGCTTTGAAAGAA	1	>4-4
v78	AAAGAAATGAGGCGAAGAAGTCCTTCAGGGATCCCCGGGGAAACCTGGAGGAAGTCCGACGAGATCGCGGCTGGGGCTTAGGACCCCACTCCTGCGAGACAGGAGTAATCCTAAACAGGGTTTTCACCCTTCCTTTAGTTTCCTTCCTCTCCTGGAGAGGTCTTCTGCCCTAGCCCGGTCTTCGAAGCTTCCTCTGGCTACTACCCGGTGGAAACAACTGAAGCTTCAACGCCTTTTTTTCCAATCTTCTTTAGCACCGGGCTAGGGAGTAAGCCCGTGGAACCTTAGTTTTGTTCCCTCGGGACTTACTTGTGGTTCCTGTGGTGCACTCCTGACCCTGCTGCTTTGAAAGAA	1	>4-18
v79	AAAGAAATGAGGCGAAGAAGTCCTTCAGGGATCCCCGGGGAAACCTGGAGGAAGTCCGACGAGATCGCGGCTGGGGCTTAGGACCCCACTCCTGCGAGACAGGAGTAACCCTAAACAGGGTTTTCACCCTTCCTTTAGTTTCCTTCCTCTCCTGGAGAGGTCTTCTGCCCTAGCCCGGTCTTCGAAGCTTCCTTTGGCTACTACCCGGTGGAAACAACTGAAGCTTCAACGCCTTTTTTTCCAATCTTCTTTAGCACCGGGCTAGGGAGTAAGCCCGTGGAACCTTAGTTTTGTTCCCTCGGGACTTACTTGTGGTTCCTGTGGTGCACTCCTGACCCTGCTGCTTTGAAAGAA	1	>4-26
v80	AAAGAAATGAGGCGAAGAAGTCCTTCAGGGATCCCCGGGGAAACCTGGAGGAAGTCCGACGAGATCGCGGCTGGGGCTTAGGACCCCACTCCTGCGAGACAGGAGTAATCCTAAACAGGGTTTTCACCCTTCCTTTAGTTTCCTTCCCCTCCTGGAGAGGTCTTCTGCCCTAGCCCGGTCTTCGAAGCTTCCTTTGGCTACTACCCGGTGGAAACAACTGAAGCTTCAACGCCTTTTTTTCCAATCTTCTTTAGCACCGGGCTAGGGAGTAAGCCCGTGGAACCTTAGTTTTGTTCCCTCGGGACTTACTTGTGGTTCCTGTGGTGCACTCCTGACCCTGCTGCTTTGAAAGAA	1	>6-4
v81	AAAGAAATGAGGCGAAGAAGTCCTTCAGGGATCCCCGGGGAAACCTGGAGGAAGTCCGACGAGATCGCGGCTGGGGCTTAGGACCCCACTCCTGCGAGACAGGAGTAATCCTAAACAGGGTTTTCACCCTTCTTTTAGTTTCCTTCCTCTCCTGGAGAGGTCTTCTGCCCTAGCCCGGTCTTCGAAGCTTCCTTTGGCTACTACCCGGTGGAAACAACTGAAGCTTCAACGCCTTTTTTTCCTATCTTCTTTAGCACCGGGCTAGGGAGTAAGCCCGTGGAACCTTAGTTTTGTTCCCTCGGGACTTACTTGTGGTTCCTGTGGTGCACTCCTGACCCTGCTGCTTTGAAAGAA	1	>6-15
v82	AAAGAAATGAGGCGAAGAAGTCCTTCAGGGATCCCCGGGGAAACCTGGAGGAAGTCCGACGAGATCGCGGCTGGGGCTTAGGACCCCACTCCTGCGAGACAGGAGTAATCCTAAACAGGGTTTTCACCCTTCCTTTAGTTTCCTTCCTCTCCTGGAGAGGTCTTCTGCCCTAGCCCGGTCTTCGAAGCTCCCTTTGGCTACTACCCGGTGGAAACAACTGAAGCTTCAACGCCTTTTTTTCCTATCTTCTTTAGCACCGGGCTAGGGAGTAAGCCCGTGGAACCTTAGTTTTGTTCCCTCGGGACTTACTTGTGGTTCCTGTGGTGCACTCCTGACCCTGCTGCTTTGAAAGAA	1	>6-19
v83	AAAGAAATGAGGCGAAGAAGTCCTTCAGGGATCCCCGGGGAAACCTGGAGGAAGTCCGACGAGATCGCGGCTGGGGCTTAGGGCCCCACTCCTGCGAGACAGGGGTAATCCTAAACAGGGTTTTCACCCTTCCTTTAGTTTCCTTCCTCTCCTGGAGAGGTCTTCTGCCCTAGCCCGGCCTTCGAAGCTTCCTTTGGCTACTACCCGGTGGAAACAACTGAAGCTTCAACGCCTTTTTTTCCAATCTTCTTTAGCACCGGGCTAGGGAGTAAGCCCGTGGAACCTTAGTTTTGTTCCCTCGGGACTTACTTGTGGTTCCTGTGGTGCACTCCTGACCCTGCTGCTTTGAAAGAA	1	>6-31
v84	AAAGAAATGAGGCGAAGAAGTCCTTCAGGGATCCCCGGGGAAACCTGGAGGAAGTCCGACGAGATCGCGGCTGGGGCTTAGGACCCCACTCCTGCGAGACAGGAGTAATCCTAAACAGGGTTTTCACCCTTCCTTTAGTTTCCTTCCTCTCCTGGAGAGGTCTTCCGCCCTAGCCCGGTCTTCGAAGCTTCCTTTGGCTACTACCCGGTGGAAACAACTGAAGCTTCAACGCCTTTTTTTCCTATCTTCTTTAGCACCGGGCTAGGGAGTAAGCCCGTGGAACCTTAGTTTTGTTCCCTCGGGACTTACTTGTGGTTCCTGTGGTGCACTCCTGACCCTGCTGCTTTGAAAGAA	1	>6-34
v85	AAAGAAATGAGGCGAAGAAGTCCCTCAGGGATCCCCGGGGAAACCTGGAGGAAGTCCGACGAGATCGCGGCTGGGGCTTAGGACCCCACCCCTGCGAGACAGGAGTAATCCTAAACAGGGTTTTCACCCTTCCTTTAGTTTCCTTCCTCTCCTGGAGAGGTCTTCTGCCCTAGCCCGGTCTTCGAAGCTTCCTTTGGCTACTACCCGGTGGAAACAACTGAAGCTTCAACGCCTTTTTTTCCAATCTTCTTTAGCACCGGGCTAGGGAGTAAGCCCGTGGAACCTTAGTTTTGTTCCCTCGGGACTTACTTGTGGTTCCTGTGGTGCACTCCTGACCCTGCTGCTTTGAAAGAA	1	>7-6
v86	AAAgAAATGAGGCGAAGAAGTCCTTCAGGGATCCCCGGGGAAACCTGGAGGAAGTCCGACGAGATCGCGGCTGGGGCTTAGGACCCCACTCCTGCGAGACAGGAGTAATCCTAAACAGGGTTTTCACCCTTCCTTTAGTTTCCTTCCTCTCCTGGAGAGGTCTTCTGCCCTAGCCCGGTCTTCGAAGCTTCCCTTGGCTACTACCCGGTGGAAACAACTGAAGCTTCAACGCCTTTTTTTCCTATCTTCTTTAGCACCGGGCTAGGGAGTAAGCCCGTGGAACCTTAGTTTTGTTCCCTCGGGACTTACTTGTGGTTCCTGTGGTGCACTCCTGACCCTGCTGCTTTGAAAGAA	1	>7-20
v87	AAAGAAATGAGGCGAAGAAGTCCTTCAGGGATCCCCGGGGAAACCTGGAGGAAGTCCGACGAGATCGCGGCTGGGGCTTAGGACCCCACTCCTGCGAGACAGGAGTAATCCTAAACAGGGTTTTCACCCTTCCTTTAGTTTCCTTCCTCTCCTGGAGAGGTCTTCTGCCCTAGCCCGGTCCTCGAAGCTTCCTTTGGCTACTACCCGGTGGAAACAACTGAAGCTTCAACGCCTTTTTTTCCTATCTTCTTTAGCACCGGGCTAGGGAGTAAGCCCGTGGAACCTTAGTTTTGTTCCCTCGGGACTTACTTGTGGTTCCTGTGGTGCACTCCTGACCCTGCTGCTTTGAAAGAA	1	>7-22
v88	AAAGAAATGAGGCGAAGAAGTCCTTCAGGGATCCCCGGGGAAACCTGGAGGAAGTCCGACGAGATCGCGGCTGGGGCTTAGGACCCCACTCCTGCGAGACAGGAGTAATCCTAAACAGGGTTTTCACCCTTCCTTTAGTTTCCTTCCTCTCCTGGAGAGGTCTTCTGCCCTAGCCCGGTCTTCGAAGCTTCCTTCGGCTACTACCCGGTGGAAACAACTGAAGCTTCAACGCCTTTTTTTCCAATCTTCTTTAGCACCGGGCTAGGGAGTAAGCCCGTGGAACCTTAGTTTTGTTCCCTCGGGACATACTTGTGGTTCCTGTGGTGCACTCCTGACCCTGCTGCTTTGAAAGAA	1	>8-11
v89	AAAGAAATGAGGCGAAGAAGTCCTTCAGGGATCCCCGGGGAAACCCGGAGGAAGTCCGACGAGATCGCGGCTGGGGCTTAGGACCCCACTCCTGCGAGACGGGAGTAATCCTAAACAGGGTTTTCACCCTTCCTTTAGTTTCCTTCCTCTCCTGGAGAGGTCTTCTGCCCTAGCCCGGTCTTCGAAGCTTCCTTTGGCTATTACCCGGTGGAAACAACTGAAGCTTCAACGCCTTTTTTTCCTATCTTCTTTAGCACCGGGCTAGGGAGTAAGCCCGTGGAACCTTAGTTTTGTTTCCTCGGGACTTACTTGTGGTTCCTGTGGTGCACTCCTGACCCTGCTGCTTTGAAAGAA	1	>9-41
v90	AAAGAAATGAGGCGAAGAAGTCCTTCAGGGATCCCCGGGGAAACCCGGAGGAAGTCCGACGAGATCGCGGCTGGGGCTTAGGACCCCACTCCTGCGAGACAGGAGTAATCCTAAACAGGGTTTTCACCCTTCCTTTAGTTTCCTTCCTCTCCTGGGGAGGTCTTCTGCCCTAGCCCGGTCTTCGAAGCTTCCTTTGGCTACTACCCGGTGGAAACAACTGAAGCTTCAACGCCTTTTTTTCCTATCTTCTTTAGCACCGGGCTAGGGAGTAAGCCCGTGGAACCTTAGTTTTGTTCCCTCGGGACTTACTTGTGGTTCCTGTGGTGCACTCCTGACCCTGCTGCTTTGAAAGAA	1	>9-47
v91	AAAGAAATGAGGCGAAGAAGTCCTCCAGGGATCCCCGGGGAAACCTGGAGGAAGTCCGACGAGATCGCGGCTGGGGCTTAGGACCCCACTCCTGCGGGACGGGAGTAATCCTAAACAGGGTTTTCACCCTTCCTTTAGTTTCCTTCCTCTCCTGGAGAGGTCTTCTGCCCTAGCCCGGTCTTCGAAGCTTCCTTTGGCTATTACCCGGTGGAAACAACTGAAGCTTCAACGCCTTTTTTTCCTATCTTCTTTAGCACCGGGCTAGGGAGTAAGCCCGTGGAACCTTAGTTTTGTTCCCTCGGGACTTACTTGTGGTTCCTGTGGTGCACTCCTGACCCTGCTGCTTTGAAAGAA	1	>9-58
v92	AAAGAAATGAGGCGAAGAAGTCCTTCAGGGATCCCCGGGGAAACCTGGAGGAAGTCCGACGAGATCGCGGCTGGGGCTTAGGACCCCACTCCTGCGAGACGGGAGTAATCCTAAACAGGGTTTTCACCCTTCCTTTAGTTTCCTTCCTCTCCTGGAGAGGCCTTCTGCCCTAGCCCGGTCTTCGAAGCTTCCTTTGGCTATTACCCGGTGGAAACAACTGAAGCCTCAACGCCTTTTTTTCCTATCTTCTTTAGCACCGGGCTAGGGAGTAAGCCCGTGGAACCTTAGTTTTGTTCCCTCGGGACTTACTTGTGGTTCCTGTGGTGCACTCCTGACCCTGCTGCTTTGAAAGAA	1	>11-6
v93	AAAGAAATGAGGCGAAGAAGTCCTTCAGGGATCCCCAGGGAAACCTGGAGGAAGTCCGACGAGATCGCGGCTGGGGCTTAGGACCCCACTCCTGCGGGACAGGAGTAATCCTAAACAGGGTTTTCACCCTTCCTTTAGTTTCCTTCCTCTCCTGGAGAGGTCTTCTGCCCTAGCCCGGTCTTCGAAGCTTCCTTTGGCTACTACCCGGTGGAAACAACTGAAGCTTCAACGCCTTTTTTTCCAATCTTCTTTAGCACCGGGCTAGGGAGTAAGCCCGTGGAACCTTAGTTTTGTTCCCTCGGGACTTACTTGTGGTTCCTGTGGTGCACTCCTGACCCTGCTGCTTTGAAAGAA	1	>11-15
v94	AAAGAAATGAGGCGAAGAAGTCCTTCAGGGATCCCCGGGGAAACCTGGAGGAAGTCCGACGAGATCGCGGCTGGGGCTTAGGACCCCACTCCTGCGAGACTGGAGTAATCCTAAACAGGGTTTTCACCCTTCCTTTAGTTTCCTTCCTCTCCTGGAGAGGTCTTCTGCCCTAGCCCGGTCTTCGAAGCTTCCTTTGGCTATTACCCCGTGGAAACAACTGAAGCTTCAACGCCTTTTTTTCCTATCTTCTTTAGCACCGGGCTAGGGAGTAAGCCCGTGGAACCTTAGTTTTGTTCCCTCGGGACTTACTCGTGGTTCCTGTGGTGCACTCCTGACCCTGCTGCTTTGAAAGAA	1	>11-18
v95	AAAGAAATGAGGCGAAGAAGTCCTTCAGGGATCCCCGGGGAAACCTGGAGGGAGTCCGACGAGATCGCGGCTGGGGCTTAGGACCCCACTCCTGCGAGACGGGAGTAATCCTAAACAGGGTTTTCACCCTTCCTTTAGTTTCCTTCCTCTCCTGGAGAGGTCTTCTGCCCTAGCCCGGTCTTCGAAGCTTCCTTTGGCTATTACCCGGTGGAAACAACTGAAGCTTCAACGCCTTTTTTTCCTATCTTCTTTAGCACCGGGCTAGGGAGTGAGCCCGTGGAACCTTAGTTTTGTTCCCTCGGGACTTACTTGTGGTTCCTGTGGTGCACTCCTGACCCTGCTGCTTTGAAAGAA	1	>11-20
v96	AAAGAAATGAGGCGAAGAAGTCCTTCAGGGATCCCCGGGGAAACCTGGAGGAAGTCCGACGAGATCGCGGCTGGGGCTTAGGACCCCACTCCTGCGAGACGGGAGTAATCCTAAACAGGGTTTTCGCCCTTCCTTTATTTTCCTTCCTCTCCTGGAGAGGTCTTCTGCCCTAACCCGGTCTTCGAAGCTTCCTTTGGCTATTACCCGGAGGAAACAACTGAAGCTTCAACGCCTTTTTTTCCTATCTTCTTTAGCACCGGGCTAGGGAGTAAGCCCGTGGAACCTTAATTTTGTTCCCTCGGGACTTACTTGTGGTTCCTGTGGTGCACTCCTGACCCTGCTGCTTTGAAAGAA	1	>11-21
v97	AAAGAAATGAGGCGAAGAAGTCCTTCAGGGATCCCCGGGGAAACCTGGAGGAAGTCCGACGAGATCGCGGCTGGGGCTTAGGACCCCACTCCTGCGAGACGGGAGTAATCCTAAACAGGGTTTTCACCCTTCCTTTAGTTTCCTTCCTCTCCCGGAGAGGTCTTCTGCCCTAGCCCGGTCTTCGAAGCTTCCTTTGGCTATTACCCGGTGGAAACAACTGAGGCTTCAACGCCTTTTTTTCCTATCTTCTTTAGCACCGGGCTAGGGAGTAAGCCCGTGGAACCTTAGTTTTGTTCCCTCGGGACTTACTTGTGGTTCCTGTGGTGCACTCCTGACCCTGCTGCTTTGAAAGAA	1	>11-25
v98	AAAGAAATGAGGCGAAGAAGTCCTTCAGGGATCCCCGGGGAAACCTGGAGGAAGTCCGACGAGATCGCGGCTGGGGCTTAGGACCCCACTCCTGCGAGACAGGAGTAATCCTAAACAGGGTTTTCACCCTTCCTTTAGTTTCCTTCCTCTCCTGGAGAGGCCTTCTGCCCTAGCCCGGTCTTCGAAGCTTCCTTTGGCTACTACCCGGTGGAAACAACTGAAGCTTCAACGCCTTTTTTTCCAATCTTCTCTAGCACCGGGCTAGGGAGTAAGCCCGTGGAACCTTAGTTTTGTTCCCTCGGGACTTACTTGTGGTTCCTGTGGTGCACTCCTGACCCTGCTGCTTTGAAAGAA	1	>16-11
v99	AAAGAAATGAGGCGAAGAAGTCCTTCAGGGATCCCCGGGGAAACCTGGAGGAAGTCCGACGAGATCGCGGCTGGGGCTTAGGACCCCACTCCTGCGGGACAGGAGTAATCCTAAACAGGGTTTTCACCCTTCCTTTAGTTTCCTTCCTCTCCTGGAGAGGTCTTCTGCCCTAGCCCGGTCTTCGAAGCTTCCTTTGGCTACTACCCGGTGGAAACAACTGAAGCTTCAACGCCTTTTTTTCCAATCTTCTTTAGCACCGGGCTAGGGAGTAAGCCCGTGGAACCTTAGTTTTGTTCCCTCGGGACTTACTTGTGGTTCCTGTGGTGCACTCCTGACCCTGCTGCTTTGAAAGAA	1	>16-12
v100	AAAGAAATGAGGCGAAGAAGTCCTTCAGGGATCCCCGGGGAAACCTGGAGGAAGTCTGACGAGATCGCGGCTGGGGCTTAGGACCCCACTCCTGCGAGACAGGAGTAATCCTAAACAGGGTTTCCACCCTTCCTTTAGTTTCCTTCCTCTCCTGGAGAGGTCTTCTGCCCTAGCCCGGTCTTCGAAGCTTCCTTTGGCTACTGCCCGGTGGAAACAACTGAAGCTTCAACGCCTTTTTTTCCAATCTTCTCTAGCACCGGGCTAGGGAGTAAGCCCGTGGAACCTTAGTTTTGTTCCCTCGGGACTTACTTGTGGTTCCTGTGGTGCACTCCTGACCCTGCTGCTTTGAAAGAA	1	>16-44
v101	AAAGAAATGAGGCGAAGAAGTCCTTCAGGGATCTCCGGGGAAACCTGGAGGAAGTCCGACGAGATCGCGGCTGGGGCTTAGGACCCCACTCCTGCGAGACAGGAGTAATCCTAAACAGGGTTTTCACCCTTCCTTTAGTTTCCTTCCTCTCCTGGAGAGGTCTTCTGCCCTAGCCCGGTCTTCGAAGCTTCCTTTGGCTACTACCCGGTGGAAACAACTGAAGCTTCAACGCCTTTTTTTCCAATCTTCTCTAGCACCGGGCTAGGGAGTAAGCCCGTGGAACCTTAGTTTTGTTCCCTCGGGACTTACTTGTGGTTCCTGTGGTGCACTCCTGACCCTGCTGCTTTGAAAGAA	1	>16-68
v102	AAAGAAATGAGGCGAAGAAGTCCTTCAGGGATCCCCGGAGAAACCTGGAGGAAGTCCGACGAGATCGCGGCTGGGGCTTAGGACCCCACTCCTGCGAGACGGGAGTAATCCTAAACAGGGTTTTCACCCTTCCTTTAGTTTCCTTCCTCTCCTGGAGAGGTCTTCTGCCCTAGCCCGGTCTTCGAAGCTTCCTTTGGCTATTACCCGGTGGAAACAACTGAAGCTTCAACGCCTTTTTTTCCTATCTTCTTTAGCACCGGGCTAGGGAGTAAGCCCGTGGAACCTTAGTTTTGTTCCCTCGGGACTTACTTGTGGTTCCTGTGGTGCACTCCTGACCCTGCTGCTTTGAAAGAA	1	>16-93
v103	AAAGAAATGAGGCGAAGAAGTCCTTCAGGGATCCCCGGGGAAACCTGGAGGAAGTCCGACGAGATCGCGGCTGGGGCTTAGGACCCCACCCCTGCGAGACAGGAGTAATCCTAAACAGGGTTTTCACCCTTCCTTTAGTTTCCTTCCTCTCCTGGAGAGGTCTTCTGCCCTAGCCCGGTCTTCGAAGCTTCCTTTGGCTACTACCCGGTGGAAACAACTGAAGCTTCAACGCCTTTTTTTCCAATCTTCTCTAGCACCGGGCTAGGGAGTAAGCCCGTGGAACCTTAGTTTTGTTCCCTCGGGACTTACTTGTGGTTCCTGTGGTGCACTCCTGACCCTGCTGCTTTGAAAGAA	1	>16-95
v104	AAAGAAATGAGGCGAAGAAGTCCTTCAGGGATCCCCGGGGAAACCTGGAGGAAGTCCGACGAGATCGCGGCTGGGGCTTAGGACCCCACTCCTGCGAGACAGGAGTAATCCTAAACAGGGTTTTCACCCTTCCTTTAGTTTCCTTCCTTTCCTGGAGAGGTCTTCTGCCCTAGCCCGGTCTTCGAAGCTTCCTTTGGCTACTACCCGGTGGAAACAACTGAAGCTTCAACGCCTTTTTTTCCAATCTTCTCTAGCACCGGGCTAGGGAGTAAGCCCGTGGAACCTTAGTTTTGTTCCCTCGGGACTTACTTGTGGTTCCTGTGGTGCACTCCTGACCCTGCTGCTTTGAAAGAA	1	>16-110
v105	AAAGAAATGAGGCGAAGAAGTCCTTCAGGGATCCCCGGGGAAGCCTGGAGGAAGTCCGACGAGATCGCGGCTGGGGCTTAGGACCCCACTCCTGCGAGACAGGAGTAATCCTAAACAGGGTTTTCACCCTTCCTTTAGTTTCCTTCCTCTCCTGGAGAGGTCTTCTGCCCTAGCCCGGTCTTCGAAGTTTCCTTTGGCTACTACCCGGTGGAAACAACTGAAGCTTCAACGCCTTTTTTTCCTATCTTCTTTAGCACCGGGCTAGGGAGTAAGCCCGTGGAACCTTAGTTTTGTTCCCTCGGGACTTACTTGTGGTTCCTGTGGTGCACTCCTGACCCTGCTGCTTTGAAAGAA	1	>18-29
[truncated: 19 more columns]

## Sheet: Table S3
		1	2	3	4	5	6	7	8	9	11	16	18		Table S3. Distribution of identified CSVd variants in each single plant.
		Ford	YesSong	YellowCap	Shinma_China	Borami	Diskclub	Vatican	Froggy	FirePink	PinkThisPlus	D.pacificum	Shinma_Jeju			FDJ	YSI	YCI	SMC	BRJ	DCI	VCS	FGI	FPJ	PTG	ISI	SMJ
	>1	9	10	2	17	2	5		17	1	1	1	1	66	v1	9	10	2	17	2	5		17	1	1	1	1
	>2	1	4	4		5	1	10				5	4	34	v2	1	4	4		5	1	10				5	4
	>3			1		1	1			10	8	1	3	25	v3			1		1	1			10	8	1	3
	>4			1			1	1		1		6	3	13	v4			1			1	1		1		6	3
	>5	1				4	1						1	7	v5	1				4	1						1
	>6	2		2		1							1	6	v6	2		2		1							1
	>7			5										5	v7			5
	>8										2		2	4	v8										2		2
	>9		1	1		1								3	v9		1	1		1
	>10					1	1					1		3	v10					1	1					1
	>11	1					1				1			3	v11	1					1				1
	>12			1		1								2	v12			1		1
	>13							2						2	v13							2
	>14										1		1	2	v14										1		1
	>15										1		1	2	v15										1		1
	>16									2				2	v16									2
	>17						1					1		2	v17						1					1
	>18	2												2	v18	2
	>19						2							2	v19						2
	>20	1												1	other	6	7	6	7	4	11	7	5	10	9	8	6
	>21		1											1
	>22		1											1
	>23		1											1
	>24			1										1
	>25			1										1
	>26				1									1
	>27				1									1
	>28				1									1
	>29				1									1
	>30						1							1
	>31						1							1
	>32							1						1
	>33							1						1
	>34								1					1
	>35								1					1
	>36								1					1
	>37									1				1
	>38											1		1
	>39												1	1
	>40												1	1
	>41												1	1
	>42						1							1
	>43									1				1
	>44									1				1
	>45									1				1
	>46									1				1
	>47									1				1
	>48										1			1
	>49										1			1
	>50										1			1
	>51	1												1
	>52	1												1
	>53						1							1
	>54							1						1
	>55						1							1
	>56						1							1
	>57							1						1
	>58									1				1
	>59												1	1
	>60	1												1
	>61			1										1
	>62								1					1
	>63												1	1
	>64					1								1
	>65					1								1
	>66					1								1
	>67					1								1
	>68	1												1
	>69	1												1
	>70		1											1
	>71		1											1
	>72		1											1
	>73		1											1
	>74			1										1
	>75			1										1
	>76			1										1
	>77				1									1
	>78				1									1
	>79				1									1
	>80						1							1
	>81						1							1
	>82						1							1
	>83						1							1
	>84						1							1
	>85							1						1
	>86							1						1
	>87							1						1
	>88								1					1
	>89									1				1
	>90									1				1
	>91									1				1
	>92										1			1
	>93										1			1
	>94										1			1
	>95										1			1
	>96										1			1
	>97										1			1
	>98											1		1
	>99											1		1
	>100											1		1
	>101											1		1
	>102											1		1
	>103											1		1
	>104											1		1
	>105												1	1
		22	22	23	24	20	25	20	22	24	23	23	23	271
		12	10	14	8	12	20	10	6	14	15	14	15

## Sheet: Table S4
Table S4. Identification of single nucleotide variation in each variant.
v1	A	A	A	G	A	A	A	T	G	A	G	G	C	G	A	A	G	A	A	G	T	C	C	T	T	C	A	G	G	G	A	T	C	C	C	C	G	G	G	G	A	A	A	C	C	T	G	G	A
v2	A	A	A	G	A	A	A	T	G	A	G	G	C	G	A	A	G	A	A	G	T	C	C	T	T	C	A	G	G	G	A	T	C	C	C	C	G	G	G	G	A	A	A	C	C	T	G	G	A
v3	A	A	A	G	A	A	A	T	G	A	G	G	C	G	A	A	G	A	A	G	T	C	C	T	T	C	A	G	G	G	A	T	C	C	C	C	G	G	G	G	A	A	A	C	C	T	G	G	A
v4	A	A	A	G	A	A	A	T	G	A	G	G	C	G	A	A	G	A	A	G	T	C	C	T	T	C	A	G	G	G	A	T	C	C	C	C	G	G	G	G	A	A	A	C	C	T	G	G	A
v5	A	A	A	G	A	A	A	T	G	A	G	G	C	G	A	A	G	A	A	G	T	C	C	T	T	C	A	G	G	G	A	T	C	C	C	C	G	G	G	G	A	A	A	C	C	T	G	G	A
v6	A	A	A	G	A	A	A	T	G	A	G	G	C	G	A	A	G	A	A	G	T	C	C	T	T	C	A	G	G	G	A	T	C	C	C	C	G	G	G	G	A	A	A	C	C	T	G	G	A
v7	A	A	A	G	A	A	A	T	G	A	G	G	C	G	A	A	G	A	A	G	T	C	C	T	T	C	A	G	G	G	A	T	C	C	C	C	G	G	G	G	A	A	A	C	C	C	G	G	A
v8	A	A	A	G	A	A	A	T	G	A	G	G	C	G	A	A	G	A	A	G	T	C	C	T	T	C	A	G	G	G	A	T	C	C	C	C	G	G	G	G	A	A	A	C	C	T	G	G	A
v9	A	A	A	G	A	A	A	T	G	A	G	G	C	G	A	A	G	A	A	G	T	C	C	T	T	C	A	G	G	G	A	T	C	C	C	C	G	G	G	G	A	A	A	C	C	T	G	G	A
v10	A	A	A	G	A	A	A	T	G	A	G	G	C	G	A	A	G	A	A	G	T	C	C	T	T	C	A	G	G	G	A	T	C	C	C	C	G	G	G	G	A	A	A	C	C	T	G	G	A
v11	A	A	A	G	A	A	A	T	G	A	G	G	C	G	A	A	G	A	A	G	T	C	C	T	T	C	A	G	G	G	A	T	C	C	C	C	A	G	G	G	A	A	A	C	C	T	G	G	A
v12	A	A	A	G	A	A	A	T	G	A	G	G	C	G	A	A	G	A	A	G	T	C	C	T	T	C	A	G	G	G	A	T	C	C	C	C	G	G	G	G	A	A	A	C	C	T	G	G	A
v13	A	A	A	G	A	A	A	T	G	A	G	G	C	G	A	A	G	A	A	G	T	C	C	T	T	C	A	G	G	G	A	T	C	C	C	C	G	G	G	G	A	A	A	C	C	T	G	G	A
v14	A	A	A	G	A	A	A	T	G	A	G	G	C	G	A	A	G	A	A	G	T	C	C	T	T	C	A	G	G	G	A	T	C	C	C	C	G	G	G	G	A	A	A	C	C	T	G	G	A
v15	A	A	A	G	A	A	A	T	G	A	G	G	C	G	A	A	G	A	A	G	T	C	C	T	T	C	A	G	G	G	A	T	C	C	C	C	G	G	G	G	A	A	A	C	C	T	G	G	A
v16	A	A	A	G	A	A	A	T	G	A	G	G	C	G	A	A	G	A	A	G	T	C	C	T	T	C	A	G	G	G	A	T	C	C	C	C	G	G	G	G	A	A	A	C	C	T	G	G	A
v17	A	A	A	G	A	A	A	T	G	A	G	G	C	G	A	A	G	A	A	G	T	C	C	T	T	C	A	G	G	G	A	T	C	C	C	C	G	G	G	G	A	A	A	C	C	T	G	G	A
v18	A	A	A	G	A	A	A	T	G	A	G	G	C	G	A	A	G	A	A	G	T	C	C	T	T	C	A	G	G	G	A	T	C	C	C	C	G	G	G	G	A	A	A	C	C	T	G	G	A
v19	A	A	A	G	A	A	A	T	G	A	G	G	C	G	A	A	G	A	A	G	T	C	C	T	T	C	A	G	G	G	A	T	C	C	C	C	G	G	G	G	A	A	A	C	C	T	G	G	A
v20	A	A	A	G	A	A	A	T	G	A	G	G	C	G	A	A	G	A	A	G	T	C	C	T	T	C	A	G	G	G	A	T	C	C	C	C	G	G	G	G	A	A	A	C	C	T	G	G	A
v21	A	A	A	G	A	A	A	T	G	A	G	G	C	G	A	A	G	A	A	G	T	C	C	T	T	C	A	G	G	G	A	T	C	C	C	C	G	G	G	G	A	A	A	C	C	T	G	G	A
v22	A	A	A	G	A	A	A	T	G	A	G	G	C	G	A	A	G	A	A	G	T	C	C	T	T	C	A	G	G	G	A	T	C	C	C	C	G	G	G	G	A	A	A	C	C	T	G	G	A
v23	A	A	A	G	A	A	A	T	G	A	G	G	C	G	A	A	G	A	A	G	T	C	C	T	T	C	A	G	G	G	A	T	C	C	C	C	G	G	G	G	A	A	A	C	C	T	G	G	A
v24	A	A	A	G	A	A	A	T	G	A	G	G	C	G	A	A	G	A	A	G	T	C	C	T	T	C	A	G	G	G	A	T	C	C	C	C	G	G	G	G	A	A	A	C	C	T	G	G	A
v25	A	A	A	G	A	A	A	T	G	A	G	G	C	G	A	A	G	A	A	G	T	C	C	T	T	C	A	G	G	G	A	T	C	C	C	C	G	G	G	G	A	A	A	C	C	T	G	G	A
v26	A	A	A	G	A	A	A	T	G	A	G	G	C	G	A	A	G	A	A	G	T	C	C	T	T	C	A	G	G	G	A	T	C	C	C	C	G	G	G	G	A	A	A	C	C	T	G	G	A
v27	A	A	A	G	A	A	A	T	G	A	G	G	C	G	A	A	G	A	A	G	T	C	C	T	T	C	A	G	G	G	A	T	C	C	C	C	G	G	G	G	A	A	A	C	C	T	G	G	A
v28	A	A	A	G	A	A	A	T	G	A	G	G	C	G	A	A	G	A	A	G	T	C	C	T	T	C	A	G	G	G	A	T	C	C	C	C	G	G	G	G	A	A	A	C	C	T	G	G	A
v29	A	A	A	G	A	A	A	T	G	A	G	G	C	G	A	A	G	A	A	G	T	C	C	T	T	C	A	G	G	G	A	T	C	C	C	C	G	G	G	G	A	A	A	C	C	T	G	G	A
v30	A	A	A	G	A	A	A	T	G	A	G	G	C	G	A	A	G	A	A	G	T	C	C	T	T	C	A	G	G	G	A	T	C	C	C	C	G	G	G	G	A	A	A	C	C	T	G	G	A
v31	A	A	A	G	A	A	A	T	G	A	G	G	C	G	A	A	G	A	A	G	T	C	C	T	T	C	A	G	G	G	A	T	C	C	C	C	G	G	G	G	A	A	A	C	C	T	G	G	A
v32	A	A	A	G	A	A	A	T	G	A	G	G	C	G	A	A	G	A	A	G	T	C	C	T	T	C	A	G	G	G	A	T	C	C	C	C	G	G	G	G	A	A	A	C	C	T	G	G	A
v33	A	A	A	G	A	A	A	T	G	A	G	G	C	G	A	A	G	A	A	G	T	C	C	T	T	C	A	G	G	G	A	T	C	C	C	C	G	G	G	G	A	A	A	C	C	T	G	G	A
v34	A	A	A	G	A	A	A	T	G	A	G	G	C	G	A	A	G	A	A	G	T	C	C	T	T	C	A	G	G	G	A	T	C	C	C	C	G	G	G	G	A	A	A	C	C	T	G	G	A
v35	A	A	A	G	A	A	A	T	G	A	G	G	C	G	A	A	G	A	A	G	T	C	C	T	T	C	A	G	G	G	A	T	C	C	C	C	G	G	G	G	A	A	A	C	C	T	G	G	A
v36	A	A	A	G	A	A	A	T	G	A	G	G	C	G	A	A	G	A	A	G	T	C	C	T	T	C	A	G	G	G	A	T	C	C	C	C	G	G	G	G	A	A	A	C	C	T	G	G	A
v37	A	A	A	G	A	A	A	T	G	A	G	G	C	G	A	A	G	A	A	G	T	C	C	T	T	C	A	G	G	G	A	T	C	C	C	C	G	G	G	G	A	A	A	C	C	T	G	G	A
v38	A	A	A	G	A	A	A	T	G	A	G	G	C	G	A	A	G	A	A	G	T	C	C	T	T	C	A	G	G	G	A	T	C	C	C	C	G	G	G	G	A	A	A	C	C	T	G	G	A
v39	A	A	A	G	A	A	A	T	G	A	G	G	C	G	A	A	G	A	A	G	T	C	C	T	T	C	A	G	G	G	A	T	C	C	C	C	G	G	G	G	A	A	A	C	C	T	G	G	A
v40	A	A	A	G	A	A	A	T	G	A	G	G	C	G	A	A	G	A	A	G	T	C	C	T	T	C	A	G	G	G	A	T	C	C	C	C	G	G	G	G	A	A	A	C	C	T	G	G	A
v41	A	A	A	G	A	A	A	T	G	A	G	G	C	G	A	A	G	A	A	G	T	C	C	T	T	C	A	G	G	G	A	T	C	C	C	C	G	G	G	G	A	A	A	C	C	T	G	G	A
v42	A	A	A	G	A	A	A	T	G	A	G	G	C	G	A	A	G	A	A	G	T	C	C	T	T	C	A	G	G	G	A	T	C	C	C	C	G	G	G	G	A	A	A	C	C	T	G	G	A
v43	A	A	A	G	A	A	A	T	G	A	G	G	C	G	A	A	G	A	A	G	T	C	C	T	T	C	A	G	G	G	A	T	C	C	C	C	G	G	G	G	A	A	A	C	C	T	G	G	A
v44	A	A	A	G	A	A	A	T	G	A	G	G	C	G	A	A	G	A	A	G	T	C	C	T	T	C	A	G	G	G	A	T	C	C	C	C	G	G	G	G	A	A	A	C	C	T	G	G	A
v45	A	A	A	G	A	A	A	T	G	A	G	G	C	G	A	A	G	A	A	G	T	C	C	T	T	C	A	G	G	G	A	T	C	C	C	C	G	G	G	G	A	A	A	C	C	T	G	G	A
v46	A	A	A	G	A	A	A	T	G	A	G	G	C	G	A	A	G	A	A	G	T	C	C	T	T	C	A	G	G	G	A	T	C	C	C	C	G	G	G	G	A	A	A	C	C	T	G	G	A
v47	A	A	A	G	A	A	A	T	G	A	G	G	C	G	A	A	G	A	A	G	T	C	C	T	T	C	A	G	G	G	A	T	C	C	C	C	G	G	G	G	A	A	A	C	C	T	G	G	A
v48	A	A	A	G	A	A	A	T	G	A	G	G	C	G	A	A	G	A	A	G	T	C	C	T	T	C	A	G	G	G	A	T	C	C	C	C	G	G	G	G	A	A	A	C	C	T	G	G	A
v49	A	A	A	G	A	A	A	T	G	A	G	G	C	G	A	A	G	A	A	G	T	C	C	T	T	C	A	G	G	G	A	T	C	C	C	C	G	G	G	G	A	A	A	C	C	T	G	G	A
v50	A	A	A	G	A	A	A	T	G	A	G	G	C	G	A	A	G	A	A	G	T	C	C	T	T	C	A	G	G	G	A	T	C	C	C	C	G	G	G	G	A	A	A	C	C	T	G	G	A
v51	A	A	A	G	A	A	A	T	G	A	G	G	C	G	A	A	G	A	A	G	T	C	C	T	T	C	A	G	G	G	A	T	C	C	C	C	G	G	G	G	A	A	A	C	C	T	G	G	A
v52	A	A	A	G	A	A	A	T	G	A	G	G	C	G	A	A	G	A	A	G	T	C	C	T	T	C	A	G	G	G	A	T	C	C	C	C	G	G	G	G	A	A	A	C	C	T	G	G	A
v53	A	A	A	G	A	A	A	T	G	A	G	G	C	G	A	A	G	A	A	G	T	C	C	T	T	C	A	G	G	G	A	T	C	C	C	C	G	G	G	G	A	A	A	C	C	T	G	G	A
v54	A	A	A	G	A	A	A	T	G	A	G	G	C	G	A	A	G	A	A	G	T	C	C	T	T	C	A	G	G	G	A	T	C	C	C	C	G	G	G	G	A	A	A	C	C	T	G	G	A
v55	A	A	A	G	A	A	A	T	G	A	G	G	C	G	A	A	G	A	A	G	T	C	C	T	T	C	A	G	G	G	A	T	C	C	C	C	G	G	G	G	A	A	A	C	C	T	G	G	A
v56	A	A	A	G	A	A	A	T	G	A	G	G	C	G	A	A	G	A	A	G	T	C	C	T	T	C	A	G	G	G	A	T	C	C	C	C	G	G	G	G	A	A	A	C	C	T	G	G	A
v57	A	A	A	G	A	A	A	T	G	A	G	G	C	G	A	A	G	A	A	G	T	C	C	T	T	C	A	G	G	G	A	T	C	C	C	C	G	G	G	G	A	A	A	C	C	T	G	G	A
v58	A	A	A	G	A	A	A	T	G	A	G	G	C	G	A	A	G	A	A	G	T	C	C	T	T	C	A	G	G	G	A	T	C	C	C	C	G	G	G	G	A	A	A	C	C	C	G	G	A
v59	A	A	A	G	A	A	A	T	G	A	G	G	C	G	A	A	G	A	A	G	T	C	C	T	T	C	A	G	G	G	A	T	C	C	C	C	G	G	G	G	A	A	A	C	C	T	G	G	A
v60	A	A	A	G	A	A	A	T	G	A	G	G	C	G	A	A	G	A	A	G	T	C	C	T	T	C	A	G	G	G	T	T	C	C	C	C	G	G	G	G	A	A	A	C	C	T	G	G	A
v61	A	A	A	G	A	A	A	T	G	A	G	G	C	G	A	A	G	A	A	G	T	C	C	T	T	C	A	G	G	G	T	T	C	C	C	C	G	G	G	G	A	A	A	C	C	T	G	G	A
v62	A	A	A	G	A	A	A	T	G	A	G	G	C	G	A	A	G	A	A	G	T	C	C	T	T	C	A	G	G	G	A	T	C	C	C	C	G	G	G	G	A	A	A	C	C	T	G	G	A
v63	A	A	A	G	A	A	A	T	G	A	G	G	C	G	A	A	G	A	A	G	T	C	C	T	T	C	A	G	G	G	A	T	C	C	C	C	G	G	G	G	A	A	A	C	C	T	G	G	A
v64	A	A	A	G	A	A	A	T	G	A	G	G	C	G	A	A	G	A	A	G	T	C	C	T	T	C	A	G	G	G	A	T	C	C	C	C	G	G	G	G	A	A	A	C	C	T	G	G	A
v65	A	A	A	G	A	A	A	T	G	A	G	G	C	G	A	A	G	A	A	G	T	C	C	T	T	C	A	G	G	G	A	T	C	C	C	C	G	G	G	G	A	A	A	C	C	T	G	G	A
v66	A	A	A	G	A	A	A	T	G	A	G	G	C	G	A	A	G	A	A	G	T	C	C	T	T	C	A	G	G	G	A	T	C	C	C	C	G	G	G	G	A	A	A	C	C	T	G	G	A
v67	A	A	A	G	A	A	A	T	G	A	G	G	C	G	A	A	G	A	A	G	T	C	C	T	T	C	A	G	G	G	A	T	C	C	C	C	G	G	G	G	A	A	A	C	C	T	G	G	A
v68	A	A	A	G	A	A	A	T	G	A	G	G	C	G	A	A	G	A	A	G	T	C	C	T	T	C	A	G	G	G	A	T	C	C	C	C	G	G	G	G	A	A	A	C	C	T	G	A	A
v69	A	A	A	G	A	A	A	T	G	A	G	G	C	G	A	A	G	A	A	G	T	C	C	T	T	C	A	G	G	G	A	T	C	C	C	C	G	G	G	G	A	A	A	C	C	T	G	G	A
v70	A	A	A	G	A	A	A	T	G	A	G	G	C	G	A	A	G	A	A	G	T	C	C	T	T	C	A	G	G	G	A	T	C	C	C	C	G	G	G	G	A	A	A	C	C	T	G	G	A
v71	A	A	A	G	A	A	A	T	G	A	G	G	C	G	A	A	G	A	A	G	T	C	C	T	T	C	A	G	G	G	A	T	C	C	C	C	G	G	G	G	A	A	A	C	C	T	G	G	A
v72	A	A	A	G	A	A	A	T	G	A	G	G	C	G	A	A	G	A	A	G	T	C	C	T	T	C	A	G	G	G	A	T	C	C	C	C	G	G	G	G	A	A	A	C	C	T	G	G	A
v73	A	A	A	G	A	A	A	T	G	A	G	G	C	G	A	A	G	A	A	G	T	C	C	T	T	C	A	G	G	G	A	T	C	C	C	C	G	G	G	G	A	A	A	C	C	T	G	G	A
v74	A	A	A	G	A	A	A	T	G	A	G	G	C	G	A	A	G	A	A	G	T	C	C	T	T	C	A	G	G	G	A	T	C	C	C	C	G	G	G	G	A	A	A	C	C	T	G	G	A
v75	A	A	A	G	A	A	A	T	G	A	G	G	C	G	A	A	G	A	A	G	T	C	C	T	T	C	A	G	G	G	A	T	C	C	C	C	G	G	G	G	A	A	A	C	C	T	G	G	A
v76	A	A	A	G	A	A	A	T	G	A	G	G	C	G	A	A	G	A	A	G	T	C	C	T	T	C	A	G	G	G	A	T	C	C	C	C	G	G	G	G	A	A	A	C	C	T	G	G	A
v77	A	A	A	G	A	A	A	T	G	A	G	G	C	G	A	A	G	A	A	G	T	C	C	T	T	C	G	G	G	G	A	T	C	C	C	C	G	G	G	G	A	A	A	C	C	T	G	G	A
v78	A	A	A	G	A	A	A	T	G	A	G	G	C	G	A	A	G	A	A	G	T	C	C	T	T	C	A	G	G	G	A	T	C	C	C	C	G	G	G	G	A	A	A	C	C	T	G	G	A
v79	A	A	A	G	A	A	A	T	G	A	G	G	C	G	A	A	G	A	A	G	T	C	C	T	T	C	A	G	G	G	A	T	C	C	C	C	G	G	G	G	A	A	A	C	C	T	G	G	A
v80	A	A	A	G	A	A	A	T	G	A	G	G	C	G	A	A	G	A	A	G	T	C	C	T	T	C	A	G	G	G	A	T	C	C	C	C	G	G	G	G	A	A	A	C	C	T	G	G	A
v81	A	A	A	G	A	A	A	T	G	A	G	G	C	G	A	A	G	A	A	G	T	C	C	T	T	C	A	G	G	G	A	T	C	C	C	C	G	G	G	G	A	A	A	C	C	T	G	G	A
v82	A	A	A	G	A	A	A	T	G	A	G	G	C	G	A	A	G	A	A	G	T	C	C	T	T	C	A	G	G	G	A	T	C	C	C	C	G	G	G	G	A	A	A	C	C	T	G	G	A
v83	A	A	A	G	A	A	A	T	G	A	G	G	C	G	A	A	G	A	A	G	T	C	C	T	T	C	A	G	G	G	A	T	C	C	C	C	G	G	G	G	A	A	A	C	C	T	G	G	A
v84	A	A	A	G	A	A	A	T	G	A	G	G	C	G	A	A	G	A	A	G	T	C	C	T	T	C	A	G	G	G	A	T	C	C	C	C	G	G	G	G	A	A	A	C	C	T	G	G	A
v85	A	A	A	G	A	A	A	T	G	A	G	G	C	G	A	A	G	A	A	G	T	C	C	C	T	C	A	G	G	G	A	T	C	C	C	C	G	G	G	G	A	A	A	C	C	T	G	G	A
v86	A	A	A	G	A	A	A	T	G	A	G	G	C	G	A	A	G	A	A	G	T	C	C	T	T	C	A	G	G	G	A	T	C	C	C	C	G	G	G	G	A	A	A	C	C	T	G	G	A
v87	A	A	A	G	A	A	A	T	G	A	G	G	C	G	A	A	G	A	A	G	T	C	C	T	T	C	A	G	G	G	A	T	C	C	C	C	G	G	G	G	A	A	A	C	C	T	G	G	A
v88	A	A	A	G	A	A	A	T	G	A	G	G	C	G	A	A	G	A	A	G	T	C	C	T	T	C	A	G	G	G	A	T	C	C	C	C	G	G	G	G	A	A	A	C	C	T	G	G	A
v89	A	A	A	G	A	A	A	T	G	A	G	G	C	G	A	A	G	A	A	G	T	C	C	T	T	C	A	G	G	G	A	T	C	C	C	C	G	G	G	G	A	A	A	C	C	C	G	G	A
v90	A	A	A	G	A	A	A	T	G	A	G	G	C	G	A	A	G	A	A	G	T	C	C	T	T	C	A	G	G	G	A	T	C	C	C	C	G	G	G	G	A	A	A	C	C	C	G	G	A
v91	A	A	A	G	A	A	A	T	G	A	G	G	C	G	A	A	G	A	A	G	T	C	C	T	C	C	A	G	G	G	A	T	C	C	C	C	G	G	G	G	A	A	A	C	C	T	G	G	A
v92	A	A	A	G	A	A	A	T	G	A	G	G	C	G	A	A	G	A	A	G	T	C	C	T	T	C	A	G	G	G	A	T	C	C	C	C	G	G	G	G	A	A	A	C	C	T	G	G	A
v93	A	A	A	G	A	A	A	T	G	A	G	G	C	G	A	A	G	A	A	G	T	C	C	T	T	C	A	G	G	G	A	T	C	C	C	C	A	G	G	G	A	A	A	C	C	T	G	G	A
v94	A	A	A	G	A	A	A	T	G	A	G	G	C	G	A	A	G	A	A	G	T	C	C	T	T	C	A	G	G	G	A	T	C	C	C	C	G	G	G	G	A	A	A	C	C	T	G	G	A
v95	A	A	A	G	A	A	A	T	G	A	G	G	C	G	A	A	G	A	A	G	T	C	C	T	T	C	A	G	G	G	A	T	C	C	C	C	G	G	G	G	A	A	A	C	C	T	G	G	A
v96	A	A	A	G	A	A	A	T	G	A	G	G	C	G	A	A	G	A	A	G	T	C	C	T	T	C	A	G	G	G	A	T	C	C	C	C	G	G	G	G	A	A	A	C	C	T	G	G	A
v97	A	A	A	G	A	A	A	T	G	A	G	G	C	G	A	A	G	A	A	G	T	C	C	T	T	C	A	G	G	G	A	T	C	C	C	C	G	G	G	G	A	A	A	C	C	T	G	G	A
v98	A	A	A	G	A	A	A	T	G	A	G	G	C	G	A	A	G	A	A	G	T	C	C	T	T	C	A	G	G	G	A	T	C	C	C	C	G	G	G	G	A	A	A	C	C	T	G	G	A
v99	A	A	A	G	A	A	A	T	G	A	G	G	C	G	A	A	G	A	A	G	T	C	C	T	T	C	A	G	G	G	A	T	C	C	C	C	G	G	G	G	A	A	A	C	C	T	G	G	A
v100	A	A	A	G	A	A	A	T	G	A	G	G	C	G	A	A	G	A	A	G	T	C	C	T	T	C	A	G	G	G	A	T	C	C	C	C	G	G	G	G	A	A	A	C	C	T	G	G	A
v101	A	A	A	G	A	A	A	T	G	A	G	G	C	G	A	A	G	A	A	G	T	C	C	T	T	C	A	G	G	G	A	T	C	T	C	C	G	G	G	G	A	A	A	C	C	T	G	G	A
v102	A	A	A	G	A	A	A	T	G	A	G	G	C	G	A	A	G	A	A	G	T	C	C	T	T	C	A	G	G	G	A	T	C	C	C	C	G	G	A	G	A	A	A	C	C	T	G	G	A
v103	A	A	A	G	A	A	A	T	G	A	G	G	C	G	A	A	G	A	A	G	T	C	C	T	T	C	A	G	G	G	A	T	C	C	C	C	G	G	G	G	A	A	A	C	C	T	G	G	A
v104	A	A	A	G	A	A	A	T	G	A	G	G	C	G	A	A	G	A	A	G	T	C	C	T	T	C	A	G	G	G	A	T	C	C	C	C	G	G	G	G	A	A	A	C	C	T	G	G	A
v105	A	A	A	G	A	A	A	T	G	A	G	G	C	G	A	A	G	A	A	G	T	C	C	T	T	C	A	G	G	G	A	T	C	C	C	C	G	G	G	G	A	A	G	C	C	T	G	G	A
Position	56	57	58	59	60	61	62	63	64	65	66	67	68	69	70	71	72	73	74	75	76	77	78	79	80	81	82	83	84	85	86	87	88	89	90	91	92	93	94	95	96	97	98	99	100	101	102	103	104
Nucleotide	A	A	A	G	A	A	A	U	G	A	G	G	C	G	A	A	G	A	A	G	U	C	C	U	U	C	A	G	G	G	A	U	C	C	C	C	G	G	G	G	A	A	A	C	C	U	G	G	A
Substitution rate (%)	100	100	100	100	100	100	100	100	100	100	100	100	100	100	100	100	100	100	100	100	100	100	100	99.0476	99.0476	100	99.0476	100	100	100	98.0952	100	100	99.0476	100	100	98.0952	100	99.0476	100	100	100	99.0476	100	100	96.1905	100	99.0476	100
[truncated: 306 more columns]
